# Supplementary material for: A unified strategy for remote C–H fluorination of phenylacetic acids and their homologues at the meta-position
Source: Royal Society of Chemistry journal article supplement (doi:10.1039/d6sc01331g), 2026-04-24
Supplement: d6sc01331g1.pdf [file d6sc01331g1.pdf]

## Supporting Information

### **A Unified Strategy for Remote C-H Fluorination of Phenylacetic Acids and Their Homologues at *meta*-Position**

Kun Zhou,<sup>a</sup> Xin Chen,<sup>a</sup> Yue Wang,<sup>a</sup> Yang-Jie Mao,<sup>\*a</sup> Xin Yang,<sup>a</sup> Kai Liu,<sup>a</sup> Qi Pan,<sup>a</sup> Dong-Liang Pan,<sup>a</sup> Dan-Qian Xu<sup>\*a</sup> and Shao-Jie Lou<sup>\*a</sup>

Catalytic Hydrogenation Research Center, State Key Laboratory Breeding Base of Green Chemistry-Synthesis Technology, Key Laboratory of Green Pesticides and Cleaner Production Technology of Zhejiang Province, Zhejiang University of Technology, Hangzhou 310014, P. R. China

E-mail: [chrc@zjut.edu.cn](mailto:chrc@zjut.edu.cn) (D.-Q. Xu); [loushaojie@zjut.edu.cn](mailto:loushaojie@zjut.edu.cn) (S.-J. Lou); [maoyangjie@zjut.edu.cn](mailto:maoyangjie@zjut.edu.cn) (Y.-J. Mao).

## Table of Contents

|                                                            |      |
|------------------------------------------------------------|------|
| 1. General.....                                            | S3   |
| 2. Preparation of starting materials .....                 | S3   |
| 3. Condition screening .....                               | S5   |
| 4. Typical experimental procedure .....                    | S7   |
| 5. Deuterium-labelling experiments.....                    | S8   |
| 6. X-Ray analysis for <b>2h</b> .....                      | S9   |
| 7. Determination of the structure of target compounds..... | S14  |
| 8. Further transformation .....                            | S18  |
| 9. Characterisation of new compounds .....                 | S22  |
| 10. Failed or less successful substrates.....              | S37  |
| 11. Copy of NMR spectra .....                              | S38  |
| 12. References.....                                        | S106 |

# 1. General

**Chemicals:** Unless otherwise stated, all experiments were carried out under air atmosphere. The reagents and solvents were purchased from commercial suppliers and used without further purification unless otherwise noted.

**NMR spectroscopy:** <sup>1</sup>H NMR spectra were acquired on Bruker AVANCE spectrometers (400, 500, or 600 MHz) in CDCl<sub>3</sub> with tetramethylsilane (TMS) as the internal reference. <sup>13</sup>C NMR spectra were acquired on Bruker AVANCE spectrometers (101, 126 or 151 MHz) in CDCl<sub>3</sub> with tetramethylsilane (TMS) as the internal reference. <sup>19</sup>F NMR spectra were acquired on Bruker AVANCE spectrometers (376, 470 or 565 MHz) in CDCl<sub>3</sub> with tetramethylsilane (TMS) as the internal reference. Chemical shifts ( $\delta$ ) are reported in ppm relative to residual solvent signals: CHCl<sub>3</sub> ( $\delta$  7.26 ppm for <sup>1</sup>H) and CDCl<sub>3</sub> ( $\delta$  77.16 ppm for <sup>13</sup>C). Coupling constants (*J*) are expressed in Hz. Multiplicity descriptors: s (singlet), d (doublet), t (triplet), q (quartet), p (pentet), dd (doublet of doublets), td (triplet of doublets), ddd (doublet of doublet of doublets), m (multiplet), br (broad resonance).

## Analytical Techniques:

- **GC:** Agilent 7890B system equipped with an FID detector.
- **GC-MS:** Agilent 6890N GC coupled to a 5973N mass spectrometer, using dodecane as an internal standard.
- **HRMS:** Agilent 6545 Q-TOF LC-MS, Waters GCT Premier TOF mass spectrometer with electron impact (EI) or chemical ionization (CI).
- **XRD:** The Bruker D8 venture uses a room-temperature molybdenum target.

**General Procedures:** Reagents were weighed under ambient laboratory conditions. Unless specified, reactions were performed in air without inert gas protection.

**The separation method for fluorinated products:** Initially, crude separation is carried out by column chromatography, followed by separation using preparative Thin-layer chromatography (TLC).

**Abbreviations:** Petroleum ether (PE), Ethyl acetate (EA), 1,2-Dichloroethane (DCE), Dichloromethane (DCM), Tetrahydrofuran (THF), Triethylamine (Et<sub>3</sub>N), Diethyl ether (Et<sub>2</sub>O), Trifluoroacetic acid (TFA), N,N-Dicyclohexylcarbodiimide (DCC), 4-Dimethylaminopyridine (DMAP), N-Fluorobenzenesulfonimide (NFSI), Hexafluoroisopropanol (HFIP), Directing Group (DG), Thin-layer chromatography (TLC).

# 2. Preparation of starting materials

## 2.1 Preparation of directing-groups

### *General method A<sup>1</sup>*

To a 25 mL Schlenk tube equipped with a magnetic stirring bar, 3-bromopyridine (2.0 mmol), 2-hydroxyphenylboronic acid (3.0 mmol), Pd(PPh<sub>3</sub>)<sub>4</sub> (2.0 mol%), Sphos (4.0 mol%), K<sub>3</sub>PO<sub>4</sub> (4 mmol) were added under N<sub>2</sub>, THF (4 mL) was added by use of syringe. After stirring at room temperature for half an hour, then move the reaction to reflux for 16 h. Upon completion, the mixture was quenched with water (10 mL), and extracted with EtOAc (3 × 10 mL). Then the combined organic layers were washed with brine and dried over anhydrous MgSO<sub>4</sub>, filtrated and concentrated in *vacuo*

to give the crude product, the crude mixture was purified by silica gel chromatography (PE: EA=1:1, v/v) to afford the directing group (**1a-x**).

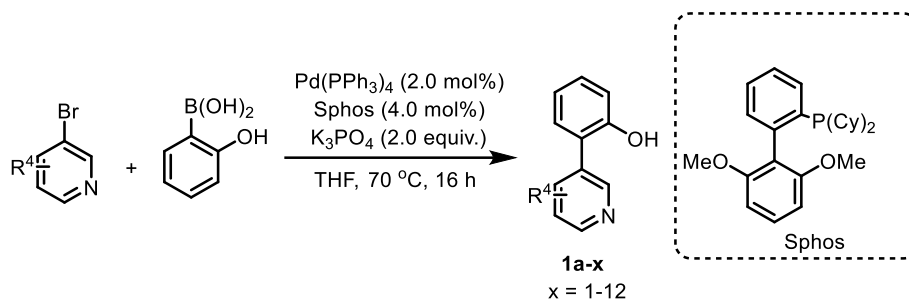

### General method B<sup>2</sup>

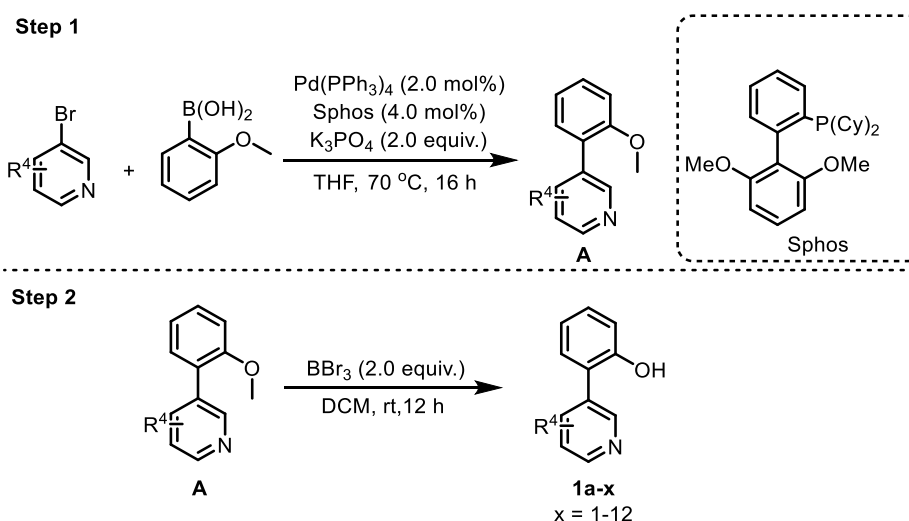

**Step 1:** In a 25 mL Schlenk tube equipped with a magnetic stir bar, were added 3-bromopyridine (2.0 mmol, 1.0 equiv.), 2-hydroxyphenylboronic acid (3.0 mmol, 1.5 equiv.), Pd(PPh<sub>3</sub>)<sub>4</sub> (2.0 mol%), Sphos (4.0 mol%), and K<sub>3</sub>PO<sub>4</sub> (4.0 mmol, 2.0 equiv.) under N<sub>2</sub> atmosphere. THF (4 mL) was injected *via* syringe. After stirring at room temperature for 30 minutes, the reaction mixture was heated to reflux for 16 h. Upon completion, the mixture was quenched with ice-cold water (10 mL) and extracted with EtOAc (3 × 10 mL). The combined organic layers were washed with brine, dried over anhydrous MgSO<sub>4</sub>, filtered, and concentrated under reduced pressure to give the crude product. The crude material was purified by silica gel chromatography (PE: EA = 3:1, v/v) to afford compound A, which was used directly in the next step.

**Step 2:** Compound A was dissolved in DCM (50 mL) in a 100 mL round-bottom flask. BBr<sub>3</sub> (4.0 mmol, 2.0 equiv.) was added dropwise at 0 °C. After complete addition, the mixture was stirred at room temperature for 12 h. Upon completion, the reaction was quenched with ice-cold water (10 mL) and extracted with EtOAc (3 × 10 mL). The combined organic layers were washed with brine, dried over anhydrous MgSO<sub>4</sub>, filtered, and concentrated under reduced pressure. The crude product was purified by silica gel chromatography (PE: EA = 1:1, v/v) to yield the directing group precursor (**1a-x**).

## 2.2 Preparation of 1 and 3

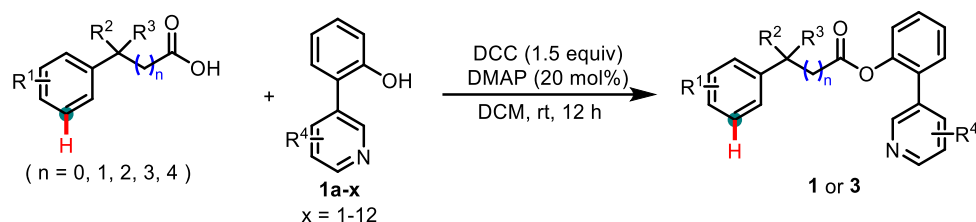

To a 50 mL round-bottom flask were added 2-phenylisobutyric acid derivative (3 mmol, 1.5 equiv.), directing group (2 mmol, 1.0 equiv.), DCC (3 mmol, 1.5 equiv.), and DMAP (0.4 mmol, 20 mol%). The mixture was dissolved in DCM and stirred at rt for 12 h. After completion, the precipitate was filtered off. The filtrate was washed with saturated brine ( $3 \times 10$  mL), and the aqueous layer was extracted with DCM. The combined organic layers were dried, concentrated under reduced pressure, and purified by column chromatography (silica gel GF254, 200–300 mesh; PE: EA = 5:1) to afford the pure product (1 or 3).

## 3. Condition screening

**Table S1. Preliminary screening of the DGs**

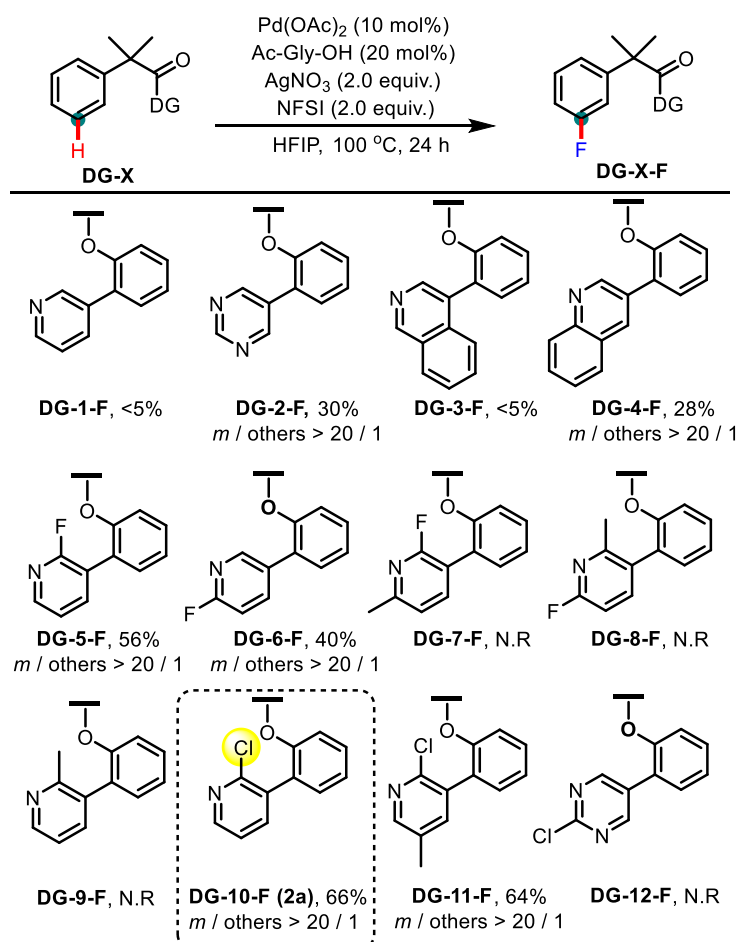

**Reaction conditions:** DG-X (0.2 mmol), Pd(OAc)<sub>2</sub> (10 mol%), Ac-Gly-OH (20 mol%), NFSI (2.0 equiv), AgNO<sub>3</sub> (2.0 equiv), HFIP (2 mL), 24 h, 100 °C; Yield is determined by GC using dodecane as an internal standard.

**Table S2. Screening of the conditions<sup>a</sup>**

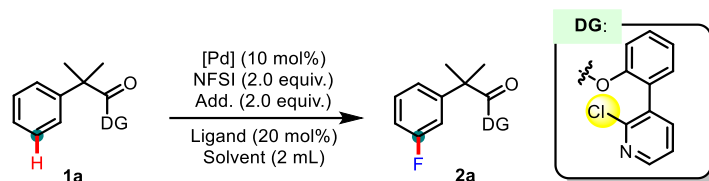

| Entry                 | [Pd]                                                 | Ligand     | Add.                    | Sol.              | Temp. (°C) | Time (h)  | Yield (%)                 |
|-----------------------|------------------------------------------------------|------------|-------------------------|-------------------|------------|-----------|---------------------------|
| 1                     | Pd(OAc) <sub>2</sub>                                 | AC-Gly-OH  | AgNO <sub>3</sub>       | HFIP              | 100        | 24        | 66                        |
| 2                     | Pd(NO <sub>3</sub> ) <sub>2</sub> ·3H <sub>2</sub> O | AC-Gly-OH  | AgNO <sub>3</sub>       | HFIP              | 100        | 24        | 16                        |
| 3                     | PdCl <sub>2</sub>                                    | AC-Gly-OH  | AgNO <sub>3</sub>       | HFIP              | 100        | 24        | 45                        |
| 4                     | Pd(PPh <sub>3</sub> ) <sub>4</sub>                   | AC-Gly-OH  | AgNO <sub>3</sub>       | HFIP              | 100        | 24        | 65                        |
| 5                     | Pd(OAc) <sub>2</sub>                                 | -          | AgNO <sub>3</sub>       | HFIP              | 100        | 24        | 70                        |
| 6                     | Pd(OAc) <sub>2</sub>                                 | TFA-Gly-OH | AgNO <sub>3</sub>       | HFIP              | 100        | 24        | 60                        |
| 7                     | -                                                    | -          | AgNO <sub>3</sub>       | HFIP              | 100        | 24        | N.R.                      |
| 8                     | Pd(OAc) <sub>2</sub>                                 | -          | -                       | HFIP              | 100        | 24        | 29                        |
| 9                     | Pd(OAc) <sub>2</sub>                                 | -          | AgOAc                   | HFIP              | 100        | 24        | 20                        |
| 10                    | Pd(OAc) <sub>2</sub>                                 | -          | AgSbF <sub>6</sub>      | HFIP              | 100        | 24        | 65                        |
| 11                    | Pd(OAc) <sub>2</sub>                                 | -          | KNO <sub>3</sub>        | HFIP              | 100        | 24        | 31                        |
| 12 <sup>b</sup>       | Pd(OAc) <sub>2</sub>                                 | -          | AgNO <sub>3</sub>       | HFIP              | 100        | 24        | 55                        |
| 13 <sup>c</sup>       | Pd(OAc) <sub>2</sub>                                 | -          | AgNO <sub>3</sub>       | HFIP              | 100        | 24        | 77                        |
| 14                    | Pd(OAc) <sub>2</sub>                                 | -          | AgNO <sub>3</sub>       | HFIP              | 80         | 24        | 55                        |
| 15                    | Pd(OAc) <sub>2</sub>                                 | -          | AgNO <sub>3</sub>       | HFIP              | 120        | 24        | 65                        |
| 16 <sup>c</sup>       | Pd(OAc) <sub>2</sub>                                 | -          | AgNO <sub>3</sub>       | HFIP              | 100        | 24        | 81                        |
| <b>17<sup>d</sup></b> | <b>Pd(OAc)<sub>2</sub></b>                           | -          | <b>AgNO<sub>3</sub></b> | <b>HFIP</b>       | <b>100</b> | <b>48</b> | <b>86(72)<sup>e</sup></b> |
| 18                    | Pd(OAc) <sub>2</sub>                                 | -          | AgNO <sub>3</sub>       | TFA               | 100        | 24        | 67                        |
| 19                    | Pd(OAc) <sub>2</sub>                                 | -          | AgNO <sub>3</sub>       | AcOH              | 100        | 24        | 20                        |
| 20                    | Pd(OAc) <sub>2</sub>                                 | -          | AgNO <sub>3</sub>       | MeNO <sub>2</sub> | 100        | 24        | 21                        |
| 21                    | Pd(OAc) <sub>2</sub>                                 | -          | AgNO <sub>3</sub>       | DCE               | 100        | 24        | 16                        |

**Reaction conditions:** <sup>a</sup>**1a** (0.2 mmol), Pd(OAc)<sub>2</sub> (10 mol%), NFSI (2.0 equiv), AgNO<sub>3</sub> (2.0 equiv), HFIP, 24 h, 100 °C; <sup>b</sup>**1a** (0.2 mmol), Pd(OAc)<sub>2</sub> (10 mol%), NFSI (2.0 equiv), AgNO<sub>3</sub> (1.0 equiv), HFIP, 24 h, 100 °C; <sup>c</sup>**1a** (0.2 mmol), Pd(OAc)<sub>2</sub> (10 mol%), NFSI (2.0 equiv), AgNO<sub>3</sub> (3.0 equiv); <sup>d</sup>**1a** (0.2 mmol), Pd(OAc)<sub>2</sub> (10 mol%), NFSI (3.0 equiv), AgNO<sub>3</sub> (3.0 equiv), HFIP, 48 h, 100 °C; Yield is determined by GC using dodecane as an internal standard; <sup>e</sup>Isolated yield.

**Table S3. Re-evaluation of DGs under ligand-free conditions**

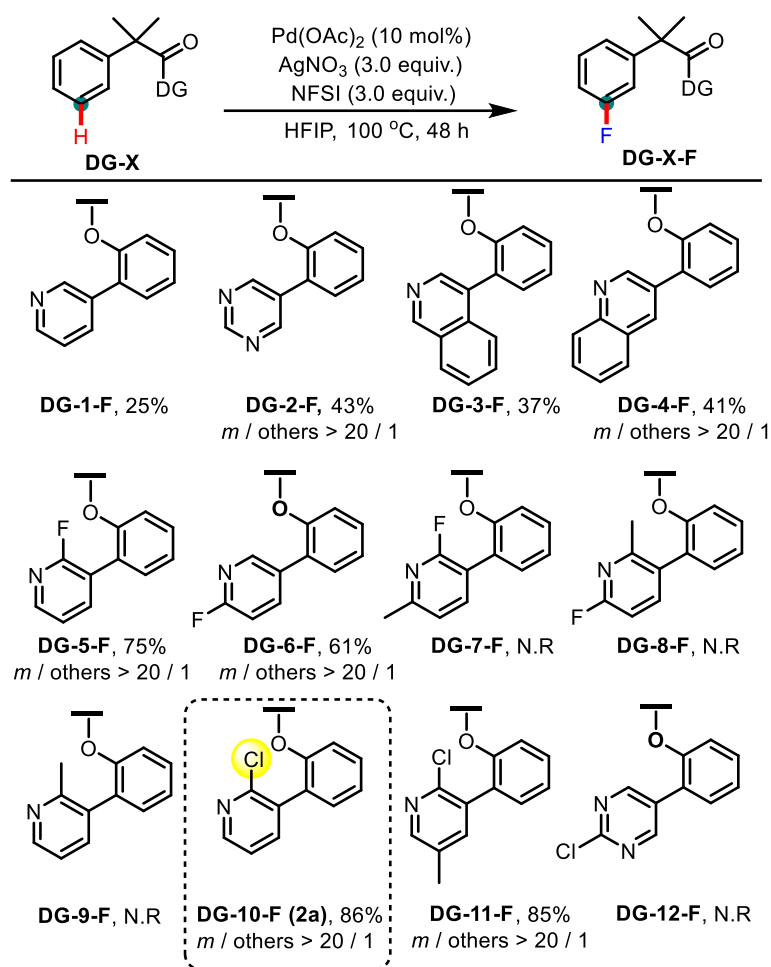

Reaction conditions: **DG-X** (0.2 mmol),  $\text{Pd}(\text{OAc})_2$  (10 mol%), NFSI (3.0 equiv.),  $\text{AgNO}_3$  (3.0 equiv.), HFIP (2.0 mL), 24 h, 100 °C; Yield is determined by GC using dodecane as an internal standard.

## 4. Typical experimental procedure

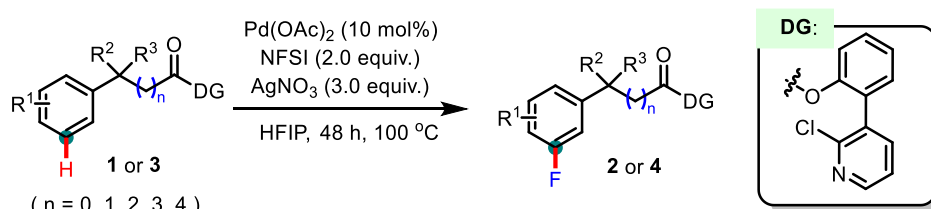

To a 15 mL Schlenk tube were added arenes acid derivative (0.2 mmol),  $\text{Pd}(\text{OAc})_2$  (10 mol%), NFSI (0.4 mmol, 2.0 equiv.), and  $\text{AgNO}_3$  (0.6 mmol, 3.0 equiv.). HFIP (2.0 mL) was added, and the mixture was stirred at 100 °C for 48 h. After completion, the reaction was cooled to room temperature and concentrated under reduced pressure. The residue was purified by column chromatography (silica gel GF254, 200–300 mesh; PE: EA = 5:1) to give the crude product, followed by separation using preparative thin-layer chromatography (TLC).

## 5. Deuterium-labelling experiments

### 5.1 Synthesis of deuterated starting material

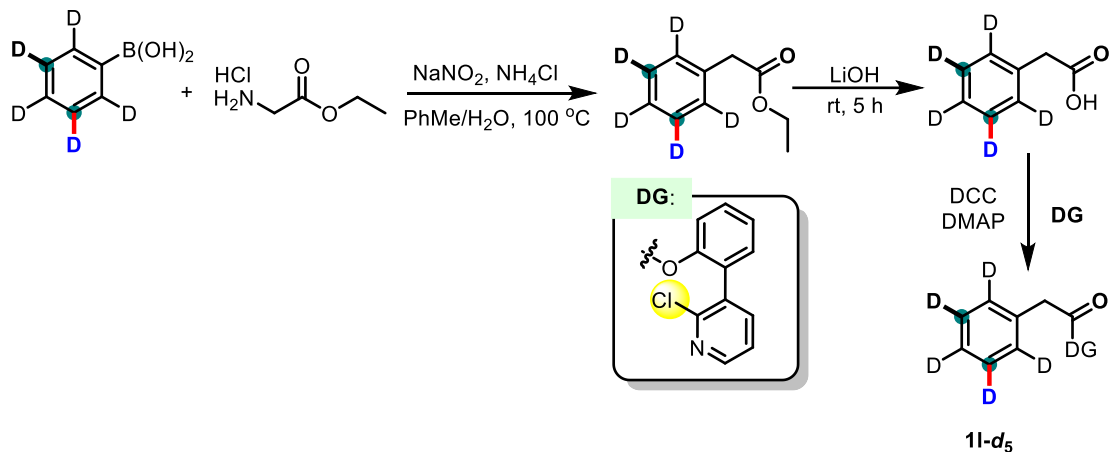

Into a Schlenk tube were added phenylboronic acid-*d*<sub>5</sub> (2 mmol), ethyl glycinate hydrochloride (3 mmol, 1.5 equiv.), sodium nitrite (3.6 mmol, 1.8 equiv.), and ammonium chloride (8 mmol, 4.0 equiv.), followed by toluene (9.5 mL) and water (0.5 mL). The mixture was stirred at 100 °C for 24 h, then cooled to room temperature and concentrated under reduced pressure to give a crude product, which was purified by column chromatography (petroleum ether/ethyl acetate = 20:1) to afford ethyl phenylacetate-*d*<sub>5</sub> in 85% yield (0.34 g). This intermediate was further hydrolyzed with LiOH (1.1 equiv.) in THF to give the target phenylacetic acid-*d*<sub>5</sub> in 61% yield (0.14 g).

To a 25 mL round-bottom flask were added phenylacetic acid-*d*<sub>5</sub>, directing group (1.2 mmol, 1.2 equiv.), DCC (1.5 mmol, 1.5 equiv.), and DMAP (20 mol%). The mixture was dissolved in DCM and stirred at rt for 12 h. After completion, the precipitate was filtered off. The filtrate was washed with saturated brine (3 × 10 mL), and the aqueous layer was extracted with DCM. The combined organic layers were dried, concentrated under reduced pressure, and purified by column chromatography (silica gel GF254, 200–300 mesh; PE: EA = 5:1) to afford the pure product **11-d<sub>5</sub>**. <sup>1</sup>H NMR (400 MHz, Chloroform-*d*) δ 8.33 (dd, *J* = 4.8, 2.0 Hz, 1H), 7.59 - 7.42 (m, 2H), 7.35 (td, *J* = 7.5, 1.2 Hz, 1H), 7.31 - 7.26 (m, 1H), 7.23 (dd, *J* = 8.1, 1.2 Hz, 1H), 7.10 (dd, *J* = 7.5, 4.8 Hz, 1H), 3.63 (s, 2H). (See **Figure S1** for details.)

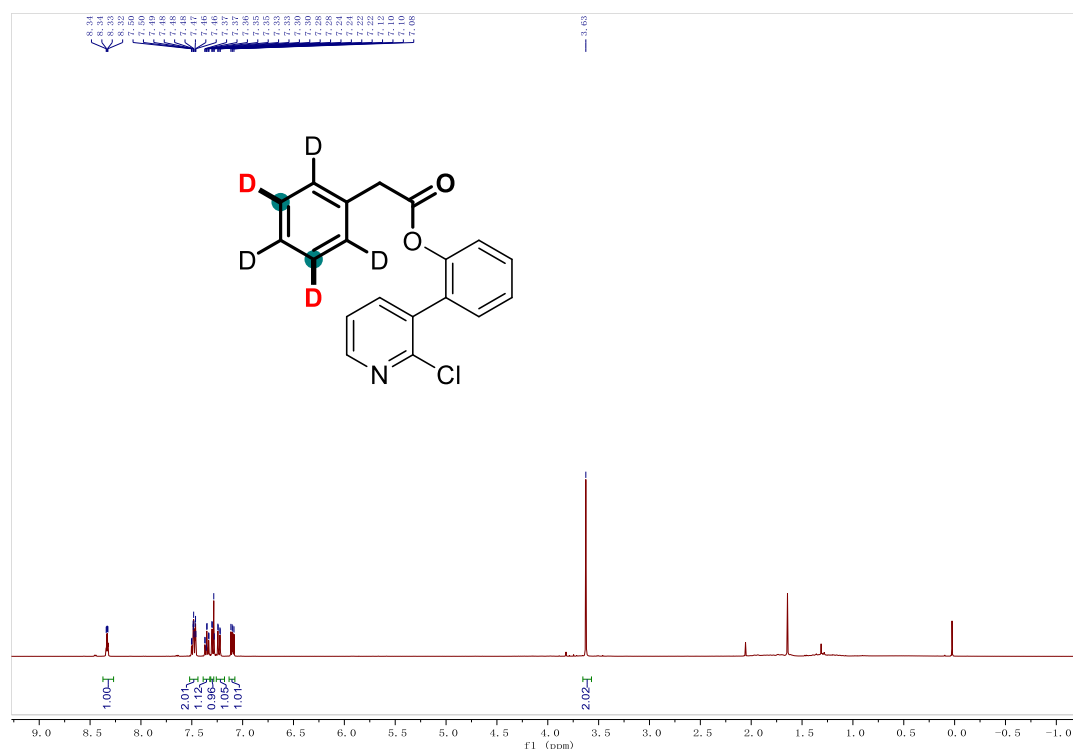

Figure S1  $^1\text{H}$  NMR spectrum of **11-d<sub>5</sub>** (400MHz,  $\text{CDCl}_3$ )

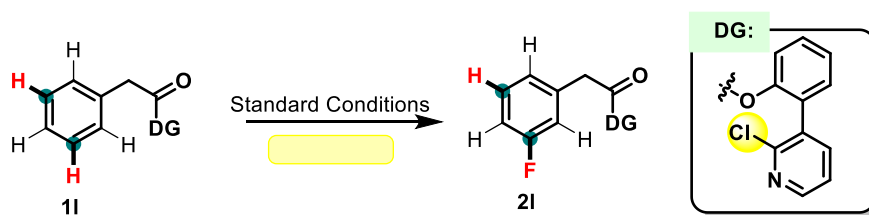

To four 15 mL Schlenk tubes were added **11** (0.025 mmol),  $\text{Pd}(\text{OAc})_2$  (10 mol%), NFSI (3.0 equiv), and  $\text{AgNO}_3$  (3.0 equiv). HFIP (1.0 mL) was added, and the resulting mixture was stirred at 100 °C for 5, 10, 15, and 20 min, respectively. Yields were determined by GC using dodecane as an internal standard.

| Time (min) | 0 | 5    | 10   | 15   | 20    |
|------------|---|------|------|------|-------|
| Yield (%)  | 0 | 4.52 | 7.41 | 13.6 | 17.17 |

H

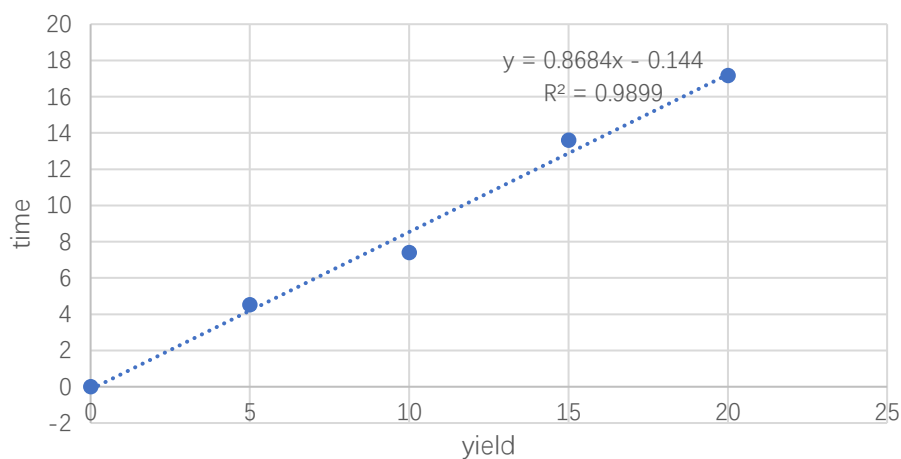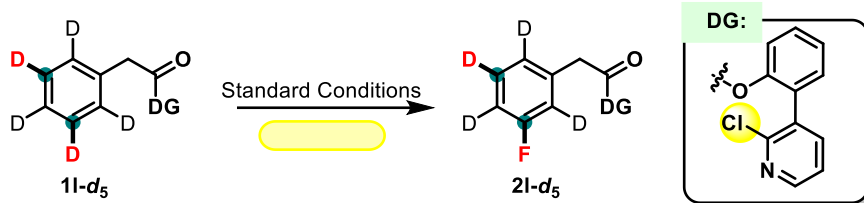

To four 15 mL Schlenk tubes were added **11-d<sub>5</sub>** (0.025 mmol), Pd(OAc)<sub>2</sub> (10 mol%), NFSI (3.0 equiv), and AgNO<sub>3</sub> (3.0 equiv). HFIP (1.0 mL) was added, and the resulting mixture was stirred at 100 °C for 10, 20, 30, and 40 min, respectively. Yields were determined by GC using dodecane as an internal standard.

| Time (min) | 0 | 10   | 20    | 30    | 40   |
|------------|---|------|-------|-------|------|
| Yield (%)  | 0 | 7.29 | 10.88 | 13.73 | 18.4 |

D

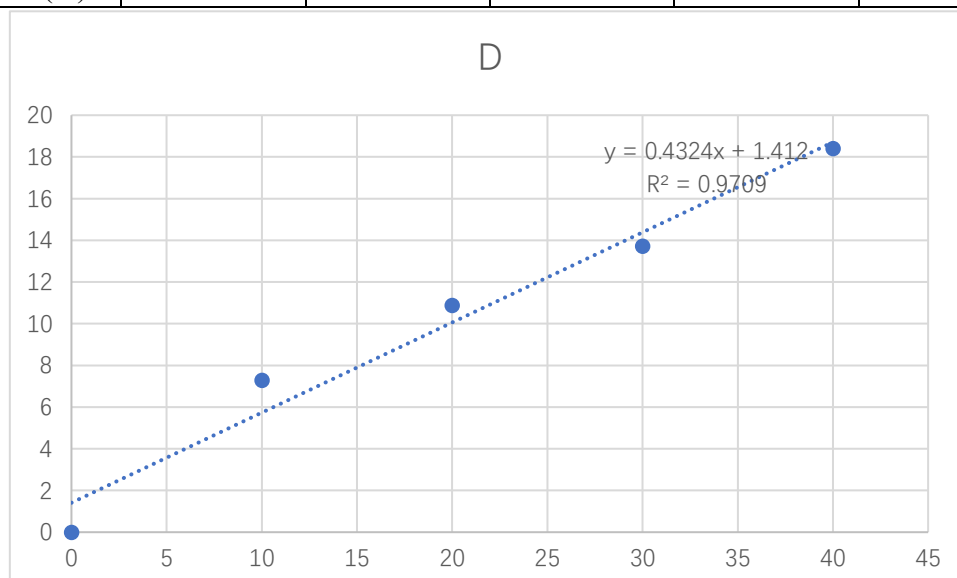

On the basis of the above experiments, a KIE value of 2.0 was obtained.

## 5.2 Synthesis of deuterated starting material

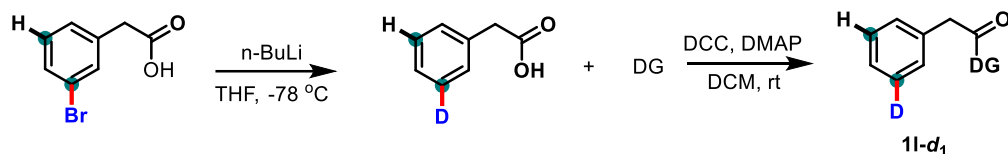

To a solution of 2-(3-bromophenyl) acetic acid<sup>8</sup> (1.0 mmol) in THF (6 mL) at -78 °C was added *n*-BuLi (3.0 mmol, 1.6 M in hexanes, 3.0 equiv.) dropwise. After stirring at -78 °C for 10 min, the mixture was warmed to 0 °C. D<sub>2</sub>O (0.6 mL) was added dropwise, and stirring was continued at room temperature for 30 min. The reaction was quenched with H<sub>2</sub>O (10 mL). THF and hexanes were removed under reduced pressure, and the aqueous layer was washed with CH<sub>2</sub>Cl<sub>2</sub> (3 × 10 mL). The aqueous phase was acidified with conc. aq. HCl to pH ≈ 1 and extracted with CH<sub>2</sub>Cl<sub>2</sub> (3 × 10 mL). The combined organic extracts were dried over MgSO<sub>4</sub>, concentrated under reduced pressure to afford crude product without further purification. Then put it to a 25 mL round-bottom flask, added **DG-10** (1.1 mmol, 1.1 equiv.), DCC (2 mmol, 2.0 equiv.), and DMAP (0.2 mmol, 20 mol%). The mixture was dissolved in DCM and stirred at rt for 12 h. After completion, the precipitate was filtered off. The filtrate was washed with saturated brine (3 × 10 mL), and the aqueous layer was extracted with DCM. The combined organic layers were dried, concentrated under reduced pressure, and purified by column chromatography (silica gel GF254, 200–300 mesh; PE: EA = 5:1) to afford the pure product **11-d<sub>1</sub>** (0.187 g, yield 58%) (96% D). <sup>1</sup>H NMR (400 MHz, DMSO-*d*<sub>6</sub>) δ 8.43 (dd, *J* = 4.8, 1.9 Hz, 1H), 7.62 (dd, *J* = 7.6, 1.9 Hz, 1H), 7.53 (ddd, *J* = 8.3, 5.5, 3.7 Hz, 1H), 7.42 - 7.36 (m, 3H), 7.32 (d, *J* = 8.1 Hz, 1H), 7.23 (dd, *J* = 4.6, 2.0 Hz, 3H), 7.00 (dd, *J* = 6.6, 2.9 Hz, 2H), 3.68 (s, 2H). (See **Figure S2** for details.)

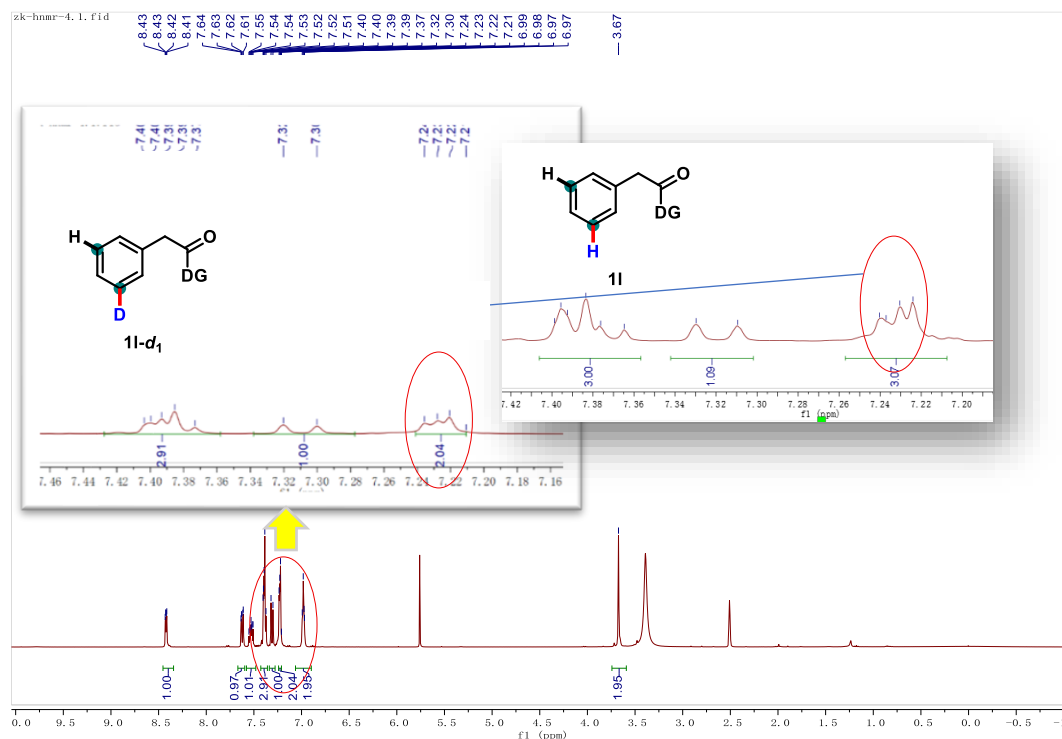

**Figure S2** <sup>1</sup>H NMR spectrum of 11-d<sub>1</sub> (400MHz, DMSO-*d*<sub>6</sub>)

### 5.3 Deuterium-labelling experiments

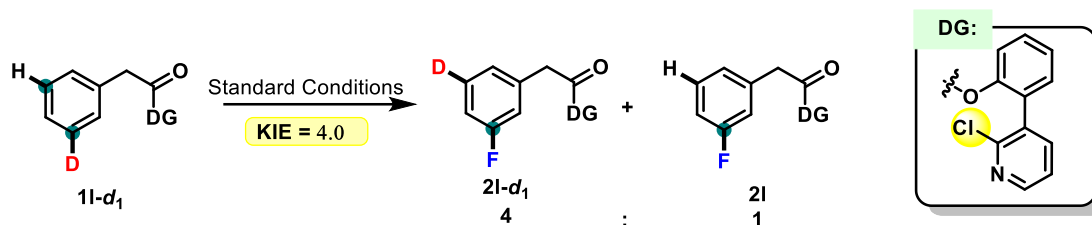

To a 15 mL Schlenk tube were added **11-d<sub>1</sub>** (0.2 mmol), Pd(OAc)<sub>2</sub> (10 mol%), NFSI (0.4 mmol, 2.0 equiv.), and AgNO<sub>3</sub> (0.6 mmol, 3.0 equiv.). HFIP (2.0 mL) was added, and the mixture was stirred at 100 °C for 2 h. After completion, the reaction was cooled to room temperature and concentrated under reduced pressure. The residue was purified by column chromatography (silica gel GF254, 200–300 mesh; PE: EA = 5:1) to give the crude product, followed by separation using preparative Thin-layer chromatography (PE: EA = 7:1) to afford the pure product (0.019 g, yield 29%). The ratio of **21** to **21-d<sub>1</sub>** was determined to be 1:4 by <sup>1</sup>H NMR analysis, based on the integration of characteristic hydrogen resonances. (See **Figure S3** for details.)

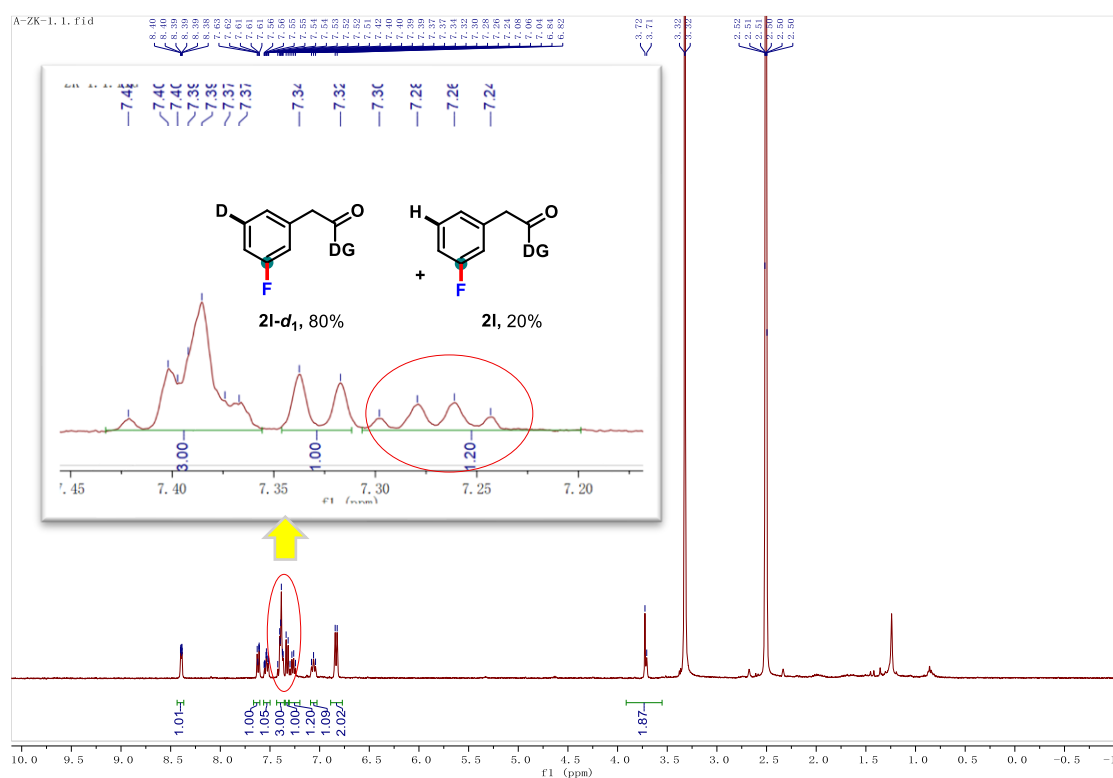

**Figure S3** <sup>1</sup>H NMR spectrum of **21** & **21-d<sub>1</sub>** (400MHz, DMSO-*d*<sub>6</sub>)

## 6. X-Ray analysis for 2h

CCDC numbers 2366841 (**2h**) contain the supplementary crystallographic data for this paper. These data can be obtained free of charge from The Cambridge Crystallographic Data Centre *via* [www.ccdc.cam.ac.uk/data\\_request/cif](http://www.ccdc.cam.ac.uk/data_request/cif).

Single crystals suitable for X-ray crystallography was grown by slow evaporation of the prepared solution in CH<sub>2</sub>Cl<sub>2</sub> and petroleum ether at room temperature.

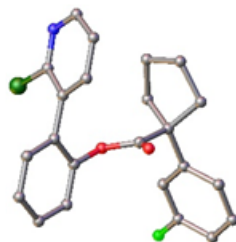

**Figure S4.** X-ray structure of **2h**

**Table 1** Crystal data and structure refinement for **2h**.

|                                    |                                                               |
|------------------------------------|---------------------------------------------------------------|
| identification code                | <b>2h</b>                                                     |
| Empirical formula                  | C <sub>23</sub> H <sub>19</sub> ClFNO <sub>2</sub>            |
| Formula weight                     | 395.84                                                        |
| Temperature/K                      | 193.00                                                        |
| Crystal system                     | monoclinic                                                    |
| Space group                        | C2/c                                                          |
| a/Å                                | 33.0613(18)                                                   |
| b/Å                                | 7.2094(4)                                                     |
| c/Å                                | 15.6708(8)                                                    |
| α/°                                | 90                                                            |
| β/°                                | 91.011(2)                                                     |
| γ/°                                | 90                                                            |
| Volume/Å <sup>3</sup>              | 3734.6(3)                                                     |
| Z                                  | 8                                                             |
| ρ <sub>calc</sub> /cm <sup>3</sup> | 1.408                                                         |
| μ/mm <sup>-1</sup>                 | 1.350                                                         |
| F(000)                             | 1648.0                                                        |
| Crystal size/mm <sup>3</sup>       | 0.13 × 0.12 × 0.1                                             |
| Radiation                          | GaKα (λ = 1.34139)                                            |
| 2θ range for data collection/°     | 4.652 to 120.572                                              |
| Index ranges                       | -41 ≤ h ≤ 42, -8 ≤ k ≤ 9, -20 ≤ l ≤ 20                        |
| Reflections collected              | 23529                                                         |
| Independent reflections            | 4123 [R <sub>int</sub> = 0.0355, R <sub>sigma</sub> = 0.0237] |
| Data/restraints/parameters         | 4123/0/253                                                    |
| Goodness-of-fit on F <sup>2</sup>  | 1.045                                                         |

Final R indexes [ $I \geq 2\sigma(I)$ ]  $R_1 = 0.0378$ ,  $wR_2 = 0.0957$   
 Final R indexes [all data]  $R_1 = 0.0450$ ,  $wR_2 = 0.1003$   
 Largest diff. peak/hole /  $e \text{ \AA}^{-3}$  0.27/-0.35

## 7. Determination of the structure of the target compounds

### 7.1 Synthesis of reference molecules for identifying 4a

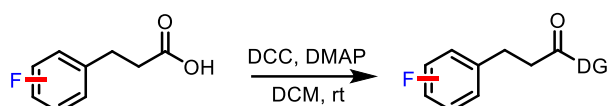

To a 25 mL round-bottom flask were added fluoro-substituted 3-phenylpropanoic acid derivatives (3.0 mmol, 1.5 equiv.), directing group (2 mmol, 1.0 equiv.), DCC (4 mmol, 2.0 equiv.), and DMAP (0.4 mmol, 20 mol%). The mixture was dissolved in DCM and stirred at rt for 12 h. After completion, the precipitate was filtered off. The filtrate was washed with saturated brine ( $3 \times 10 \text{ mL}$ ), and the aqueous layer was extracted with DCM. The combined organic layers were dried, concentrated under reduced pressure, and purified by column chromatography (silica gel GF254, 200–300 mesh; PE: EA = 5:1) to afford the pure product in 87% yield. (all the fluoro-substituted 3-phenylpropanoic acid derivatives were purchased from Bide Pharmatech Co., Ltd.)

### *ortho*-Fluoro-substituted 3-phenylpropanoic acid derivatives:

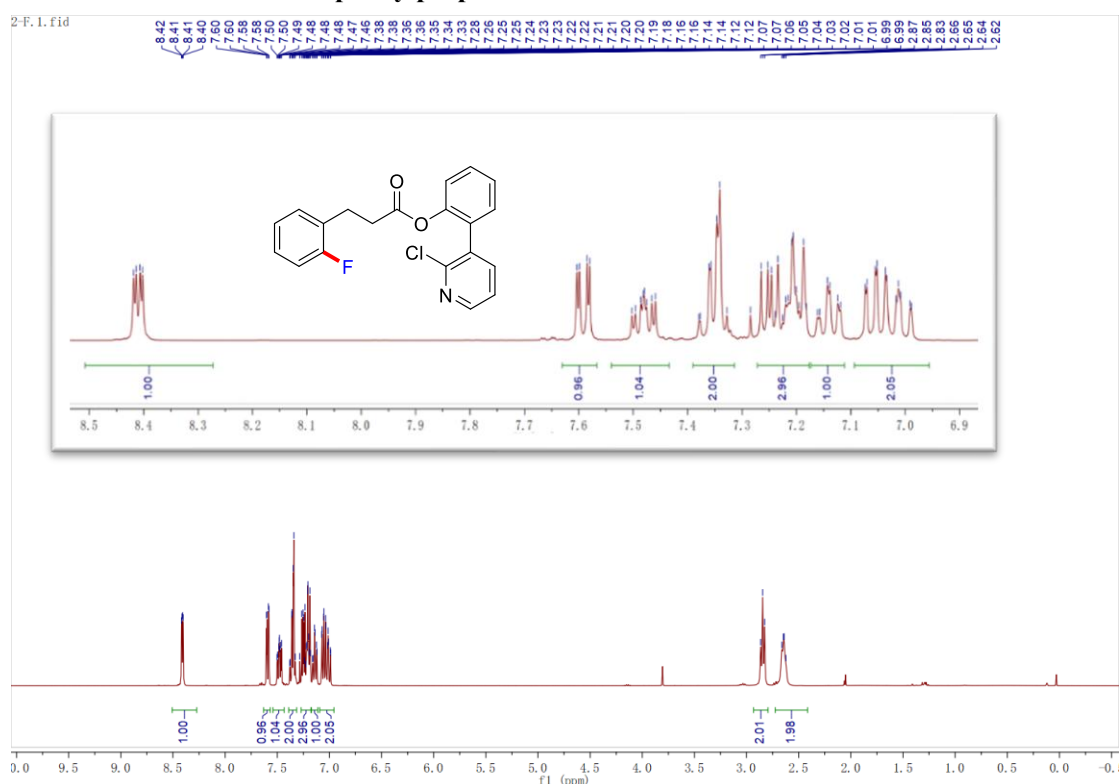

Figure S5  $^1\text{H}$  NMR spectrum of *ortho*-fluoride (400 MHz,  $\text{CDCl}_3$ )

### *meta*-Fluoro-substituted 3-phenylpropanoic acid derivatives:

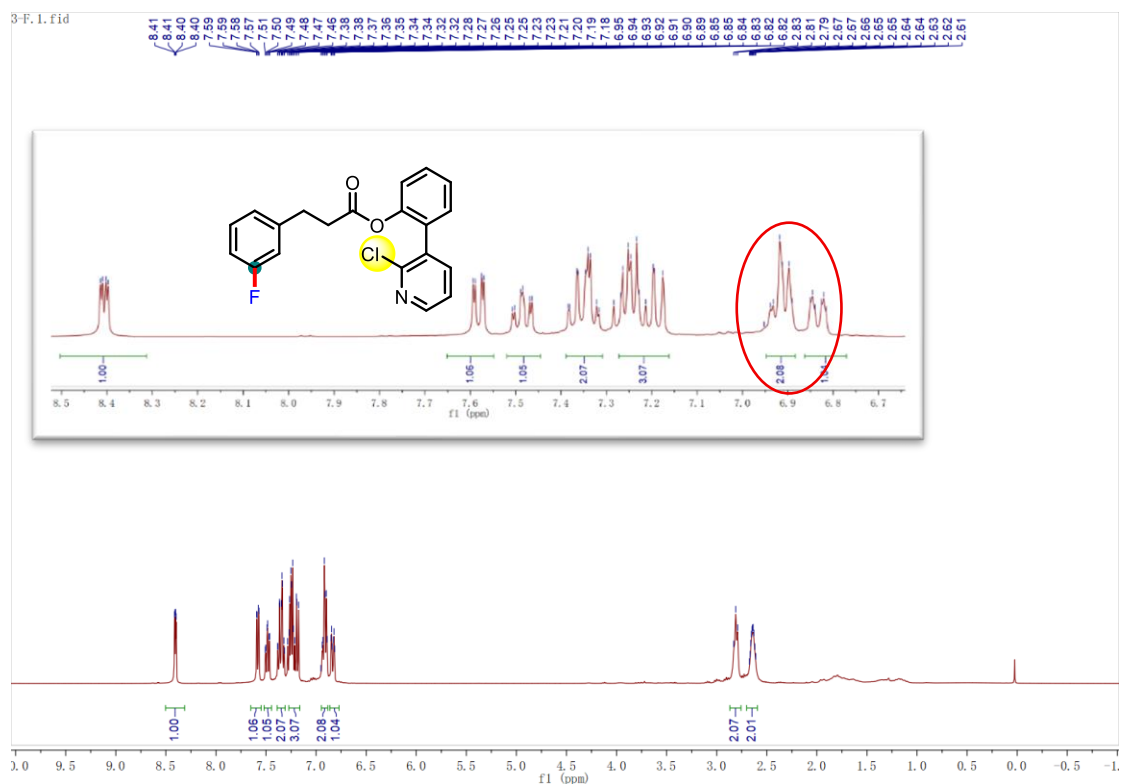

***para*-Fluoro-substituted 3-phenylpropanoic acid derivatives:**

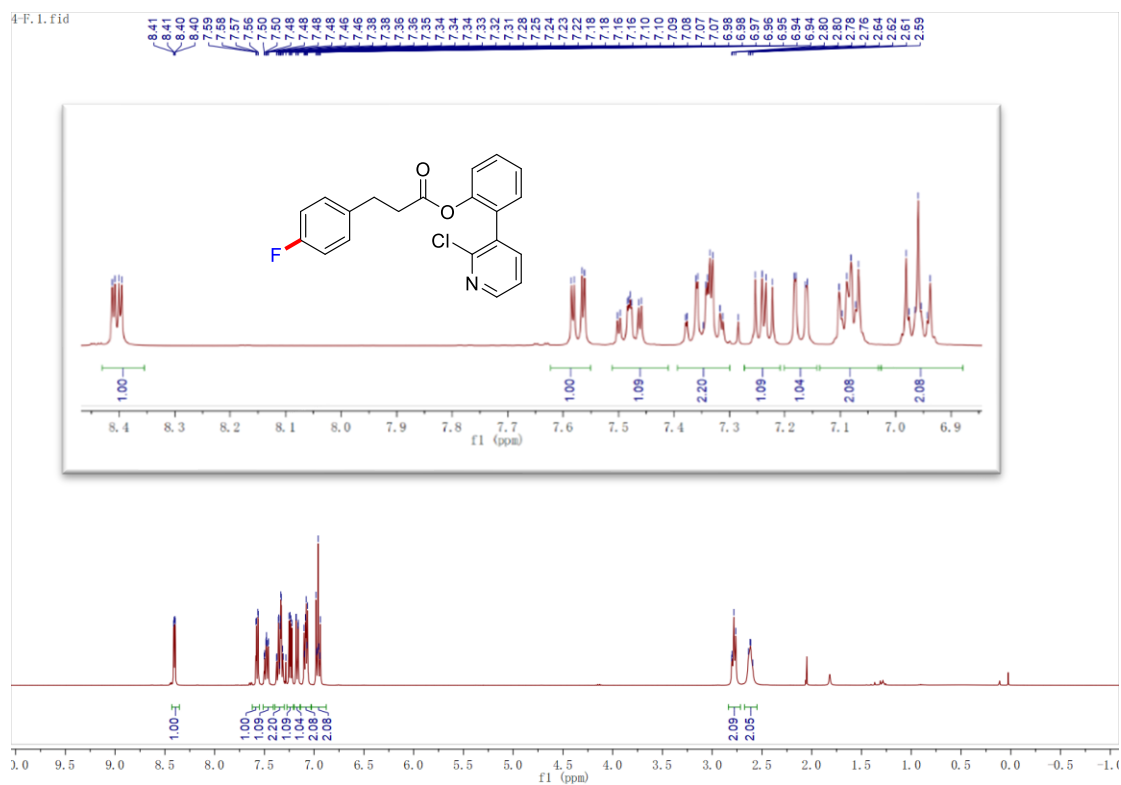

Upon comparison with the synthesized target product, we found that the *meta*-fluorinated product

exhibits a  $^1\text{H}$  NMR spectrum completely identical to that of the target. (See *Figure S5, S6, S7, S8* for details.)

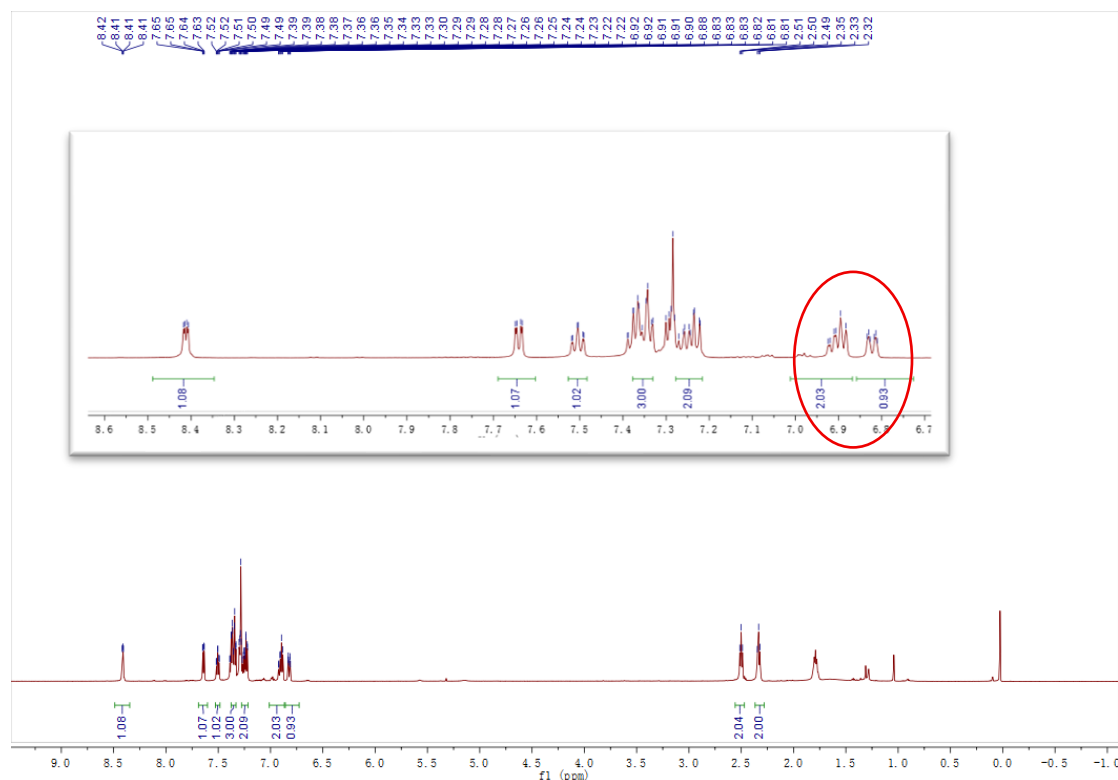

**Figure S8**  $^1\text{H}$  NMR spectrum of 4a (400 MHz,  $\text{CDCl}_3$ )

## 7.2 Synthesis of reference molecules for identifying 4h

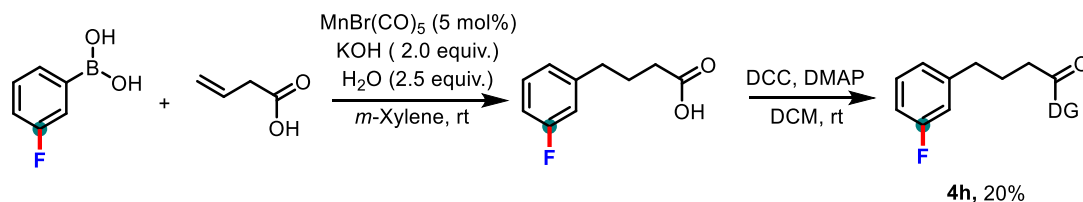

### Step 1<sup>9</sup>:

To a 25 mL flask equipped with a magnetic stir bar were added  $\text{MnBr(CO)}_5$  (5 mol%), alkene (1.0 mmol, 1.0 equiv.), boronic acid (2.0 mmol, 2.0 equiv.), KOH (2.0 mmol, 2.0 equiv.),  $\text{H}_2\text{O}$  (2.5 equiv.), and *m*-xylene (6 mL) under argon. The mixture was stirred at room temperature for 24 h, then concentrated and diluted with 1 M HCl (5 mL). The aqueous layer was extracted with  $\text{Et}_2\text{O}$  ( $3 \times 10$  mL). The combined organic layers were concentrated in vacuo to afford the crude intermediate.

### Step 2:

This intermediate was transferred to a 25 mL round-bottom flask, followed by addition of **DG-10** (1.1 mmol, 1.1 equiv.), DCC (2.0 mmol, 2.0 equiv.), and DMAP (0.2 mmol, 20 mol%). The mixture was dissolved in DCM and stirred at room temperature for 12 h. After reaction completion, the precipitate was filtered off. The filtrate was washed with saturated brine ( $3 \times 10$  mL), and the aqueous layer was back-extracted with DCM. The combined organic phases were dried, concentrated under reduced pressure, and purified by column chromatography (silica gel GF254, 200–300 mesh; PE: EA = 5:1) to give the pure product in 34% yield.

**meta-Fluoro-substituted 3-phenylbutyric acid derivatives:**

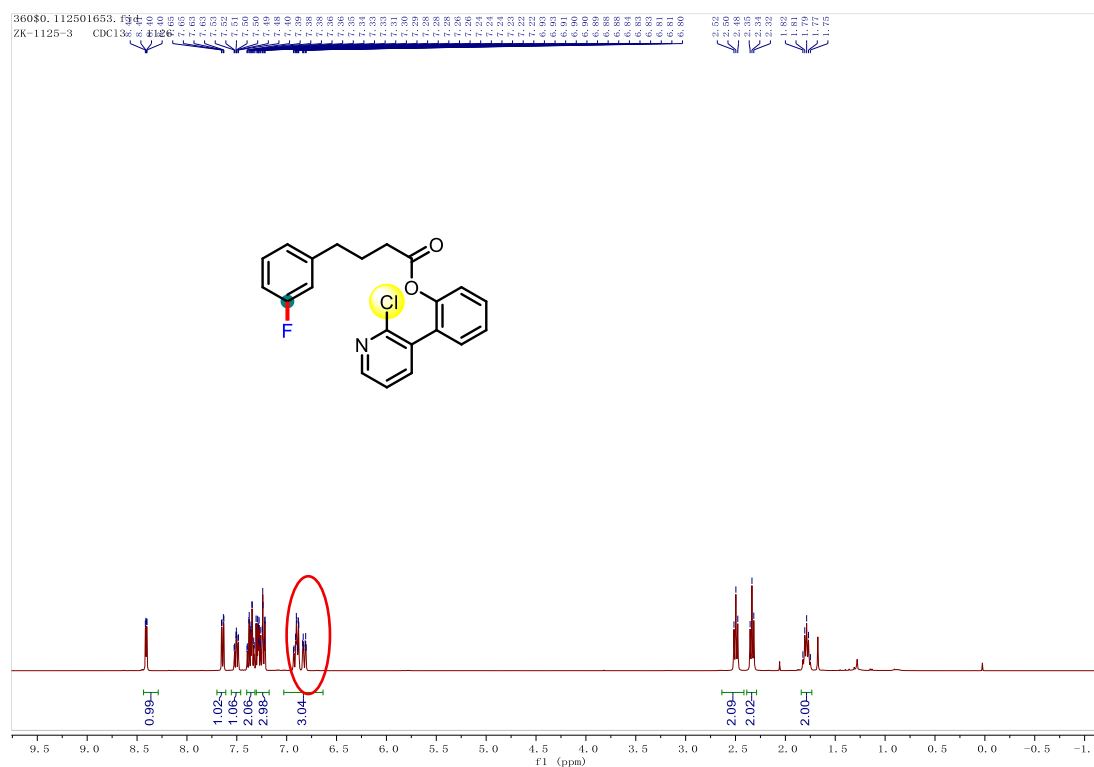

**Figure S9** <sup>1</sup>H NMR spectrum of *meta*-fluoride (400 MHz, CDCl<sub>3</sub>)

Upon comparison with the synthesized target product, we found that the *meta*-fluorinated product exhibits a <sup>1</sup>H NMR spectrum completely identical to that of the target. (See **Figure S9, S10** for details.)

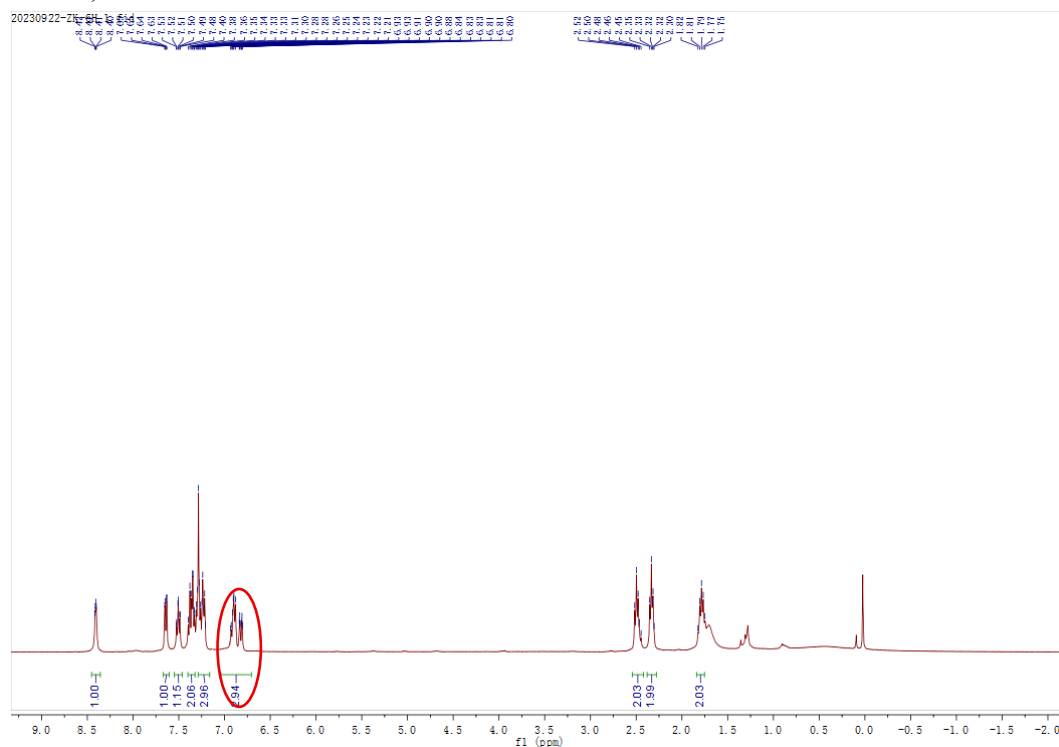

**Figure S10** <sup>1</sup>H NMR spectrum of 4h (400 MHz, CDCl<sub>3</sub>)

## 8. Further transformation

### 8.1 Gram-scale reaction

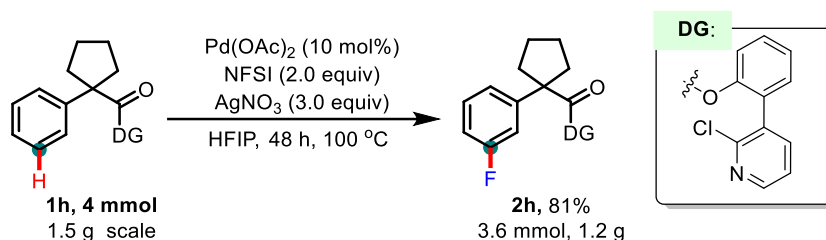

To a 50 mL tube were added **1h** (4.0 mmol, 1.5 g), Pd(OAc)<sub>2</sub> (10 mol%), NFSI (2.0 equiv.), and AgNO<sub>3</sub> (3.0 equiv.). HFIP (10.0 mL) was added, and the mixture was stirred at 100 °C for 48 h. After completion, the reaction was cooled to room temperature and concentrated under reduced pressure. The residue was purified by column chromatography (silica gel GF254, 200–300 mesh; PE: EA = 5:1) to give the crude product **2h**, followed by separation using preparative Thin-layer chromatography (PE: EA = 7:1) to give the pure product (1.2 g, yield 81%)

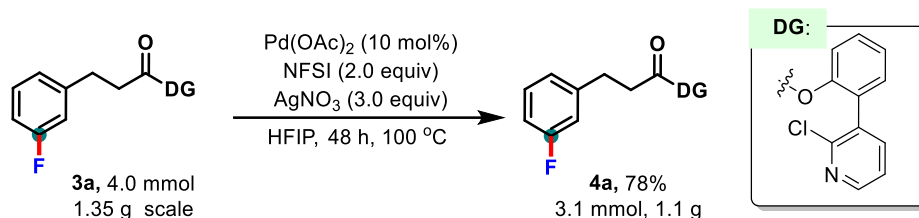

To a 50 mL tube were added **3a** (4.0 mmol, 1.35 g), Pd(OAc)<sub>2</sub> (10 mol%), NFSI (2.0 equiv.), and AgNO<sub>3</sub> (3.0 equiv.). HFIP (10.0 mL) was added, and the mixture was stirred at 100 °C for 48 h. After completion, the reaction was cooled to room temperature and concentrated under reduced pressure. The residue was purified by column chromatography (silica gel GF254, 200–300 mesh; ethyl acetate/petroleum ether = 1:5) to give the crude product, followed by separation using preparative Thin-layer chromatography (PE: EA = 7:1), affording the pure product **4a** (1.1 g, yield 78%).

### 8.2 Removal of the directing group

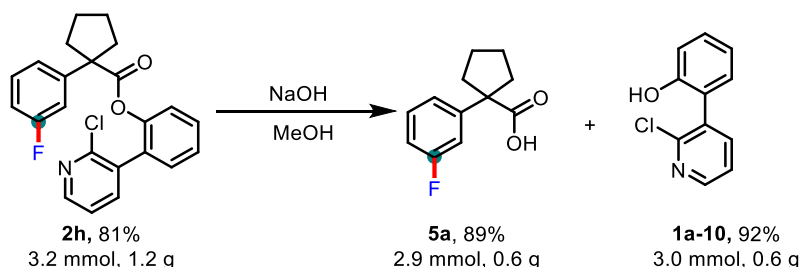

To a 50 mL round-bottom flask were added compound **2h** (3.6 mmol) and NaOH (4.0 equiv). The mixture was dissolved in MeOH (20 mL) and stirred at 70 °C for 24 h. After cooling to room temperature, the mixture was concentrated under reduced pressure. The residue was partitioned between ethyl acetate (20 mL) and water (20 mL). The aqueous layer was acidified with HCl to pH 3–4, washed with saturated brine (3 × 5 mL), and extracted with ethyl acetate. The combined organic layers were dried, filtered, and concentrated. Purification by column chromatography (silica gel

GF254, 200-300 mesh; PE: EA = 5:1) afforded pure product **5a** (0.6 g, 72% yield). **<sup>1</sup>H NMR** (400 MHz, Chloroform-*d*)  $\delta$  7.31 - 7.21 (m, 1H), 7.16 (d,  $J = 7.9$  Hz, 1H), 7.10 (dt,  $J = 10.5, 2.2$  Hz, 1H), 6.97 - 6.89 (m, 1H), 2.62 (dd,  $J = 12.6, 5.2$  Hz, 2H), 1.95 - 1.83 (m, 2H), 1.74 (p,  $J = 3.1$  Hz, 4H). **<sup>13</sup>C NMR** (101 MHz, Chloroform-*d*)  $\delta$  181.7, 162.7 (d,  $J = 245.5$  Hz), 145.2 (d,  $J = 7.0$  Hz), 129.7 (d,  $J = 8.3$  Hz), 122.8, 114.4 (d,  $J = 21.7$  Hz), 113.9 (d,  $J = 20.8$  Hz), 58.7 (d,  $J = 1.7$  Hz), 36.0 (2C), 23.5 (2C). **<sup>19</sup>F NMR** (376 MHz, Chloroform-*d*)  $\delta$  -112.99. **HRMS (ESI-TOF)**: calcd.  $[M+Na]^+$  247.1107; found: 247.1110.

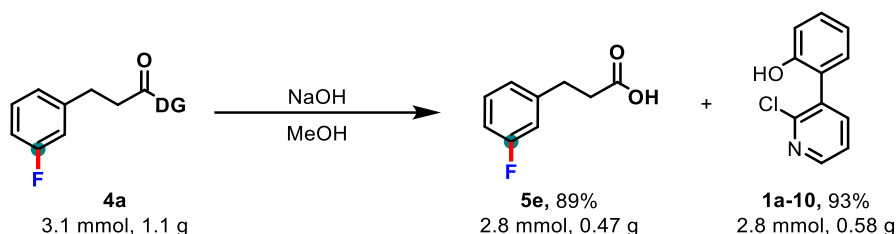

To a 50 mL round-bottom flask were added compound **4a** (3.1 mmol) and NaOH (4.0 equiv). The mixture was dissolved in MeOH (20 mL) and stirred at 70 °C for 24 h. After cooling to room temperature, the mixture was concentrated under reduced pressure. The residue was partitioned between ethyl acetate (20 mL) and water (20 mL). The aqueous layer was acidified with HCl to pH 3-4, washed with saturated brine (3  $\times$  5 mL), and extracted with ethyl acetate. The combined organic layers were dried, filtered, and concentrated. Purification by column chromatography (silica gel GF254, 200–300 mesh; PE: EA = 5:1) afforded pure product **5e** (0.47 g, 70% yield). **<sup>1</sup>H NMR** (400 MHz, Chloroform-*d*)  $\delta$  8.75 (s, 1H), 7.25 (tdd,  $J = 7.8, 6.2, 1.9$  Hz, 1H), 7.02 - 6.95 (m, 1H), 6.94 - 6.85 (m, 2H), 2.95 (t,  $J = 7.7$  Hz, 2H), 2.68 (dd,  $J = 8.2, 7.2$  Hz, 2H). **<sup>13</sup>C NMR** (101 MHz, Chloroform-*d*)  $\delta$  178.8, 163.0 (d,  $J = 245.6$  Hz), 142.7 (d,  $J = 7.3$  Hz), 130.0 (d,  $J = 8.4$  Hz), 123.9, 115.2 (d,  $J = 21.2$  Hz), 113.3 (d,  $J = 21.1$  Hz), 35.2, 30.2 (d,  $J = 1.7$  Hz). **<sup>19</sup>F NMR** (376 MHz, Chloroform-*d*)  $\delta$  -113.31. **HRMS (ESI-TOF)**: calcd.  $[M+Na]^+$  191.0479; found: 191.0477.

### 8.3 Other transformations

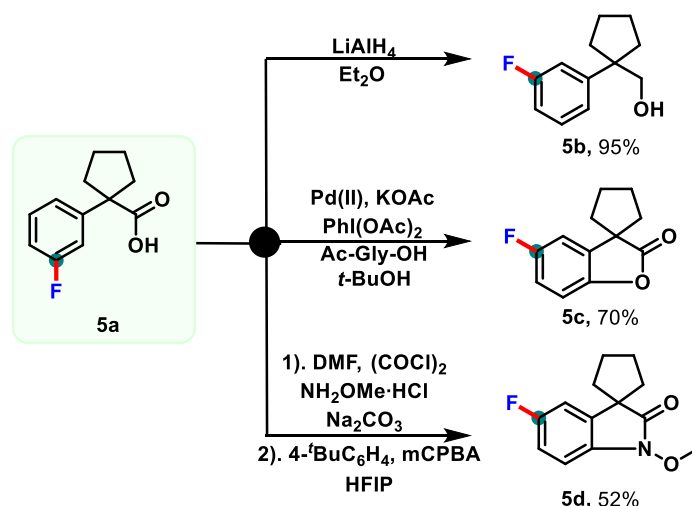

**Synthesis of 5b:** A magnetically stirred Schlenk tube was charged with compound **5a** (0.2 mmol) and dry Et<sub>2</sub>O (1.0 mL). LiAlH<sub>4</sub> (0.3 mmol) was added slowly at 0 °C, and the resulting mixture was stirred at this temperature for 6 h. The reaction was quenched by the careful addition of saturated aqueous NH<sub>4</sub>Cl. The mixture was extracted with ethyl acetate (3  $\times$  2.0 mL). The combined organic

extracts were washed with brine, dried over anhydrous MgSO<sub>4</sub>, filtered, and concentrated *in vacuo*. Purification by flash column chromatography (silica gel, PE: EA = 5:1) yielded compound **5b** (36 mg, 95% yield). <sup>1</sup>H NMR (400 MHz, Chloroform-*d*) δ 7.28 (q, *J* = 8.4, 7.8 Hz, 1H), 7.08 (d, *J* = 7.8 Hz, 1H), 7.02 (dd, *J* = 10.9, 2.3 Hz, 1H), 6.90 (td, *J* = 8.4, 2.6 Hz, 1H), 3.52 (s, 2H), 1.99 (dd, *J* = 12.1, 5.9 Hz, 2H), 1.91 - 1.79 (m, 2H), 1.72 (q, *J* = 4.7, 3.3 Hz, 4H). <sup>13</sup>C NMR (101 MHz, Chloroform-*d*) δ 162.88 (d, *J* = 245.3 Hz), 149.82 (d, *J* = 6.6 Hz), 129.64 (d, *J* = 8.3 Hz), 122.88, 115.18, 112.97 (d, *J* = 21.1 Hz), 70.12 (d, *J* = 2.0 Hz), 53.37 (d, *J* = 1.7 Hz), 34.39 (2C), 23.82 (2C). <sup>19</sup>F NMR (376 MHz, Chloroform-*d*) δ -113.19. HRMS (ESI-TOF): calcd. [M+Na]<sup>+</sup> 217.1005; found: 217.1012.

**Synthesis of 5c<sup>3</sup>**: To a mixture of compound **5a** (0.2 mmol, 1.0 equiv.), Pd(OAc)<sub>2</sub> (2.2 mg, 0.01 mmol, 5 mol%), N-protected amino acid (0.06 mmol, 0.3 equiv.), KOAc (39.2 mg, 0.4 mmol, 2.0 equiv.), and PhI(OAc)<sub>2</sub> (96.6 mg, 0.3 mmol, 1.5 equiv.) in a 35 mL sealed tube was added <sup>t</sup>BuOH (2.0 mL). The tube was sealed with a PTFE-lined cap and stirred at 100 °C under air for 12 h. After cooling to room temperature, the mixture was concentrated *in vacuo*. The residue was purified by column chromatography on silica gel using a gradient of petroleum ether and dichloromethane to afford the target product **5c** (29 mg, 70% yield). <sup>1</sup>H NMR (400 MHz, Chloroform-*d*) δ 7.04 (ddt, *J* = 8.6, 4.2, 2.5 Hz, 1H), 7.01 - 6.78 (m, 2H), 2.34 - 2.21 (m, 2H), 2.18 - 2.04 (m, 2H), 2.04 - 1.87 (m, 4H). <sup>13</sup>C NMR (101 MHz, Chloroform-*d*) δ 181.5, 159.7 (d, *J* = 242.0 Hz), 148.2, 135.7, 114.7 (d, *J* = 23.9 Hz), 111.4 (d, *J* = 8.5 Hz), 110.1 (d, *J* = 29.6 Hz), 52.7, 39.7 (2C), 26.4 (2C). <sup>19</sup>F NMR (376 MHz, Chloroform-*d*) δ -117.92. HRMS (ESI-TOF): calcd. [M+Na]<sup>+</sup> 229.2056; found: 229.2056.

**Synthesis of 5d<sup>4</sup>**: To a solution of compound **5a** (1.0 mmol, 1.0 equiv.) in dry DCM (2 mL) at 0 °C were added DMF (0.2 mmol, 0.2 equiv.) and oxalyl chloride (2.0 mmol, 2.0 equiv.). The mixture was stirred at room temperature for 4 h and then concentrated *in vacuo*. The residue was dissolved in toluene (2 mL). Separately, a solution of methoxyamine hydrochloride (2.2 mmol, 1.1 equiv.) and Na<sub>2</sub>CO<sub>3</sub> (2.0 mmol, 2.0 equiv.) in toluene/water (v/v = 1:1) was prepared at 0 °C. The two solutions were combined and stirred at room temperature overnight. The mixture was extracted with ethyl acetate, and the organic phase was concentrated to give the crude intermediate. A reaction tube charged with the crude intermediate (0.1 mmol, 1.0 equiv.) and *p*-tert-butyl iodobenzene (20 mol%) was treated with *m*-CPBA (0.13 mmol, 1.3 equiv.) in HFIP (1.0 mL). After stirring at room temperature for 8 h, the reaction was quenched with saturated aqueous NaHCO<sub>3</sub> and extracted with DCM (3 × 5 mL). The combined organic layers were dried over anhydrous Na<sub>2</sub>SO<sub>4</sub>, concentrated *in vacuo*, and purified by flash column chromatography (silica gel, petroleum ether/EtOAc gradient) to afford the target product **5c** (122 mg, 52% yield). <sup>1</sup>H NMR (400 MHz, Chloroform-*d*) δ 7.02 - 6.82 (m, 3H), 4.01 (s, 3H), 2.25 - 2.14 (m, 2H), 2.13 - 2.00 (m, 2H), 1.99 - 1.88 (m, 2H), 1.89 - 1.79 (m, 2H). <sup>13</sup>C NMR (101 MHz, Chloroform-*d*) δ 176.2, 159.7 (d, *J* = 240.8 Hz), 135.2 (d, *J* = 1.9 Hz), 134.8 (d, *J* = 7.8 Hz), 113.8 (d, *J* = 23.9 Hz), 110.8 (d, *J* = 24.9 Hz), 107.6 (d, *J* = 8.1 Hz), 63.4, 52.9 (d, *J* = 1.8 Hz), 38.0 (2C), 26.6 (2C). <sup>19</sup>F NMR (376 MHz, Chloroform-*d*) δ -119.86. HRMS (ESI-TOF): calcd. [M+Na]<sup>+</sup> 258.2476; found: 258.2476.

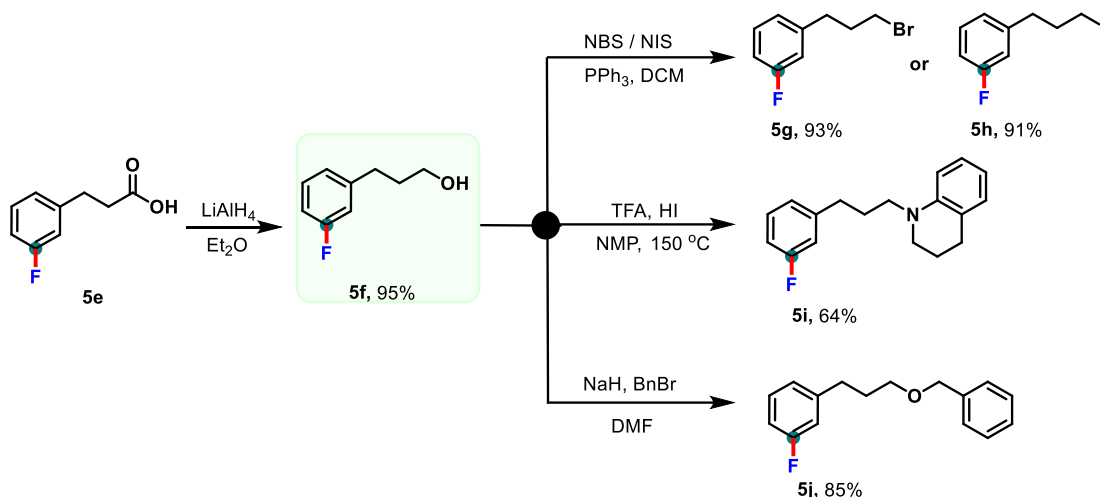

**Synthesis of 5f:** A magnetically stirred Schlenk tube was charged with compound **5e** (2.8 mmol) and dry  $\text{Et}_2\text{O}$  (15.0 mL).  $\text{LiAlH}_4$  (4.0 mmol) was added slowly at  $0^\circ\text{C}$ , and the resulting mixture was stirred at this temperature for 6 h. The reaction was quenched by the careful addition of saturated aqueous  $\text{NH}_4\text{Cl}$ . The mixture was extracted with ethyl acetate ( $3 \times 2.0$  mL). The combined organic extracts were washed with brine, dried over anhydrous  $\text{MgSO}_4$ , filtered, and concentrated *in vacuo*. Purification by flash column chromatography (silica gel, PE: EA = 5:1) yielded compound **5f** (0.41 g, yield 95%).  $^1\text{H NMR}$  (400 MHz, Chloroform-*d*)  $\delta$  7.22 (td,  $J = 7.8, 6.0$  Hz, 1H), 6.96 (dd,  $J = 7.6, 1.5$  Hz, 1H), 6.93 - 6.83 (m, 2H), 3.65 (t,  $J = 6.4$  Hz, 2H), 2.69 (dd,  $J = 8.8, 6.8$  Hz, 2H), 2.05 (s, 1H), 1.95 - 1.73 (m, 2H).  $^{13}\text{C NMR}$  (101 MHz, Chloroform-*d*)  $\delta$  163.0 (d,  $J = 245.2$  Hz), 144.5 (d,  $J = 7.2$  Hz), 129.8 (d,  $J = 8.4$  Hz), 124.1 (d,  $J = 2.6$  Hz), 115.2 (dt,  $J = 20.7, 1.6$  Hz), 112.7 (d,  $J = 21.1$  Hz), 61.9 (d,  $J = 2.3$  Hz), 33.9, 31.8.  $^{19}\text{F NMR}$  (376 MHz, Chloroform-*d*)  $\delta$  -113.81. **HRMS (ESI-TOF):** calcd.  $[\text{M}+\text{Na}]^+$  177.0692; found: 177.0684.

**Synthesis of 5g<sup>5</sup>:** To a solution of **5f** (0.2 mmol) in dry DCM (4 mL) at  $0^\circ\text{C}$  were added  $\text{PPh}_3$  (1.2 equiv.) and NBS (1.2 equiv.) sequentially. The mixture was stirred at room temperature for 30 min, concentrated *in vacuo*, and purified by flash column chromatography (silica gel, PE: EA = 5:1) to afford the primary bromide **5g**.  $^1\text{H NMR}$  (400 MHz, Chloroform-*d*)  $\delta$  7.24 (dddd,  $J = 9.0, 7.5, 6.0, 1.6$  Hz, 1H), 7.01 - 6.94 (m, 1H), 6.95 - 6.85 (m, 2H), 3.38 (td,  $J = 6.5, 1.6$  Hz, 2H), 2.88 - 2.66 (m, 2H), 2.21 - 2.06 (m, 2H).  $^{13}\text{C NMR}$  (101 MHz, Chloroform-*d*)  $\delta$  162.9 (d,  $J = 245.6$  Hz), 143.1 (d,  $J = 7.2$  Hz), 129.9 (d,  $J = 8.3$  Hz), 124.2 (d,  $J = 2.9$  Hz), 115.4 (d,  $J = 21.0$  Hz), 113.1 (d,  $J = 21.0$  Hz), 33.8, 33.7, 32.8.  $^{19}\text{F NMR}$  (376 MHz, Chloroform-*d*)  $\delta$  -113.49. **HRMS (ESI-TOF):** calcd.  $[\text{M}+\text{Na}]^+$  238.9848; found: 238.9853.

**Synthesis of 5h:** To a solution of **5f** (0.2 mmol) in dry DCM (4 mL) at  $0^\circ\text{C}$  were added  $\text{PPh}_3$  (1.2 equiv.) and NIS (1.2 equiv.) sequentially. The mixture was stirred at room temperature for 30 min, concentrated *in vacuo*, and purified by flash column chromatography (silica gel, PE: EA = 5:1) to afford the primary bromide **5h**.  $^1\text{H NMR}$  (400 MHz, Chloroform-*d*)  $\delta$  7.23 (dddd,  $J = 9.2, 7.7, 5.8, 1.7$  Hz, 1H), 6.96 (d,  $J = 7.6$  Hz, 1H), 6.89 (ddd,  $J = 8.2, 4.3, 2.1$  Hz, 2H), 3.14 (td,  $J = 6.9, 1.8$  Hz, 2H), 2.71 (td,  $J = 7.4, 1.7$  Hz, 2H), 2.10 (pd,  $J = 6.9, 1.8$  Hz, 2H).  $^{13}\text{C NMR}$  (101 MHz, Chloroform-*d*)  $\delta$  163.0 (d,  $J = 245.8$  Hz), 143.0 (d,  $J = 7.2$  Hz), 130.0 (d,  $J = 8.3$  Hz), 124.3 (d,  $J = 2.8$  Hz), 115.4 (d,  $J = 19.6$  Hz), 113.1 (d,  $J = 20.8$  Hz), 36.0, 34.6, 6.0.  $^{19}\text{F NMR}$  (376 MHz, Chloroform-*d*)  $\delta$  -113.32. **HRMS (ESI-TOF):** calcd.  $[\text{M}+\text{Na}]^+$  286.9709; found: 286.9716.

**Synthesis of 5i<sup>6</sup>:** Under a nitrogen atmosphere, a mixture of the amine (0.5 mmol), alcohol (1.0 mmol), and TFA (0.10 mmol) in NMP (1 mL) was treated with aqueous HI (55%, 0.05 mmol). The

resulting mixture was stirred at 150 °C for the indicated time. After cooling to room temperature, the reaction was quenched and neutralized with saturated aqueous NaHCO<sub>3</sub> (10 mL) and extracted with ethyl acetate (3 × 5 mL). The combined organic layers were washed with brine (3 × 20 mL), dried over anhydrous MgSO<sub>4</sub>, filtered, and concentrated under reduced pressure. Purification by silica gel column chromatography (silica gel, PE: EA = 7:1) afforded the corresponding product **5i**. **<sup>1</sup>H NMR** (400 MHz, Chloroform-*d*) δ 7.25 - 7.18 (m, 1H), 7.05 - 6.84 (m, 5H), 6.55 (t, *J* = 7.3 Hz, 1H), 6.49 (d, *J* = 8.2 Hz, 1H), 3.25 (q, *J* = 6.3, 5.0 Hz, 4H), 2.74 (t, *J* = 6.4 Hz, 2H), 2.66 (t, *J* = 7.8 Hz, 2H), 2.00 - 1.84 (m, 4H). **<sup>13</sup>C NMR** (101 MHz, Chloroform-*d*) δ 163.0 (d, *J* = 245.3 Hz), 145.2, 144.5 (d, *J* = 7.2 Hz), 129.8 (d, *J* = 8.3 Hz), 129.2, 127.1, 124.0, 122.4, 115.6, 115.2 (d, *J* = 20.9 Hz), 112.8 (d, *J* = 21.0 Hz), 110.5, 50.9, 49.5, 33.2, 28.2, 27.5, 22.3. **<sup>19</sup>F NMR** (376 MHz, Chloroform-*d*) δ -113.73. **HRMS (ESI-TOF)**: calcd. [M+Na]<sup>+</sup> 292.1477; found: 292.1485.

**Synthesis of 5j**<sup>7</sup>: To a solution of **5f** (0.5 mmol) in DMF (5 mL) was added NaH (60% w/w in mineral oil, 2.0 equiv.) at 0 °C. The mixture was stirred at this temperature for 2 h. Benzyl bromide (1.1 equiv.) was then added, and stirring was continued at room temperature for 9 h. The reaction mixture was concentrated *in vacuo*. The residue was partitioned between Et<sub>2</sub>O (10 mL) and water (10 mL). The organic layer was washed with water (10 mL) and brine (5 mL), dried over MgSO<sub>4</sub>, and concentrated. Purification by flash column chromatography (silica gel, PE: EA = 20:1) afforded **5j** (yield 85%) as a colorless oil. **<sup>1</sup>H NMR** (400 MHz, Chloroform-*d*) δ 7.33 (dd, *J* = 4.5, 1.8 Hz, 4H), 7.31 - 7.23 (m, 1H), 7.19 (dt, *J* = 10.0, 6.9 Hz, 1H), 6.93 (d, *J* = 7.7 Hz, 1H), 6.86 (d, *J* = 9.8 Hz, 2H), 4.49 (d, *J* = 1.8 Hz, 2H), 3.46 (td, *J* = 6.3, 1.8 Hz, 2H), 2.84 - 2.61 (m, 2H), 1.91 (qd, *J* = 8.2, 7.3, 5.3 Hz, 2H). **<sup>13</sup>C NMR** (101 MHz, Chloroform-*d*) δ 163.0 (d, *J* = 245.2 Hz), 144.7 (d, *J* = 7.2 Hz), 138.6, 129.7 (d, *J* = 8.3 Hz), 128.4, 127.7, 127.6, 124.2 (d, *J* = 2.6 Hz), 115.4 (d, *J* = 20.7 Hz), 112.7 (d, *J* = 21.0 Hz), 73.0, 69.3, 32.2, 31.2. **<sup>19</sup>F NMR** (376 MHz, Chloroform-*d*) δ -113.78. **HRMS (ESI-TOF)**: calcd. [M+Na]<sup>+</sup> 267.1161; found: 267.1154.

## 9. Characterisation of new compounds

### 9.1 Characterisation of the starting materials bearing different directing groups

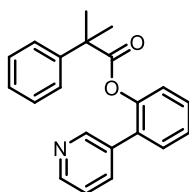

#### 2-(Pyridin-3-yl)phenyl 2-methyl-2-phenylpropanoate (DG-1).

Purification via column chromatography on silica gel (PE: EA = 7:1, v/v) afforded the desired product as white solid (0.50 g, 1.6 mmol, 80% yield);

**<sup>1</sup>H NMR** (600 MHz, Chloroform-*d*) δ 8.61 (d, *J* = 2.3 Hz, 1H), 8.56 (dd, *J* = 4.9, 1.7 Hz, 1H), 7.53 (dt, *J* = 7.8, 2.0 Hz, 1H), 7.39 - 7.35 (m, 1H), 7.34 - 7.29 (m, 3H), 7.29 - 7.23 (m, 4H), 7.19 - 7.14 (m, 1H), 7.06 (dd, *J* = 8.1, 1.2 Hz, 1H), 1.54 (s, 6H).

**<sup>13</sup>C NMR** (151 MHz, Chloroform-*d*) δ 174.8, 149.7, 148.5, 148.2, 143.5, 136.3, 133.0, 131.5, 130.7, 129.3, 128.6 (2C), 126.9, 126.4, 125.5 (2C), 122.9, 122.6, 46.6, 26.3 (2C).

**HRMS (ESI-TOF)**: calcd. [M+H]<sup>+</sup> 318.1489; found: 318.1489.

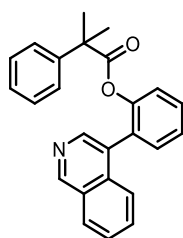

**2-(Isoquinolin-4-yl)phenyl 2-methyl-2-phenylpropanoate (DG-3).**

Purification via column chromatography on silica gel (PE: EA = 7:1, v/v) afforded the desired product as white solid (0.58 g, 1.6 mmol, 80% yield);

<sup>1</sup>H NMR (600 MHz, Chloroform-*d*)  $\delta$  8.92 (d, *J* = 2.3 Hz, 1H), 8.18 (d, *J* = 8.4 Hz, 1H), 8.05 (d, *J* = 2.2 Hz, 1H), 7.81 - 7.73 (m, 2H), 7.59 (ddd, *J* = 8.1, 6.8, 1.2 Hz, 1H), 7.49 - 7.40 (m, 2H), 7.35 (td, *J* = 7.5, 1.2 Hz, 1H), 7.21 - 7.16 (m, 2H), 7.13 (dd, *J* = 8.1, 1.3 Hz, 1H), 7.11 - 7.01 (m, 3H), 1.52 (s, 6H).

<sup>13</sup>C NMR (151 MHz, Chloroform-*d*)  $\delta$  175.0, 151.0, 148.4, 147.2, 143.3, 135.6, 131.6, 131.1, 130.4, 129.6, 129.3, 129.3, 128.3 (2C), 128.1, 127.5, 126.8, 126.8, 126.5, 125.3 (2C), 122.8, 46.6, 26.2 (2C).

HRMS (ESI-TOF): calcd. [M+H]<sup>+</sup> 368.1645; found: 368.1654.

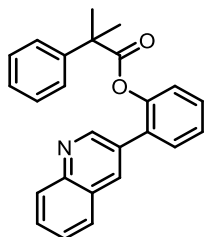

**2-(Quinolin-3-yl)phenyl 2-methyl-2-phenylpropanoate (DG-4).**

Purification via column chromatography on silica gel (PE: EA = 7:1, v/v) afforded the desired product as white solid (0.58 g, 1.6 mmol, 80% yield);

<sup>1</sup>H NMR (600 MHz, Chloroform-*d*)  $\delta$  8.92 (d, *J* = 2.3 Hz, 1H), 8.18 (dt, *J* = 8.3, 1.0 Hz, 1H), 8.04 (d, *J* = 2.3 Hz, 1H), 7.80 - 7.70 (m, 2H), 7.58 (ddd, *J* = 8.1, 6.8, 1.2 Hz, 1H), 7.46 - 7.40 (m, 2H), 7.35 (td, *J* = 7.5, 1.3 Hz, 1H), 7.20 - 7.16 (m, 2H), 7.15 - 7.11 (m, 1H), 7.11 - 7.07 (m, 2H), 7.07 - 7.03 (m, 1H), 1.52 (s, 6H).

<sup>13</sup>C NMR (151 MHz, Chloroform-*d*)  $\delta$  175.0, 151.0, 148.4, 147.2, 143.3, 135.6, 131.7, 131.1, 130.4, 129.6, 129.3, 129.3, 128.3 (2C), 128.1, 127.5, 126.8, 126.8, 126.5, 125.3 (2C), 122.8, 46.6, 26.2 (2C).

HRMS (ESI-TOF): calcd. [M+H]<sup>+</sup> 368.1645; found: 368.1654.

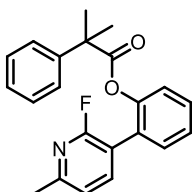

**2-(2-Fluoro-6-methylpyridin-3-yl)phenyl 2-methyl-2-phenylpropanoate (DG-7).**

Purification via column chromatography on silica gel (PE: EA = 7:1, v/v) afforded the desired

product as white solid (0.55 g, 1.6 mmol, 80% yield);

**<sup>1</sup>H NMR** (600 MHz, Chloroform-*d*)  $\delta$  8.20 (dd,  $J$  = 5.0, 1.9 Hz, 1H), 7.63 (ddd,  $J$  = 9.3, 7.3, 2.0 Hz, 1H), 7.30 (d,  $J$  = 4.4 Hz, 4H), 7.26 (dd,  $J$  = 8.3, 4.1 Hz, 2H), 7.21 (t,  $J$  = 7.5 Hz, 1H), 7.13 (td,  $J$  = 6.0, 5.1, 1.7 Hz, 2H), 1.99 (s, 3H), 1.52 (s, 6H).

**<sup>13</sup>C NMR** (151 MHz, Chloroform-*d*)  $\delta$  173.9, 160.4 (d,  $J$  = 240.1 Hz), 147.1, 147.0, 146.9, 142.9, 142.0 (d,  $J$  = 4.3 Hz), 131.7, 131.2, 128.5, 128.4 (2C), 126.9, 126.0, 125.8 (2C), 121.1 (d,  $J$  = 4.4 Hz), 120.2 (d,  $J$  = 31.6 Hz), 46.3, 26.0, 16.3 (2C).

**HRMS (ESI-TOF):** calcd.  $[M+Na]^+$  372.1370; found: 372.1374.

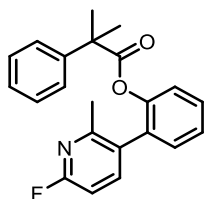

**2-(6-Fluoro-2-methylpyridin-3-yl)phenyl 2-methyl-2-phenylpropanoate (DG-8).**

Purification via column chromatography on silica gel (PE: EA = 7:1, v/v) afforded the desired product as white solid (0.55 g, 1.6 mmol, 80% yield);

**<sup>1</sup>H NMR** (600 MHz, Chloroform-*d*)  $\delta$  7.47 (dd,  $J$  = 9.6, 7.5 Hz, 1H), 7.41 (ddd,  $J$  = 8.6, 7.1, 2.1 Hz, 1H), 7.34 - 7.30 (m, 2H), 7.30 - 7.28 (m, 2H), 7.28 - 7.23 (m, 3H), 7.11 (dd,  $J$  = 8.1, 1.1 Hz, 1H), 6.96 - 6.92 (m, 1H), 2.55 (s, 3H), 1.57 (s, 6H).

**<sup>13</sup>C NMR** (151 MHz, Chloroform-*d*)  $\delta$  174.7, 159.5 (d,  $J$  = 239.1 Hz), 156.8 (d,  $J$  = 13.5 Hz), 148.5, 143.5, 142.0 (d,  $J$  = 4.2 Hz), 131.1, 129.5, 128.4 (2C), 127.3 (d,  $J$  = 4.3 Hz), 126.7, 126.0, 125.5 (2C), 122.4, 120.4 (d,  $J$  = 4.3 Hz), 116.1 (d,  $J$  = 31.4 Hz), 46.6, 26.2 (2C), 23.7.

**HRMS (ESI-TOF):** calcd.  $[M+Na]^+$  372.1370; found: 372.1374.

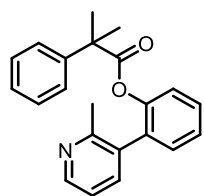

**2-(2-Methylpyridin-3-yl)phenyl 2-methyl-2-phenylpropanoate (DG-9).**

Purification via column chromatography on silica gel (PE: EA = 7:1, v/v) afforded the desired product as white solid (0.52 g, 1.6 mmol, 80% yield);

**<sup>1</sup>H NMR** (600 MHz, Chloroform-*d*)  $\delta$  8.51 (dt,  $J$  = 4.5, 2.1 Hz, 1H), 7.45 - 7.36 (m, 2H), 7.28 (tdd,  $J$  = 16.0, 7.9, 3.2 Hz, 2H), 7.23 - 7.19 (m, 3H), 7.16 - 7.09 (m, 3H), 7.06 (dd,  $J$  = 8.2, 3.6 Hz, 1H), 2.25 (s, 3H), 1.40 (d,  $J$  = 46.6 Hz, 6H).

**<sup>13</sup>C NMR** (151 MHz, Chloroform-*d*)  $\delta$  174.9, 156.8, 148.4, 148.2, 143.5, 137.5, 133.0, 132.2, 130.6, 129.1, 128.5 (2C), 126.8, 126.2, 125.4 (2C), 122.2, 120.5, 46.5, 26.1 (2C), 22.7.

**HRMS (ESI-TOF):** calcd.  $[M+H]^+$  332.1645; found: 332.1643.

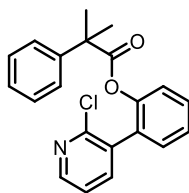

**2-(2-Chloropyridin-3-yl)phenyl 2-methyl-2-phenylpropanoate (DG-10).**

Purification via column chromatography on silica gel (PE: EA = 7:1, v/v) afforded the desired product as white solid (0.596 g, 1.7 mmol, 86% yield);

**<sup>1</sup>H NMR** (600 MHz, Chloroform-*d*)  $\delta$  8.38 (dd,  $J$  = 4.8, 1.9 Hz, 1H), 7.52 (dd,  $J$  = 7.5, 2.0 Hz, 1H), 7.46 (td,  $J$  = 7.8, 1.7 Hz, 1H), 7.33 (td,  $J$  = 7.5, 1.2 Hz, 1H), 7.30 - 7.26 (m, 3H), 7.26 - 7.21 (m, 3H), 7.18 (dd,  $J$  = 7.5, 4.8 Hz, 1H), 7.12 (dd,  $J$  = 8.2, 1.1 Hz, 1H), 1.47 (s, 6H).

**<sup>13</sup>C NMR** (151 MHz, Chloroform-*d*)  $\delta$  174.7, 150.6, 148.9, 148.2, 143.3, 140.0, 132.8, 130.7, 130.6, 129.8, 128.5 (2C), 126.8, 126.0, 125.4 (2C), 122.2, 121.9, 46.5 (2C), 26.0.

**HRMS (ESI-TOF):** calcd.  $[M+Na]^+$  374.0918; found: 374.0928.

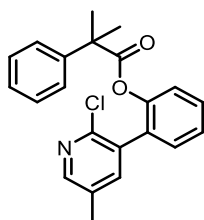

**2-(2-Chloro-5-methylpyridin-3-yl)phenyl 2-methyl-2-phenylpropanoate (DG-11).**

Purification via column chromatography on silica gel (PE: EA = 7:1, v/v) afforded the desired product as white solid (0.582 g, 1.6 mmol, 80% yield);

**<sup>1</sup>H NMR** (600 MHz, Chloroform-*d*)  $\delta$  8.20 (d,  $J$  = 2.4 Hz, 1H), 7.44 (td,  $J$  = 7.8, 1.8 Hz, 1H), 7.36 - 7.28 (m, 3H), 7.27 - 7.20 (m, 4H), 7.14 (dd,  $J$  = 8.2, 1.2 Hz, 1H), 6.95 - 6.86 (m, 1H), 2.28 (s, 3H), 1.51 (s, 6H).

**<sup>13</sup>C NMR** (151 MHz, Chloroform-*d*)  $\delta$  174.8, 149.0, 148.2, 147.6, 143.3, 140.8, 132.1, 131.9, 130.7, 129.8, 129.5, 128.5 (2C), 126.8, 126.0, 125.4 (2C), 122.3, 119.8, 115.6, 46.5, 17.5.

**HRMS (ESI-TOF):** calcd.  $[M+Na]^+$  388.1075; found: 388.1084.

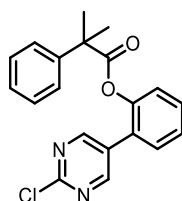

**2-(2-Chloropyrimidin-5-yl)phenyl 2-methyl-2-phenylpropanoate (DG-12).**

Purification via column chromatography on silica gel (PE: EA = 7:1, v/v) afforded the desired product as white solid (0.563 g, 1.6 mmol, 80% yield);

**<sup>1</sup>H NMR** (600 MHz, Chloroform-*d*)  $\delta$  8.46 (s, 2H), 7.49 (ddd,  $J$  = 8.2, 7.4, 1.7 Hz, 1H), 7.37 (td,  $J$  = 7.5, 1.2 Hz, 1H), 7.34 - 7.28 (m, 4H), 7.24 - 7.21 (m, 2H), 7.16 (dd,  $J$  = 8.2, 1.2 Hz, 1H), 1.63 (s, 6H).

**<sup>13</sup>C NMR** (151 MHz, Chloroform-*d*)  $\delta$  174.7, 160.1, 158.8 (2C), 148.1, 142.7, 130.5, 130.4, 129.5, 128.6 (2C), 127.3, 126.7, 126.5, 125.2 (2C), 123.1, 46.5, 26.1 (2C).

HRMS (ESI-TOF): calcd.  $[M+Na]^+$  375.0871; found: 375.0873.

## 9.2 Characterisation of products

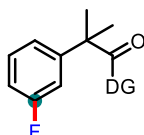

### 2-(2-Chloropyridin-3-yl)phenyl 2-(3-fluorophenyl)-2-methylpropanoate (2a).

Purification via TLC (PE: EA = 7:1, v/v) afforded the desired product as white solid (0.053 g, 0.144 mmol, 72% yield);

$^1\text{H NMR}$  (600 MHz, Chloroform-*d*)  $\delta$  8.38 (dd,  $J = 4.8, 1.9$  Hz, 1H), 7.51 (dd,  $J = 7.5, 2.0$  Hz, 1H), 7.47 (td,  $J = 7.8, 1.7$  Hz, 1H), 7.34 (t,  $J = 7.4$  Hz, 1H), 7.30 - 7.26 (m, 1H), 7.26 - 7.22 (m, 1H), 7.20 (dd,  $J = 7.5, 4.8$  Hz, 1H), 7.13 (d,  $J = 8.2$  Hz, 1H), 6.99 (dd,  $J = 7.9, 1.8$  Hz, 1H), 6.94 (td,  $J = 8.3, 2.6$  Hz, 1H), 6.90 (dt,  $J = 10.6, 2.2$  Hz, 1H), 1.47 (s, 6H).

$^{13}\text{C NMR}$  (151 MHz, Chloroform-*d*)  $\delta$  174.1, 162.7 (d,  $J = 245.8$  Hz), 150.6, 148.9, 148.1, 145.9 (d,  $J = 6.8$  Hz), 139.9, 132.7, 130.6, 129.9 (d,  $J = 8.2$  Hz), 129.9, 128.5, 126.1, 122.1, 121.9, 121.2 (d,  $J = 2.8$  Hz), 113.8 (d,  $J = 21.0$  Hz), 112.8 (d,  $J = 22.5$  Hz), 46.4 (d,  $J = 16.6$  Hz), 26.0 (2C).

$^{19}\text{F NMR}$  (565 MHz, Chloroform-*d*)  $\delta$  -112.35.

HRMS (ESI-TOF): calcd.  $[M+Na]^+$  392.0824; found: 392.0831.

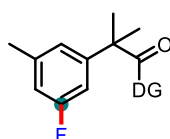

### 2-(2-Chloropyridin-3-yl)phenyl 2-(3-fluoro-5-methylphenyl)-2-methylpropanoate (2b).

Purification via TLC (PE: EA = 7:1, v/v) afforded the desired product as white solid (0.050 g, 0.13 mmol, 65% yield);

$^1\text{H NMR}$  (600 MHz, Chloroform-*d*)  $\delta$  8.37 (dd,  $J = 4.8, 1.9$  Hz, 1H), 7.51 (dd,  $J = 7.5, 1.9$  Hz, 1H), 7.46 (qd,  $J = 7.6, 1.8$  Hz, 1H), 7.37 - 7.31 (m, 1H), 7.28 - 6.96 (m, 4H), 6.84 - 6.67 (m, 2H), 2.35 (s, 3H), 1.45 (s, 6H).

$^{13}\text{C NMR}$  (151 MHz, Chloroform-*d*)  $\delta$  174.1, 162.7 (d,  $J = 244.7$  Hz), 150.6, 148.9, 148.1, 140.3 (d,  $J = 8.5$  Hz), 139.9, 132.6, 130.6, 129.8, 128.3, 126.1, 122.4 (d,  $J = 42.6$  Hz), 122.2, 122.0 (d,  $J = 2.6$  Hz), 121.8, 114.5 (d,  $J = 21.0$  Hz), 109.8 (d,  $J = 22.7$  Hz), 46.3 (d,  $J = 11.8$  Hz), 25.9, 21.6, 21.5 (d,  $J = 1.8$  Hz).

$^{19}\text{F NMR}$  (565 MHz, Chloroform-*d*)  $\delta$  -113.67.

HRMS (ESI-TOF): calcd.  $[M+Na]^+$  406.0981; found: 406.0986.

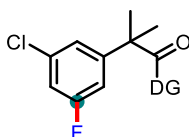

### 2-(2-Chloropyridin-3-yl)phenyl 2-(3-chloro-5-fluorophenyl)-2-methylpropanoate (2c).

Purification via TLC (PE: EA = 7:1, v/v) afforded the desired product as white solid (0.028 g, 0.07

mmol, 35% yield);

**<sup>1</sup>H NMR** (600 MHz, Chloroform-*d*)  $\delta$  8.39 (dd,  $J = 4.8, 2.0$  Hz, 1H), 7.56 - 7.44 (m, 2H), 7.35 (td,  $J = 7.5, 1.1$  Hz, 1H), 7.27 (d,  $J = 1.7$  Hz, 1H), 7.22 (dd,  $J = 7.5, 4.8$  Hz, 1H), 7.15 (d,  $J = 8.2$  Hz, 1H), 7.02 - 6.93 (m, 2H), 6.81 (dt,  $J = 9.9, 2.0$  Hz, 1H), 1.47 (s, 6H).

**<sup>13</sup>C NMR** (151 MHz, Chloroform-*d*)  $\delta$  173.4, 162.5 (d,  $J = 249.3$  Hz), 150.6, 149.0, 147.9, 147.0, 139.8, 135.0 (d,  $J = 10.9$  Hz), 132.5, 130.7, 130.6, 129.9, 126.3, 122.0, 122.0 (d,  $J = 3.1$  Hz), 121.8, 114.9 (d,  $J = 24.7$  Hz), 111.6 (d,  $J = 22.5$  Hz), 46.4, 25.8 (2C).

**<sup>19</sup>F NMR** (565 MHz, Chloroform-*d*)  $\delta$  -110.08.

**HRMS (ESI-TOF):** calcd.  $[M+Na]^+$  426.0434; found: 426.0438.

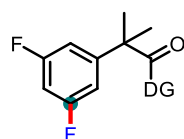

### 2-(2-Chloropyridin-3-yl)phenyl 2-(3,5-difluorophenyl)-2-methylpropanoate (2d).

Purification via TLC (PE: EA = 7:1, v/v) afforded the desired product as colorless oil (0.023 g, 0.062 mmol, 31% yield);

**<sup>1</sup>H NMR** (600 MHz, Chloroform-*d*)  $\delta$  8.39 (dd,  $J = 4.8, 2.0$  Hz, 1H), 7.52 (dd,  $J = 7.5, 2.0$  Hz, 1H), 7.48 (td,  $J = 7.8, 1.7$  Hz, 1H), 7.35 (td,  $J = 7.5, 1.1$  Hz, 1H), 7.30 - 7.25 (m, 2H), 7.23 (dd,  $J = 7.5, 4.8$  Hz, 1H), 7.14 (d,  $J = 8.2$  Hz, 1H), 6.77 - 6.65 (m, 3H), 1.47 (s, 7H).

**<sup>13</sup>C NMR** (151 MHz, Chloroform-*d*)  $\delta$  173.5, 163.7 (d,  $J = 13.2$  Hz), 162.1 (d,  $J = 13.1$  Hz), 150.6, 149.0, 148.0, 147.2 (d,  $J = 8.4$  Hz), 139.8, 132.6, 130.7, 130.6, 129.9, 126.3, 122.0, 121.8, 109.0 (d,  $J = 5.2$  Hz), 108.8 (d,  $J = 5.5$  Hz), 102.5 (t,  $J = 25.2$  Hz), 46.4, 25.8 (2C).

**<sup>19</sup>F NMR** (565 MHz, Chloroform-*d*)  $\delta$  -109.00.

**HRMS (ESI-TOF):** calcd.  $[M+Na]^+$  410.0730; found: 410.0736.

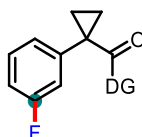

### 2-(2-Chloropyridin-3-yl)phenyl 1-(3-fluorophenyl)cyclopropane-1-carboxylate (2e).

Purification via TLC (PE: EA = 7:1, v/v) afforded the desired product as white solid (0.055 g, 0.15 mmol, 75% yield);

**<sup>1</sup>H NMR** (600 MHz, Chloroform-*d*)  $\delta$  8.50 (dd,  $J = 4.8, 2.0$  Hz, 1H), 7.51 (dd,  $J = 7.5, 2.0$  Hz, 1H), 7.46 (ddd,  $J = 8.2, 7.4, 1.8$  Hz, 1H), 7.35 - 7.30 (m, 2H), 7.27 (dd,  $J = 7.5, 1.7$  Hz, 1H), 7.24 (dd,  $J = 8.3, 1.2$  Hz, 1H), 7.20 (td,  $J = 8.0, 6.0$  Hz, 1H), 6.96 - 6.88 (m, 2H), 6.83 (ddd,  $J = 9.7, 2.6, 1.6$  Hz, 1H), 1.53 (q,  $J = 3.8$  Hz, 2H), 1.18 (q,  $J = 3.8$  Hz, 2H).

**<sup>13</sup>C NMR** (151 MHz, Chloroform-*d*)  $\delta$  171.9, 162.3 (d,  $J = 245.9$  Hz), 150.8, 148.9, 148.1, 140.8 (d,  $J = 7.8$  Hz), 140.1, 132.9, 130.5, 130.3, 129.7, 129.6 (d,  $J = 8.4$  Hz), 126.1 (d,  $J = 2.9$  Hz), 126.0, 122.4, 122.0, 117.4 (d,  $J = 21.5$  Hz), 114.3 (d,  $J = 21.0$  Hz), 28.8 (d,  $J = 2.0$  Hz), 17.1(2C).

**<sup>19</sup>F NMR** (565 MHz, Chloroform-*d*)  $\delta$  -113.33.

**HRMS (ESI-TOF):** calcd.  $[M+Na]^+$  390.0668; found: 390.0672.

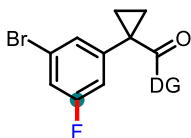

**2-(2-Chloropyridin-3-yl)phenyl 1-(3-bromo-5-fluorophenyl)cyclopropane-1-carboxylate (2f).**

Purification via TLC (PE: EA = 7:1, v/v) afforded the desired product as white solid (0.026 g, 0.058 mmol, 29% yield);

<sup>1</sup>H NMR (400 MHz, Chloroform-*d*)  $\delta$  8.48 (dd,  $J = 4.8, 2.0$  Hz, 1H), 7.53 - 7.41 (m, 2H), 7.36 - 7.27 (m, 2H), 7.27 - 7.19 (m, 2H), 7.14 - 7.09 (m, 1H), 7.07 (d,  $J = 2.3$  Hz, 1H), 6.77 (dt,  $J = 9.2, 1.9$  Hz, 1H), 1.52 (q,  $J = 4.2$  Hz, 2H), 1.15 (q,  $J = 4.2$  Hz, 2H).

<sup>13</sup>C NMR (101 MHz, Chloroform-*d*)  $\delta$  171.24, 162.10 (d,  $J = 250.9$  Hz), 150.72, 149.15, 148.01, 142.33 (d,  $J = 8.3$  Hz), 140.08, 132.79, 130.57, 130.25, 129.82, 129.42, 126.13, 122.40, 122.06, 118.45 (d,  $J = 2.2$  Hz), 118.21, 116.79 (d,  $J = 2.7$  Hz), 116.58 (d,  $J = 2.8$  Hz), 28.72, 28.70, 17.20.

<sup>19</sup>F NMR (376 MHz, Chloroform-*d*)  $\delta$  -110.77.

HRMS (ESI-TOF): calcd.  $[M+Na]^+$  467.9778; found: 467.9783.

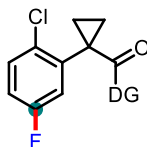

**2-(2-Chloropyridin-3-yl)phenyl 1-(2-chloro-5-fluorophenyl)cyclopropane-1-carboxylate (2g).**

Purification via TLC (PE: EA = 7:1, v/v) afforded the desired product as white solid (0.030 g, 0.074 mmol, 37% yield);

<sup>1</sup>H NMR (400 MHz, Chloroform-*d*)  $\delta$  8.46 (dd,  $J = 4.8, 2.0$  Hz, 1H), 7.51 (dd,  $J = 7.5, 2.0$  Hz, 1H), 7.46 (td,  $J = 7.7, 1.8$  Hz, 1H), 7.34 - 7.26 (m, 4H), 7.26 - 7.24 (m, 1H), 6.94 (ddd,  $J = 8.8, 7.8, 3.0$  Hz, 1H), 6.86 (dd,  $J = 8.9, 3.0$  Hz, 1H), 1.67 (q,  $J = 3.6$  Hz, 2H), 1.20 (q,  $J = 3.6$  Hz, 2H).

<sup>13</sup>C NMR (101 MHz, Chloroform-*d*)  $\delta$  170.9, 160.9 (d,  $J = 246.7$  Hz), 150.7, 148.9, 148.0, 140.1, 138.4 (d,  $J = 7.8$  Hz), 132.9, 131.6 (d,  $J = 3.3$  Hz), 130.6, 130.5 (d,  $J = 5.0$  Hz), 130.4 (d,  $J = 15.2$  Hz), 129.8, 126.0, 122.3, 122.0, 118.6 (d,  $J = 23.2$  Hz), 115.8 (d,  $J = 22.7$  Hz), 28.1 (d,  $J = 1.6$  Hz), 18.2 (2C).

<sup>19</sup>F NMR (376 MHz, Chloroform-*d*)  $\delta$  -115.21.

HRMS (ESI-TOF): calcd.  $[M+Na]^+$  424.0283; found: 424.0291.

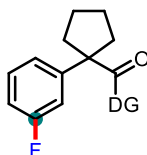

**2-(2-Chloropyridin-3-yl)phenyl 1-(3-fluorophenyl)cyclopentane-1-carboxylate (2h).**

Purification via TLC (PE: EA = 7:1, v/v) afforded the desired product as white solid (0.065 g, 0.166 mmol, 83% yield);

<sup>1</sup>H NMR (400 MHz, Chloroform-*d*)  $\delta$  8.35 (dd,  $J = 4.9, 2.0$  Hz, 1H), 7.47 - 7.39 (m, 2H), 7.32 (td,  $J = 7.5, 1.2$  Hz, 1H), 7.27 - 7.18 (m, 2H), 7.14 (dd,  $J = 7.5, 4.8$  Hz, 1H), 7.02 (ddd,  $J = 8.1, 3.2, 1.3$  Hz, 2H), 6.99 - 6.83 (m, 2H), 2.56 (s, 2H), 1.84 (dt,  $J = 12.8, 8.6$  Hz, 2H), 1.73 - 1.60 (m, 2H), 1.52 (s, 2H).

$^{13}\text{C}$  NMR (101 MHz, Chloroform-*d*)  $\delta$  173.4, 162.5 (d,  $J = 245.7$  Hz), 150.5, 148.9, 148.1, 144.5 (d,  $J = 7.1$  Hz), 139.7, 132.6, 130.7 (d,  $J = 7.3$  Hz), 130.6, 129.9, 129.8 (d,  $J = 8.2$  Hz), 126.1, 122.5 (d,  $J = 2.9$  Hz), 122.3, 121.8, 114.0 (d,  $J = 9.0$  Hz), 113.8 (d,  $J = 8.0$  Hz), 58.9 (d,  $J = 1.8$  Hz), 35.8 (2C), 23.2 (2C).

$^{19}\text{F}$  NMR (376 MHz, Chloroform-*d*)  $\delta$  -112.71.

HRMS (ESI-TOF): calcd.  $[\text{M}+\text{Na}]^+$  418.0986; found: 418.0992.

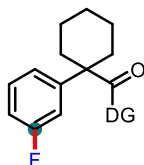

**2-(2-Chloropyridin-3-yl)phenyl 1-(3-fluorophenyl)cyclohexane-1-carboxylate (2i).**

Purification via TLC (PE: EA = 7:1, v/v) afforded the desired product as white solid (0.071 g, 0.174 mmol, 87% yield);

$^1\text{H}$  NMR (400 MHz, Chloroform-*d*)  $\delta$  8.32 (dd,  $J = 4.8, 2.0$  Hz, 1H), 7.45 (ddd,  $J = 10.2, 7.8, 1.9$  Hz, 2H), 7.32 (td,  $J = 7.5, 1.2$  Hz, 1H), 7.24 (dtd,  $J = 8.1, 6.7, 1.7$  Hz, 2H), 7.12 (dd,  $J = 7.5, 4.8$  Hz, 1H), 7.09 - 7.03 (m, 2H), 6.98 - 6.88 (m, 2H), 2.56 - 2.31 (m, 2H), 1.77 - 1.48 (m, 4H), 1.46 - 0.99 (m, 4H).

$^{13}\text{C}$  NMR (101 MHz, Chloroform-*d*)  $\delta$  172.8, 162.8 (d,  $J = 245.4$  Hz), 150.5, 148.9, 148.1, 145.1 (d,  $J = 7.0$  Hz), 139.8, 132.6, 130.7 (d,  $J = 2.3$  Hz), 130.7, 129.9 (d,  $J = 8.3$  Hz), 129.8, 126.0, 122.2, 121.8, 121.5 (d,  $J = 2.8$  Hz), 113.9 (d,  $J = 21.1$  Hz), 113.1 (d,  $J = 22.5$  Hz), 50.5 (d,  $J = 1.7$  Hz), 34.3 (2C), 25.3, 23.3 (2C).

$^{19}\text{F}$  NMR (376 MHz, Chloroform-*d*)  $\delta$  -112.27.

HRMS (ESI-TOF): calcd.  $[\text{M}+\text{Na}]^+$  432.1143; found: 432.1139.

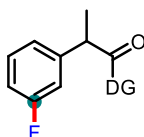

**2-(2-Chloropyridin-3-yl)phenyl 2-(3-fluorophenyl)propanoate (2j).**

Purification via TLC (PE: EA = 7:1, v/v) afforded the desired product as colorless oil (0.051 g, 0.144 mmol, 68% yield);

$^1\text{H}$  NMR (600 MHz, Chloroform-*d*)  $\delta$  8.32 (s, 1H), 7.47 (qd,  $J = 7.8, 1.8$  Hz, 2H), 7.35 (td,  $J = 7.5, 1.1$  Hz, 1H), 7.28 - 7.16 (m, 3H), 7.13 (dd,  $J = 7.6, 4.9$  Hz, 1H), 7.10 - 6.89 (m, 2H), 6.81 (s, 1H), 3.76 (q,  $J = 5.2, 3.3$  Hz, 1H), 1.40 (d,  $J = 6.8$  Hz, 3H).

$^{13}\text{C}$  NMR (151 MHz, Chloroform-*d*)  $\delta$  171.8, 162.7 (d,  $J = 246.1$  Hz), 150.4, 148.9, 147.8, 141.4 (d,  $J = 7.5$  Hz), 139.8, 132.4, 130.7 (d,  $J = 17.7$  Hz), 130.1 (d,  $J = 8.3$  Hz), 129.9, 128.7, 127.2 (d,  $J = 11.6$  Hz), 126.2, 123.2, 122.4, 121.8, 114.3 (d,  $J = 21.1$  Hz), 45.0, 17.9.

$^{19}\text{F}$  NMR (565 MHz, Chloroform-*d*)  $\delta$  -112.41.

HRMS (ESI-TOF): calcd.  $[\text{M}+\text{Na}]^+$  378.0668; found: 378.0675.

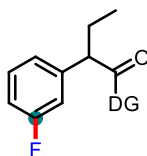

**2-(2-Chloropyridin-3-yl)phenyl 2-(3-fluorophenyl)butanoate (2k).**

Purification via TLC (PE: EA = 7:1, v/v) afforded the desired product as colorless oil (0.050 g, 0.136mmol, 68% yield);

<sup>1</sup>H NMR (600 MHz, Chloroform-*d*)  $\delta$  8.29 (s, 1H), 7.47 (tt,  $J$  = 8.7, 4.3 Hz, 1H), 7.35 (td,  $J$  = 7.6, 1.2 Hz, 1H), 7.27 - 7.19 (m, 2H), 7.12 (d,  $J$  = 34.0 Hz, 2H), 6.95 (ddd,  $J$  = 21.6, 10.8, 5.1 Hz, 2H), 6.82 (s, 1H), 3.62 - 3.22 (m, 1H), 2.11 - 1.63 (m, 3H), 1.40 - 1.17 (m, 2H).

<sup>13</sup>C NMR (151 MHz, Chloroform-*d*)  $\delta$  171.7, 162.8 (d,  $J$  = 246.4 Hz), 148.9, 147.8, 140.2, 139.8, 132.5, 130.7 (d,  $J$  = 6.6 Hz), 130.1 (d,  $J$  = 8.3 Hz), 129.9, 128.6, 127.7, 127.2, 126.2, 126.1, 122.4, 121.8, 114.3 (d,  $J$  = 21.1 Hz), 52.9, 26.1, 11.8.

<sup>19</sup>F NMR (565 MHz, Chloroform-*d*)  $\delta$  -112.53.

HRMS (ESI-TOF): calcd. [M+Na]<sup>+</sup> 392.0824; found: 392.0824.

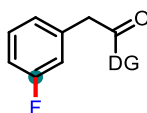

**2-(2-Chloropyridin-3-yl)phenyl 2-(3-fluorophenyl)acetate (2l).**

Purification via TLC (PE: EA = 7:1, v/v) afforded the desired product as colorless oil (0.035 g, 0.104 mmol, 52% yield);

<sup>1</sup>H NMR (600 MHz, Chloroform-*d*)  $\delta$  8.35 (dd,  $J$  = 4.8, 2.0 Hz, 1H), 7.49 (dtd,  $J$  = 8.0, 3.9, 1.6 Hz, 2H), 7.36 (td,  $J$  = 7.5, 1.2 Hz, 1H), 7.31 - 7.28 (m, 1H), 7.27 - 7.18 (m, 2H), 7.15 (dd,  $J$  = 7.5, 4.8 Hz, 1H), 6.97 (td,  $J$  = 8.5, 2.6 Hz, 1H), 6.88 (d,  $J$  = 7.6 Hz, 1H), 6.78 (dt,  $J$  = 9.6, 2.1 Hz, 1H), 3.62 (s, 2H).

<sup>13</sup>C NMR (151 MHz, Chloroform-*d*)  $\delta$  168.8, 162.7 (d,  $J$  = 246.4 Hz), 150.4, 149.0, 147.8, 139.8, 134.9 (d,  $J$  = 7.7 Hz), 132.5, 130.8, 130.6, 130.1 (d,  $J$  = 8.3 Hz), 129.9, 126.3, 124.8 (d,  $J$  = 2.9 Hz), 122.4, 121.9, 116.0 (d,  $J$  = 22.0 Hz), 114.3 (d,  $J$  = 21.1 Hz), 40.8 (d,  $J$  = 1.9 Hz).

<sup>19</sup>F NMR (565 MHz, Chloroform-*d*)  $\delta$  -112.72.

HRMS (ESI-TOF): calcd. [M+Na]<sup>+</sup> 364.0511; found: 364.0515.

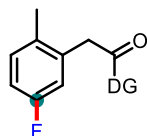

**2-(2-Chloropyridin-3-yl)phenyl 2-(5-fluoro-2-methylphenyl)acetate (2m).**

Purification via TLC (PE: EA = 7:1, v/v) afforded the desired product as colorless oil (0.048 g, 0.138 mmol, 69% yield);

<sup>1</sup>H NMR (600 MHz, Chloroform-*d*)  $\delta$  8.36 (dd,  $J$  = 4.8, 2.0 Hz, 1H), 7.49 (dq,  $J$  = 6.2, 1.9 Hz, 2H), 7.36 (td,  $J$  = 7.5, 1.2 Hz, 1H), 7.30 - 7.27 (m, 1H), 7.25 (dd,  $J$  = 8.2, 1.2 Hz, 1H), 7.16 (dd,  $J$  = 7.5, 4.8 Hz, 1H), 7.07 (dd,  $J$  = 8.4, 5.8 Hz, 1H), 6.87 (td,  $J$  = 8.4, 2.8 Hz, 1H), 6.72 (dd,  $J$  = 9.3, 2.7 Hz, 1H), 3.62 (s, 2H), 2.12 (s, 3H).

<sup>13</sup>C NMR (151 MHz, Chloroform-*d*)  $\delta$  168.7, 161.0 (d,  $J$  = 243.7 Hz), 150.4, 149.0, 147.8, 139.8,

133.1 (d,  $J = 7.3$  Hz), 132.5, 132.2 (d,  $J = 3.6$  Hz), 131.6 (d,  $J = 7.8$  Hz), 130.8, 130.6, 129.9, 126.3, 122.4, 121.9, 116.6 (d,  $J = 21.7$  Hz), 114.3 (d,  $J = 20.5$  Hz), 38.8 (d,  $J = 1.4$  Hz), 18.6.

$^{19}\text{F}$  NMR (565 MHz, Chloroform- $d$ )  $\delta$  -117.42.

HRMS (ESI-TOF): calcd.  $[\text{M}+\text{Na}]^+$  378.0668; found: 378.0672.

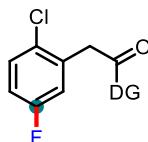

### 2-(2-Chloropyridin-3-yl)phenyl 2-(2-chloro-5-fluorophenyl)acetate (2n).

Purification via TLC (PE: EA = 7:1, v/v) afforded the desired product as white solid (0.021 g, 0.056 mmol, 28% yield);

$^1\text{H}$  NMR (600 MHz, Chloroform- $d$ )  $\delta$  8.37 (d,  $J = 5.9$  Hz, 1H), 7.50 (d,  $J = 6.5$  Hz, 2H), 7.41 - 7.30 (m, 2H), 7.22 (ddt,  $J = 34.2, 7.7, 3.6$  Hz, 2H), 7.01 (t,  $J = 6.1$  Hz, 1H), 6.88 (s, 1H), 6.76 - 6.62 (m, 1H), 3.59 (t,  $J = 3.7$  Hz, 2H).

$^{13}\text{C}$  NMR (151 MHz, Chloroform- $d$ )  $\delta$  168.1, 162.5 (d,  $J = 249.9$  Hz), 150.4, 149.1, 147.7, 139.8, 136.0 (d,  $J = 9.2$  Hz), 135.1 (d,  $J = 10.4$  Hz), 132.4, 130.8, 130.5, 130.0, 126.5, 125.2 (d,  $J = 3.3$  Hz), 122.3, 121.9, 115.4 (d,  $J = 24.7$  Hz), 114.8 (d,  $J = 21.9$  Hz), 40.5.

$^{19}\text{F}$  NMR (565 MHz, Chloroform- $d$ )  $\delta$  -110.41.

HRMS (ESI-TOF): calcd.  $[\text{M}+\text{Na}]^+$  398.0121; found: 398.0126.

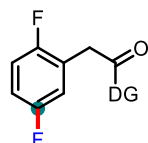

### 2-(2-Chloropyridin-3-yl)phenyl 2-(2,5-difluorophenyl)acetate (2o).

Purification via TLC (PE: EA = 7:1, v/v) afforded the desired product as colorless oil (0.024 g, 0.068 mmol, 34% yield);

$^1\text{H}$  NMR (400 MHz, Chloroform- $d$ )  $\delta$  8.41 (dd,  $J = 4.8, 2.0$  Hz, 1H), 7.55 (dd,  $J = 7.5, 2.0$  Hz, 1H), 7.50 (td,  $J = 7.8, 1.8$  Hz, 1H), 7.37 (td,  $J = 7.5, 1.2$  Hz, 1H), 7.32 - 7.28 (m, 1H), 7.27 - 7.22 (m, 2H), 7.03 - 6.90 (m, 2H), 6.76 (ddd,  $J = 8.6, 5.7, 2.9$  Hz, 1H), 3.66 (d,  $J = 1.4$  Hz, 2H).

$^{13}\text{C}$  NMR (101 MHz, Chloroform- $d$ )  $\delta$  167.99, 158.36 (dd,  $J = 242.8, 2.3$  Hz), 156.85 (dd,  $J = 243.0, 2.6$  Hz), 150.49, 149.05, 147.83, 140.00, 132.59, 130.86, 130.54, 130.01, 126.42, 122.47, 122.06, 121.69 (dd,  $J = 18.7, 8.4$  Hz), 117.58 (dd,  $J = 24.5, 4.0$  Hz), 116.45 (dd,  $J = 24.8, 8.8$  Hz), 115.76 (dd,  $J = 23.9, 8.4$  Hz), 34.28 (dd,  $J = 2.8, 1.1$  Hz).

$^{19}\text{F}$  NMR (376 MHz, Chloroform- $d$ )  $\delta$  -118.64 (d,  $J = 17.5$  Hz), -123.18 (d,  $J = 17.3$  Hz).

HRMS (ESI-TOF): calcd.  $[\text{M}+\text{Na}]^+$  382.0422; found: 382.0431.

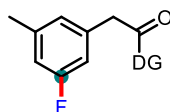

### 2-(2-Chloropyridin-3-yl)phenyl 2-(3-fluoro-5-methylphenyl)acetate (2p).

Purification via TLC (PE: EA = 7:1, v/v) afforded the desired product as colorless oil (0.044 g, 0.126 mmol, 63% yield);

**<sup>1</sup>H NMR** (600 MHz, Chloroform-*d*)  $\delta$  8.36 (dd,  $J = 4.8, 2.0$  Hz, 1H), 7.49 (ddd,  $J = 7.8, 4.9, 1.9$  Hz, 2H), 7.36 (td,  $J = 7.6, 1.2$  Hz, 1H), 7.31 – 7.26 (m, 1H), 7.25 (dd,  $J = 8.2, 1.1$  Hz, 1H), 7.16 (dd,  $J = 7.5, 4.8$  Hz, 1H), 7.07 (dd,  $J = 8.4, 5.9$  Hz, 1H), 6.88 (td,  $J = 8.4, 2.8$  Hz, 1H), 6.72 (dd,  $J = 9.3, 2.7$  Hz, 1H), 3.62 (s, 2H), 2.12 (s, 3H).

**<sup>13</sup>C NMR** (151 MHz, Chloroform-*d*)  $\delta$  168.7, 161.0 (d,  $J = 243.9$  Hz), 150.4, 149.0, 147.8, 139.8, 133.1 (d,  $J = 7.6$  Hz), 132.5, 132.2 (d,  $J = 3.3$  Hz), 131.6 (d,  $J = 8.1$  Hz), 130.8, 130.64 129.9, 126.3, 122.4, 121.9, 116.6 (d,  $J = 21.7$  Hz), 114.3 (d,  $J = 20.6$  Hz), 38.8, 18.6.

**<sup>19</sup>F NMR** (565 MHz, Chloroform-*d*)  $\delta$  -117.43.

**HRMS (ESI-TOF)**: calcd.  $[M+Na]^+$  378.0668; found: 378.0671.

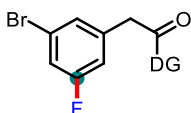

### 2-(2-Chloropyridin-3-yl) phenyl 2-(3-bromo-5-fluorophenyl) acetate (2q).

Purification via TLC (PE: EA = 7:1, v/v) afforded the desired product as white solid (0.022 g, 0.052 mmol, 26% yield);

**<sup>1</sup>H NMR** (400 MHz, Chloroform-*d*)  $\delta$  8.39 (dd,  $J = 4.8, 2.0$  Hz, 1H), 7.53 – 7.45 (m, 2H), 7.38 (td,  $J = 7.5, 1.2$  Hz, 1H), 7.30 (d,  $J = 9.8$  Hz, 1H), 7.24 (dd,  $J = 8.2, 1.2$  Hz, 1H), 7.22 - 7.13 (m, 2H), 7.04 (d,  $J = 1.8$  Hz, 1H), 6.75 (dt,  $J = 9.0, 1.9$  Hz, 1H), 3.59 (s, 2H).

**<sup>13</sup>C NMR** (101 MHz, Chloroform-*d*)  $\delta$  168.21, 162.46 (d,  $J = 251.1$  Hz), 150.43, 149.16, 147.73, 139.89, 136.32 (d,  $J = 8.4$  Hz), 132.42, 130.88, 130.58, 130.06, 128.17 (d,  $J = 3.3$  Hz), 126.53, 122.66 (d,  $J = 10.2$  Hz), 122.38, 121.95, 118.29 (d,  $J = 24.3$  Hz), 115.30 (d,  $J = 21.8$  Hz), 40.50 (d,  $J = 1.8$  Hz).

**<sup>19</sup>F NMR** (376 MHz, Chloroform-*d*)  $\delta$  -110.16.

**HRMS (ESI-TOF)**: calcd.  $[M+Na]^+$  441.9622; found: 441.9631.

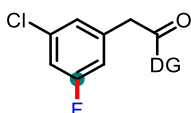

### 2-(2-Chloropyridin-3-yl) phenyl 2-(3-chloro-5-fluorophenyl) acetate (2r).

Purification via TLC (PE: EA = 7:1, v/v) afforded the desired product as white solid (0.021g, 0.056 mmol, 29% yield);

**<sup>1</sup>H NMR** (600 MHz, Chloroform-*d*)  $\delta$  8.41 (dd,  $J = 4.8, 2.0$  Hz, 1H), 7.56 (dd,  $J = 7.5, 2.0$  Hz, 1H), 7.50 (td,  $J = 7.8, 1.7$  Hz, 1H), 7.37 (td,  $J = 7.5, 1.2$  Hz, 1H), 7.32 - 7.28 (m, 3H), 7.25 (dd,  $J = 7.5, 4.8$  Hz, 1H), 6.96 (td,  $J = 8.3, 3.0$  Hz, 1H), 6.84 (dd,  $J = 8.7, 3.0$  Hz, 1H), 3.77 (s, 2H).

**<sup>13</sup>C NMR** (151 MHz, Chloroform-*d*)  $\delta$  167.7, 161.0 (d,  $J = 247.0$  Hz), 150.5, 149.0, 147.8, 140.0, 133.0 (d,  $J = 8.3$  Hz), 132.7, 130.8, 130.6 (d,  $J = 8.5$  Hz), 130.5, 129.9, 129.4 (d,  $J = 3.3$  Hz), 126.3, 122.4, 122.0, 118.2 (d,  $J = 23.5$  Hz), 116.0 (d,  $J = 22.6$  Hz), 38.9.

**<sup>19</sup>F NMR** (565 MHz, Chloroform-*d*)  $\delta$  -114.91.

**HRMS (ESI-TOF)**: calcd.  $[M+Na]^+$  398.0121; found: 398.0128.

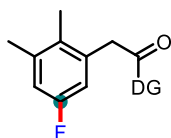

**2-(2-Chloropyridin-3-yl) phenyl 2-(5-fluoro-2,3-dimethylphenyl) acetate (2s).**

Purification via TLC (PE: EA = 7:1, v/v) afforded the desired product as white solid (0.037g, 0.102 mmol, 51% yield);

<sup>1</sup>H NMR (400 MHz, Chloroform-*d*)  $\delta$  8.35 (dd,  $J = 4.8, 2.0$  Hz, 1H), 7.63 - 7.42 (m, 2H), 7.36 (td,  $J = 7.5, 1.2$  Hz, 1H), 7.32 - 7.22 (m, 2H), 7.14 (dd,  $J = 7.6, 4.8$  Hz, 1H), 6.80 (dd,  $J = 9.4, 2.8$  Hz, 1H), 6.60 (dd,  $J = 9.2, 2.8$  Hz, 1H), 3.64 (s, 2H), 2.26 (s, 3H), 1.97 (s, 3H).

<sup>13</sup>C NMR (101 MHz, Chloroform-*d*)  $\delta$  168.9, 160.3 (d,  $J = 242.9$  Hz), 148.9, 147.8, 139.8, 139.2 (d,  $J = 7.6$  Hz), 132.9 (d,  $J = 7.8$  Hz), 132.5, 130.9, 130.9 (d,  $J = 3.4$  Hz), 130.8, 130.6, 129.9, 126.3, 122.5, 121.8, 115.9 (d,  $J = 20.5$  Hz), 114.4 (d,  $J = 21.3$  Hz), 39.4 (d,  $J = 1.7$  Hz), 20.9, 14.7.

<sup>19</sup>F NMR (376 MHz, Chloroform-*d*)  $\delta$  -118.53.

HRMS (ESI-TOF): calcd. [M+Na]<sup>+</sup> 392.0830; found: 392.0836.

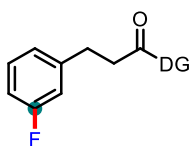**2-(2-Chloropyridin-3-yl)phenyl 4-(3-fluorophenyl)butanoate (4a).**

Purification via TLC (PE: EA = 7:1, v/v) afforded the desired product as colorless oil (0.058g, 0.158 mmol, 79% yield);

<sup>1</sup>H NMR (600 MHz, Chloroform-*d*)  $\delta$  8.41 (dd,  $J = 4.8, 2.0$  Hz, 1H), 7.64 (dd,  $J = 7.5, 2.0$  Hz, 1H), 7.50 (td,  $J = 7.7, 1.8$  Hz, 1H), 7.38 - 7.32 (m, 3H), 7.26 - 7.19 (m, 2H), 6.91 (dt,  $J = 13.8, 5.1$  Hz, 1H), 6.82 (dt,  $J = 10.1, 2.1$  Hz, 1H), 2.50 (t,  $J = 7.7$  Hz, 2H), 2.33 (t,  $J = 7.3$  Hz, 2H), 1.79 (p,  $J = 7.2$  Hz, 1H).

<sup>13</sup>C NMR (151 MHz, Chloroform-*d*)  $\delta$  171.2, 162.9 (d,  $J = 245.4$  Hz), 149.0, 143.5 (d,  $J = 7.1$  Hz), 140.2, 133.0, 130.7, 130.6, 130.0, 129.8 (d,  $J = 8.3$  Hz), 129.0, 128.6, 126.2, 124.0 (d,  $J = 2.8$  Hz), 122.6, 122.1, 115.2 (d,  $J = 21.0$  Hz), 112.9 (d,  $J = 21.2$  Hz), 34.4 (d,  $J = 1.6$  Hz), 33.2, 25.8.

<sup>19</sup>F NMR (565 MHz, Chloroform-*d*)  $\delta$  -113.61.

HRMS (ESI-TOF): calcd. [M+Na]<sup>+</sup> 392.0824; found: 392.0831.

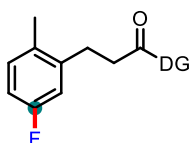**2-(2-Chloropyridin-3-yl)phenyl 3-(5-fluoro-2-methylphenyl)propanoate (4b).**

Purification via TLC (PE: EA = 7:1, v/v) afforded the desired product as colorless oil (0.066g, 0.18 mmol, 90% yield);

<sup>1</sup>H NMR (400 MHz, Chloroform-*d*)  $\delta$  8.41 (dd,  $J = 4.8, 2.0$  Hz, 1H), 7.61 (dd,  $J = 7.5, 2.0$  Hz, 1H), 7.51 (ddd,  $J = 8.2, 7.2, 2.0$  Hz, 1H), 7.38 (td,  $J = 7.4, 1.2$  Hz, 1H), 7.34 (dd,  $J = 7.6, 2.0$  Hz, 1H), 7.28 - 7.19 (m, 2H), 7.09 (dd,  $J = 8.3, 5.9$  Hz, 1H), 6.91 - 6.67 (m, 2H), 2.75 (t,  $J = 7.7$  Hz, 2H), 2.65 - 2.52 (m, 2H), 2.22 (s, 3H).

<sup>13</sup>C NMR (101 MHz, Chloroform-*d*)  $\delta$  170.7, 161.2 (d,  $J = 243.3$  Hz), 150.6, 149.0, 147.9, 140.1, 139.9 (d,  $J = 7.0$  Hz), 132.9, 131.5 (d,  $J = 3.8$  Hz), 131.4, 130.8, 130.5, 130.0, 126.3, 122.6, 122.1, 114.9 (d,  $J = 21.3$  Hz), 113.0 (d,  $J = 20.6$  Hz), 33.9, 27.8 (d,  $J = 1.6$  Hz), 18.5.

<sup>19</sup>F NMR (376 MHz, Chloroform-*d*)  $\delta$  -117.45.

**HRMS (ESI-TOF):** calcd.  $[M+Na]^+$  392.0830; found: 392.0822.

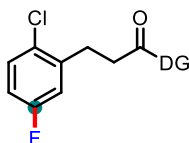

**2-(2-Chloropyridin-3-yl)phenyl 3-(2-chloro-5-fluorophenyl)propanoate (4c).**

Purification via TLC (PE: EA = 7:1, v/v) afforded the desired product as colorless oil (0.045g, 0.116 mmol, 58% yield);

**<sup>1</sup>H NMR** (400 MHz, Chloroform-*d*)  $\delta$  8.47 - 8.32 (m, 1H), 7.58 (dd,  $J$  = 7.5, 1.9 Hz, 1H), 7.48 (ddd,  $J$  = 8.0, 7.1, 2.0 Hz, 1H), 7.42 - 7.26 (m, 2H), 7.26 - 7.16 (m, 3H), 6.94 - 6.82 (m, 2H), 2.87 (t,  $J$  = 7.7 Hz, 2H), 2.64 (d,  $J$  = 8.2 Hz, 2H).

**<sup>13</sup>C NMR** (101 MHz, Chloroform-*d*)  $\delta$  170.4, 161.2 (d,  $J$  = 246.4 Hz), 150.6, 149.0, 147.9, 140.0, 139.4 (d,  $J$  = 7.6 Hz), 132.8, 130.8, 130.7, 130.5, 128.7, 126.2, 122.5, 122.0, 117.3 (d,  $J$  = 4.9 Hz), 117.1 (d,  $J$  = 3.2 Hz), 115.0 (d,  $J$  = 3.0 Hz), 114.8 (d,  $J$  = 3.0 Hz), 33.3, 28.5.

**<sup>19</sup>F NMR** (376 MHz, Chloroform-*d*)  $\delta$  -110.77.

**HRMS (ESI-TOF):** calcd.  $[M+Na]^+$  412.0283; found: 412.0292.

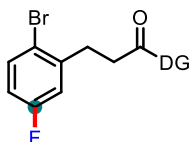

**2-(2-Chloropyridin-3-yl)phenyl 3-(2-bromo-5-fluorophenyl)propanoate (4d).**

Purification via TLC (PE: EA = 7:1, v/v) afforded the desired product as colorless oil (0.033g, 0.078 mmol, 39% yield);

**<sup>1</sup>H NMR** (400 MHz, Chloroform-*d*)  $\delta$  8.39 (dd,  $J$  = 4.7, 1.9 Hz, 1H), 7.58 (dt,  $J$  = 7.5, 1.7 Hz, 1H), 7.51 - 7.41 (m, 2H), 7.39 - 7.30 (m, 2H), 7.26 - 7.17 (m, 2H), 6.90 (dd,  $J$  = 9.2, 3.0 Hz, 1H), 6.82 (td,  $J$  = 8.3, 2.9 Hz, 1H), 2.87 (t,  $J$  = 7.7 Hz, 2H), 2.62 (t,  $J$  = 7.7 Hz, 2H).

**<sup>13</sup>C NMR** (101 MHz, Chloroform-*d*)  $\delta$  170.3, 161.9 (d,  $J$  = 247.0 Hz), 150.6, 149.1, 147.9, 141.2 (d,  $J$  = 7.6 Hz), 140.1, 134.0 (d,  $J$  = 8.3 Hz), 132.9, 130.8, 130.5, 130.0, 126.3, 122.6, 122.1, 118.3 (d,  $J$  = 3.2 Hz), 117.5 (d,  $J$  = 3.5 Hz), 117.3 (d,  $J$  = 3.5 Hz), 33.5, 31.1.

**<sup>19</sup>F NMR** (376 MHz, Chloroform-*d*)  $\delta$  -114.56.

**HRMS (ESI-TOF):** calcd.  $[M+Na]^+$  455.9778; found: 455.9778.

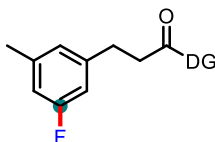

**2-(2-Chloropyridin-3-yl)phenyl 3-(3-fluoro-5-methylphenyl)propanoate (4e).**

Purification via TLC (PE: EA = 7:1, v/v) afforded the desired product as colorless oil (0.064g, 0.176 mmol, 88% yield);

**<sup>1</sup>H NMR** (400 MHz, Chloroform-*d*)  $\delta$  8.41 (dd,  $J = 4.8, 2.0$  Hz, 1H), 7.59 (dd,  $J = 7.5, 2.0$  Hz, 1H), 7.50 (ddd,  $J = 8.2, 7.1, 2.1$  Hz, 1H), 7.41 - 7.31 (m, 2H), 7.26 (dd,  $J = 7.5, 4.8$  Hz, 1H), 7.19 (dd,  $J = 8.1, 1.2$  Hz, 1H), 6.78 - 6.58 (m, 3H), 2.76 (t,  $J = 7.9$  Hz, 2H), 2.62 (s, 2H), 2.33 (s, 3H).

**<sup>13</sup>C NMR** (101 MHz, Chloroform-*d*)  $\delta$  170.7, 162.8 (d,  $J = 245.1$  Hz), 150.6, 149.0, 147.9, 141.9 (d,  $J = 7.9$  Hz), 140.4 (d,  $J = 8.2$  Hz), 140.1, 132.8, 130.8, 130.5, 130.0, 126.2, 124.7 (d,  $J = 2.4$  Hz), 122.6, 122.1, 113.9 (d,  $J = 20.9$  Hz), 112.1 (d,  $J = 21.3$  Hz), 35.2, 30.2 (d,  $J = 1.8$  Hz), 21.3 (d,  $J = 1.8$  Hz).

**<sup>19</sup>F NMR** (376 MHz, Chloroform-*d*)  $\delta$  -114.44.

**HRMS (ESI-TOF)**: calcd.  $[M+Na]^+$  392.0830; found: 392.0826.

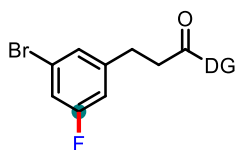

#### 2-(2-Chloropyridin-3-yl)phenyl 3-(3-bromo-5-fluorophenyl)propanoate (4f).

Purification via TLC (PE: EA = 7:1, v/v) afforded the desired product as colorless oil (0.025g, 0.058 mmol, 29% yield);

**<sup>1</sup>H NMR** (400 MHz, Chloroform-*d*)  $\delta$  8.42 (dd,  $J = 4.9, 2.0$  Hz, 1H), 7.58 (dd,  $J = 7.5, 1.9$  Hz, 1H), 7.50 (td,  $J = 7.7, 1.9$  Hz, 1H), 7.44 - 7.31 (m, 2H), 7.26 (dd,  $J = 7.5, 4.7$  Hz, 1H), 7.20 (dd,  $J = 8.2, 1.1$  Hz, 1H), 7.16 - 7.07 (m, 2H), 6.79 (dt,  $J = 9.3, 2.0$  Hz, 1H), 3.02 - 2.40 (m, 4H).

**<sup>13</sup>C NMR** (101 MHz, Chloroform-*d*)  $\delta$  170.30, 162.60 (d,  $J = 250.7$  Hz), 150.59, 149.08, 147.84, 143.89 (d,  $J = 8.0$  Hz), 140.07, 132.82, 130.87, 130.51, 130.07, 127.34 (d,  $J = 3.1$  Hz), 126.35, 122.54, 122.51 (d,  $J = 10.1$  Hz), 122.12, 117.24 (d,  $J = 24.5$  Hz), 114.35 (d,  $J = 21.2$  Hz), 34.86, 29.88 (d,  $J = 1.8$  Hz).

**<sup>19</sup>F NMR** (376 MHz, Chloroform-*d*)  $\delta$  -110.71.

**HRMS (ESI-TOF)**: calcd.  $[M+Na]^+$  455.9778; found: 455.9783.

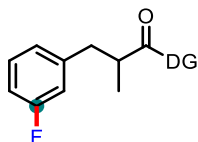

#### 2-(2-Chloropyridin-3-yl)phenyl 3-(3-fluorophenyl)-2-methylpropanoate (4g).

Purification via TLC (PE: EA = 7:1, v/v) afforded the desired product as colorless oil (0.055g, 0.15 mmol, 75% yield);

**<sup>1</sup>H NMR** (400 MHz, Chloroform-*d*)  $\delta$  8.41 (dd,  $J = 4.8, 2.0$  Hz, 1H), 7.60 (s, 1H), 7.54 - 7.41 (m, 1H), 7.41 - 7.29 (m, 2H), 7.25 (td,  $J = 7.9, 6.0$  Hz, 2H), 7.14 - 7.01 (m, 1H), 6.99 - 6.89 (m, 2H), 6.84 (dt,  $J = 9.8, 2.1$  Hz, 1H), 2.90 (dd,  $J = 13.6, 7.4$  Hz, 1H), 2.76 (s, 1H), 2.55 (dd,  $J = 13.5, 7.2$  Hz, 1H), 1.62 (d,  $J = 1.7$  Hz, 3H).

**<sup>13</sup>C NMR** (101 MHz, Chloroform-*d*)  $\delta$  166.8, 162.7 (d,  $J = 245.8$  Hz), 150.7, 149.0, 147.9, 141.3 (d,  $J = 7.4$  Hz), 140.2, 132.9, 130.7, 130.6, 130.0, 129.8 (d,  $J = 8.4$  Hz), 126.2, 124.6 (d,  $J = 2.9$  Hz), 122.5, 122.0, 115.8 (d,  $J = 21.1$  Hz), 113.4 (d,  $J = 21.0$  Hz), 38.7 (d,  $J = 1.8$  Hz), 38.7, 16.5.

**<sup>19</sup>F NMR** (376 MHz, Chloroform-*d*)  $\delta$  -113.38.

**HRMS (ESI-TOF)**: calcd.  $[M+Na]^+$  392.0830; found: 392.0828.

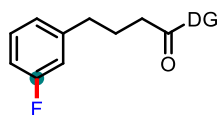

**2-(2-Chloropyridin-3-yl)phenyl 4-(3-fluorophenyl)butanoate (4h).**

Purification via TLC (PE: EA = 7:1, v/v) afforded the desired product as colorless oil (0.039g, 0.108 mmol, 54% yield);

<sup>1</sup>H NMR (400 MHz, Chloroform-*d*)  $\delta$  8.57 - 8.26 (m, 1H), 7.64 (dd,  $J = 7.5, 1.9$  Hz, 1H), 7.51 (td,  $J = 7.7, 2.0$  Hz, 1H), 7.45 - 7.29 (m, 3H), 7.24 (dd,  $J = 10.5, 7.5$  Hz, 2H), 7.11 - 6.74 (m, 3H), 2.48 (dt,  $J = 12.9, 7.6$  Hz, 2H), 2.33 (t,  $J = 7.3$  Hz, 2H), 1.79 (p,  $J = 7.6$  Hz, 2H).

<sup>13</sup>C NMR (101 MHz, Chloroform-*d*)  $\delta$  171.3, 162.9 (d,  $J = 245.5$  Hz), 150.7, 149.0, 147.9, 143.5 (d,  $J = 7.2$  Hz), 140.2, 133.0, 130.8, 130.6, 130.0, 129.8 (d,  $J = 8.4$  Hz), 126.2, 124.1 (d,  $J = 2.7$  Hz), 122.6, 122.1, 115.2 (d,  $J = 20.9$  Hz), 112.9 (d,  $J = 21.0$  Hz), 34.4 (d,  $J = 1.4$  Hz), 33.2, 25.8.

<sup>19</sup>F NMR (376 MHz, Chloroform-*d*)  $\delta$  -113.61.

HRMS (ESI-TOF): calcd.  $[M+Na]^+$  392.0830; found: 392.0823.

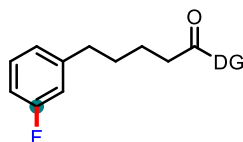

**2-(2-Chloropyridin-3-yl)phenyl 5-(3-fluorophenyl)pentanoate (4i).**

Purification via TLC (PE: EA = 7:1, v/v) afforded the desired product as colorless oil (0.032g, 0.086 mmol, 43% yield);

<sup>1</sup>H NMR (400 MHz, Chloroform-*d*)  $\delta$  8.36 (dt,  $J = 4.4, 2.1$  Hz, 1H), 7.62 (dd,  $J = 7.5, 2.0$  Hz, 1H), 7.50 (td,  $J = 7.6, 1.9$  Hz, 1H), 7.44 - 7.30 (m, 3H), 7.27 - 7.18 (m, 2H), 7.13 - 6.95 (m, 1H), 6.95 - 6.82 (m, 2H), 2.54 (dt,  $J = 11.3, 7.0$  Hz, 2H), 2.41 - 2.27 (m, 2H), 1.47 (dq,  $J = 9.1, 5.0, 3.9$  Hz, 4H).

<sup>13</sup>C NMR (101 MHz, Chloroform-*d*)  $\delta$  171.5, 162.9 (d,  $J = 245.2$  Hz), 150.6, 148.9, 148.0, 144.4 (d,  $J = 7.0$  Hz), 140.2, 133.0, 130.7, 130.0, 129.7 (d,  $J = 8.4$  Hz), 128.9, 126.1, 124.0 (d,  $J = 2.7$  Hz), 122.6, 122.1, 115.2 (d,  $J = 20.7$  Hz), 112.7 (d,  $J = 21.0$  Hz), 35.1 (d,  $J = 1.6$  Hz), 33.9, 30.2, 24.1.

<sup>19</sup>F NMR (376 MHz, Chloroform-*d*)  $\delta$  -113.86.

HRMS (ESI-TOF): calcd.  $[M+Na]^+$  406.0986; found: 406.0989.

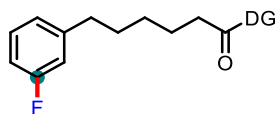

**2-(2-Chloropyridin-3-yl)phenyl 6-(3-fluorophenyl)hexanoate (4j).**

Purification via TLC (PE: EA = 7:1, v/v) afforded the desired product as colorless oil (0.027 g, 0.07 mmol, 35% yield);

<sup>1</sup>H NMR (400 MHz, Chloroform-*d*)  $\delta$  8.42 (dq,  $J = 5.0, 3.1, 2.4$  Hz, 1H), 7.63 (dt,  $J = 7.4, 1.3$  Hz, 1H), 7.50 (ddd,  $J = 8.1, 7.2, 2.0$  Hz, 1H), 7.44 - 7.29 (m, 3H), 7.29 - 7.17 (m, 2H), 7.16 - 7.08 (m, 1H), 7.02 - 6.82 (m, 2H), 2.56 (dt,  $J = 11.6, 7.7$  Hz, 2H), 2.31 (td,  $J = 7.4, 1.6$  Hz, 2H), 1.61 - 1.41 (m, 4H), 1.20 (tt,  $J = 9.9, 6.2$  Hz, 2H).

<sup>13</sup>C NMR (101 MHz, Chloroform-*d*)  $\delta$  171.6, 161.2 (d,  $J = 243.0$  Hz), 150.7, 148.9, 148.0, 144.9 (d,  $J = 7.1$  Hz), 140.2, 137.9 (d,  $J = 3.2$  Hz), 133.1, 130.7, 130.6, 130.0, 129.7, 129.6, 126.1, 124.0.

(d,  $J = 3.0$  Hz), 122.6, 122.1, 115.0 (d,  $J = 21.0$  Hz), 112.6 (d,  $J = 21.1$  Hz), 34.7, 34.0 (d,  $J = 2.3$  Hz), 31.0, 28.3, 24.5.

$^{19}\text{F}$  NMR (376 MHz, Chloroform- $d$ )  $\delta$  -117.98.

HRMS (ESI-TOF): calcd.  $[\text{M}+\text{Na}]^+$  420.1143; found: 420.1149.

## 10. Failed or less successful substrates

The limitation of the substrate scope was summarized as below. Under the optimized reaction conditions, the *para*-substituted substrates did not afford the target product, with only starting material recovered (defined as N.R.). This is probably due to significantly increased steric hindrance. In addition, the substrates bearing strong electron-withdrawing groups, such as cyano and carbonyl, were less successful in this reaction, probably because of that the low electron density of target aromatic ring is less favored for the electrophilic C-H palladation. We also tried drug-relevant substrates, however, most of them have a *para*-substituents, which prohibited the *meta*-C-H fluorination and resulted in only trace of the product.

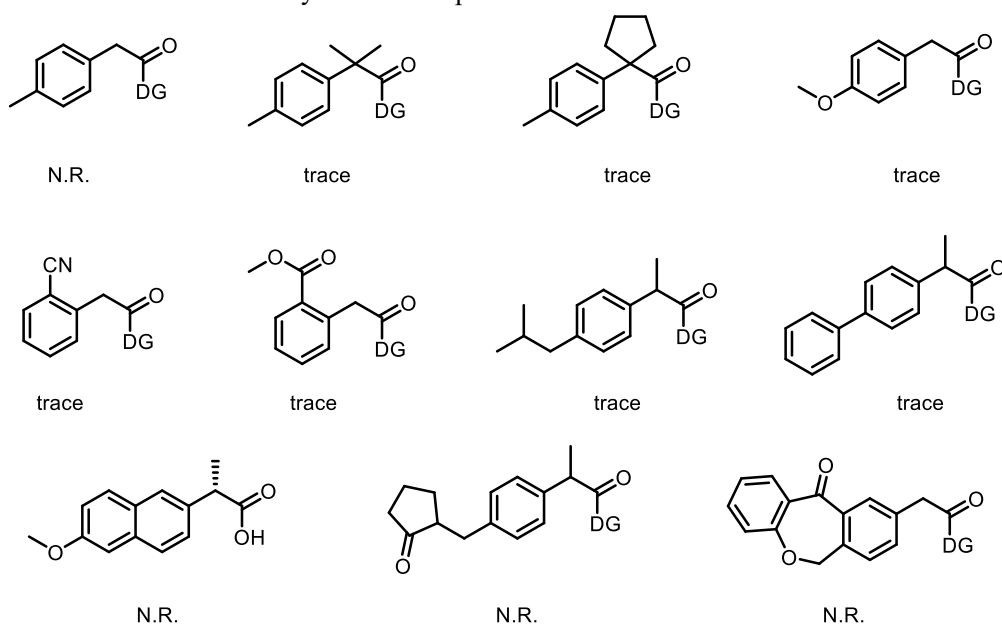

For the substrate bearing an electron-donating group (e.g. phenoxy, methoxy) at the *meta*-position, poor regioselectivity was observed due to the background electrophilic fluorination, which resulted in a complex mixture of regioisomers and separation was highly challenging.

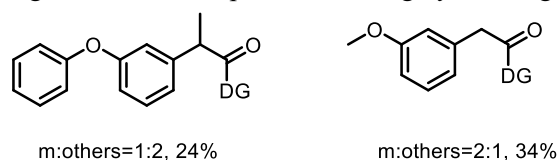





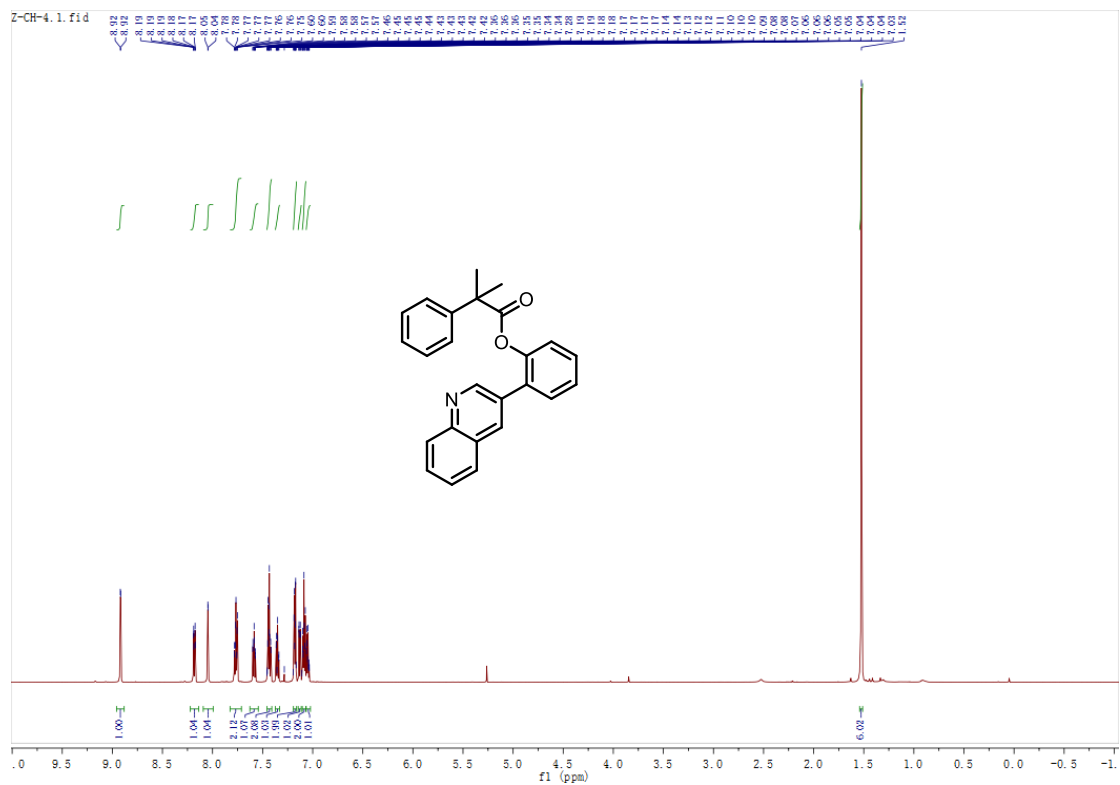

1H NMR spectrum of DG-4 (500 MHz, CDCl<sub>3</sub>)

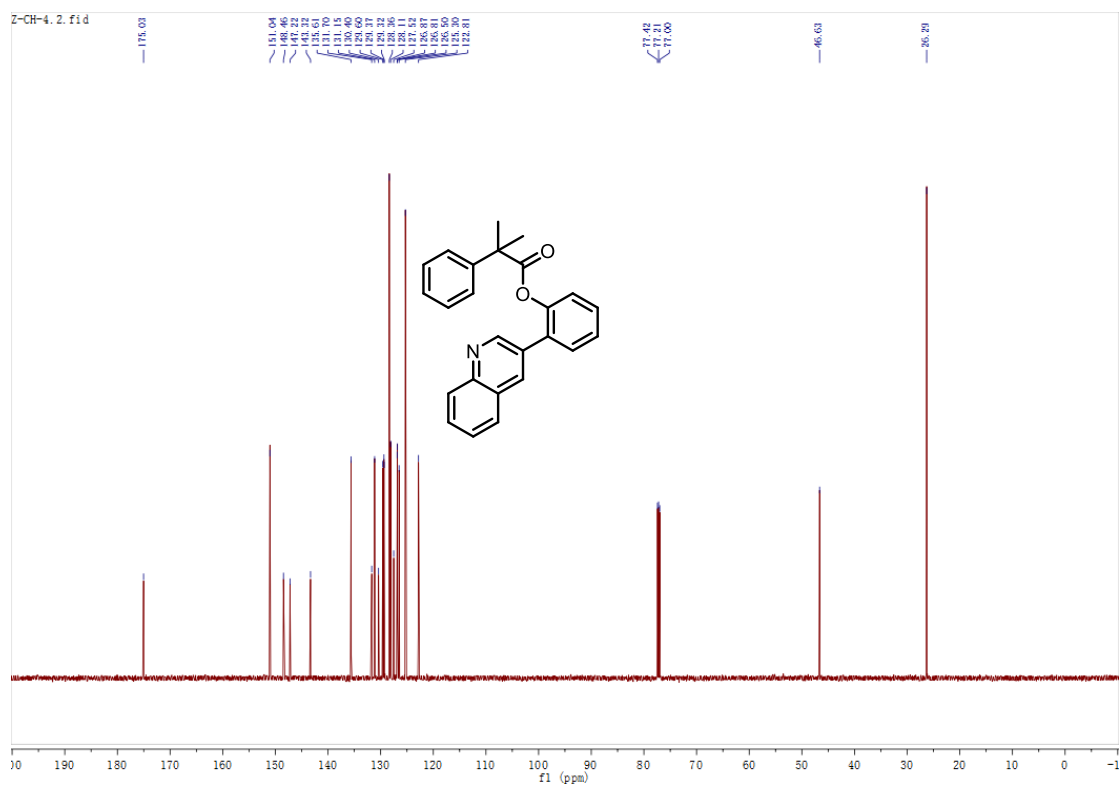

13C NMR spectrum of DG-4 (126 MHz, CDCl<sub>3</sub>)

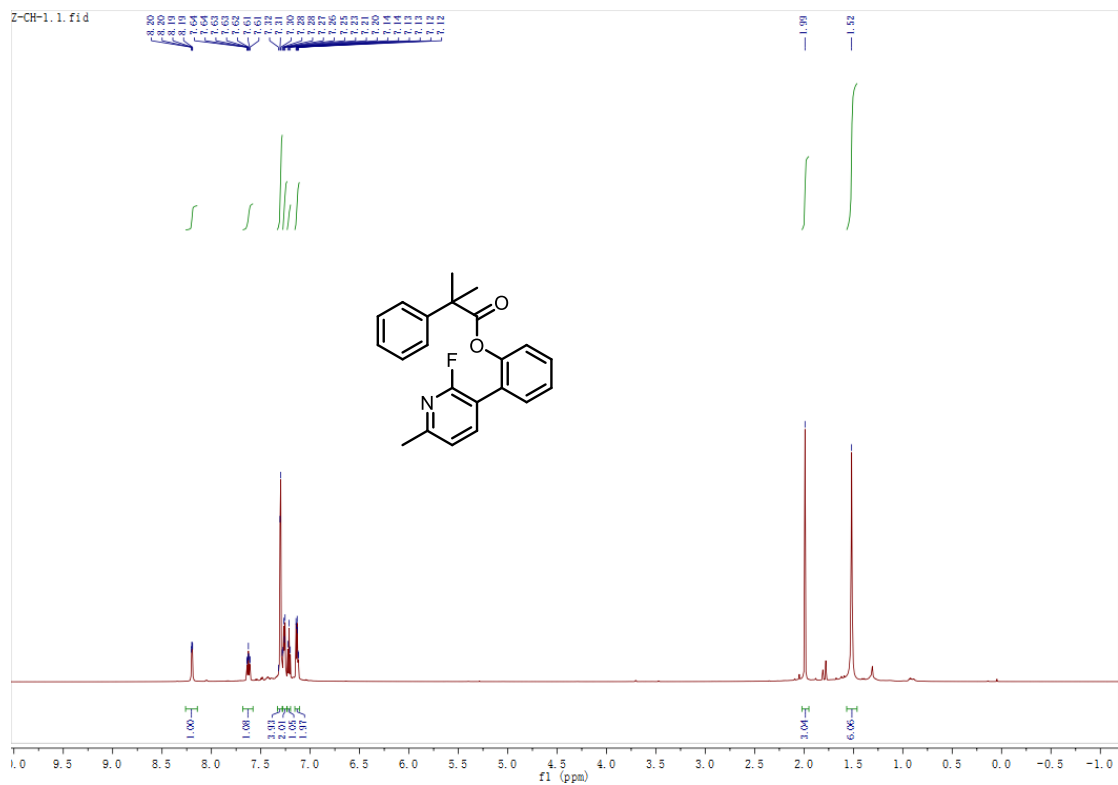

**<sup>1</sup>H NMR spectrum of DG-7 (500 MHz, CDCl<sub>3</sub>)**

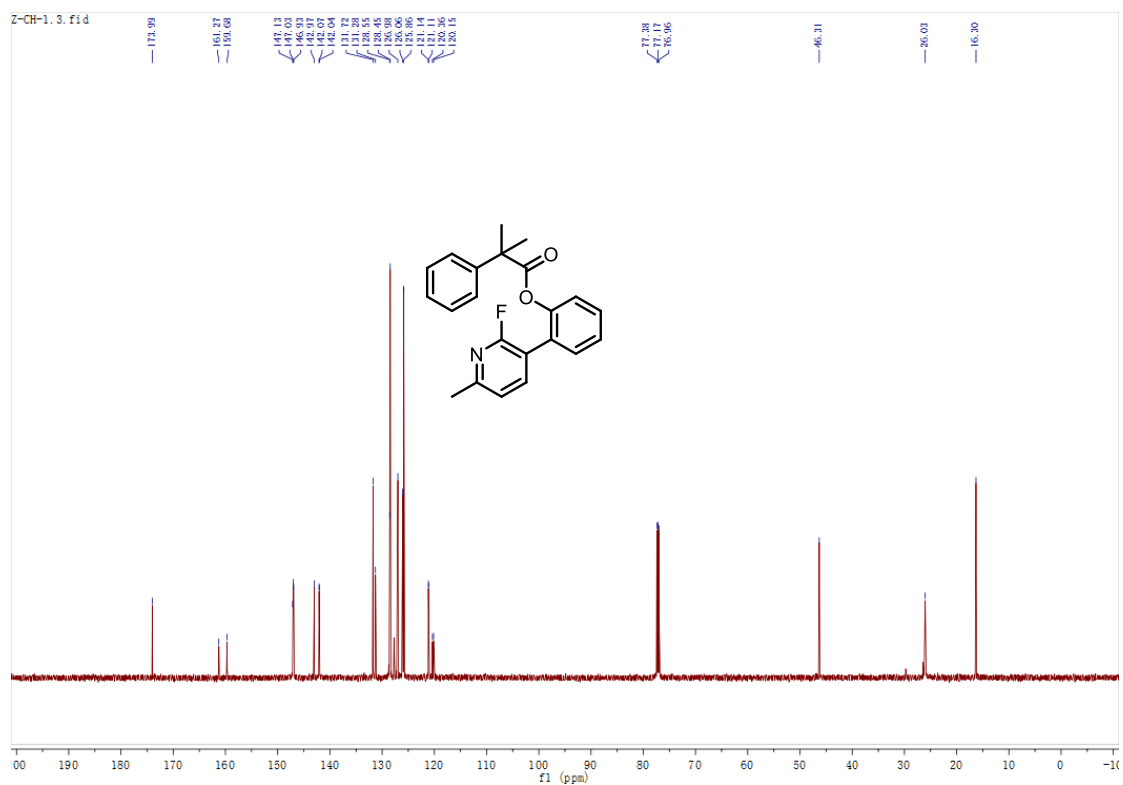

**<sup>13</sup>C NMR spectrum of DG-7 (126 MHz, CDCl<sub>3</sub>)**

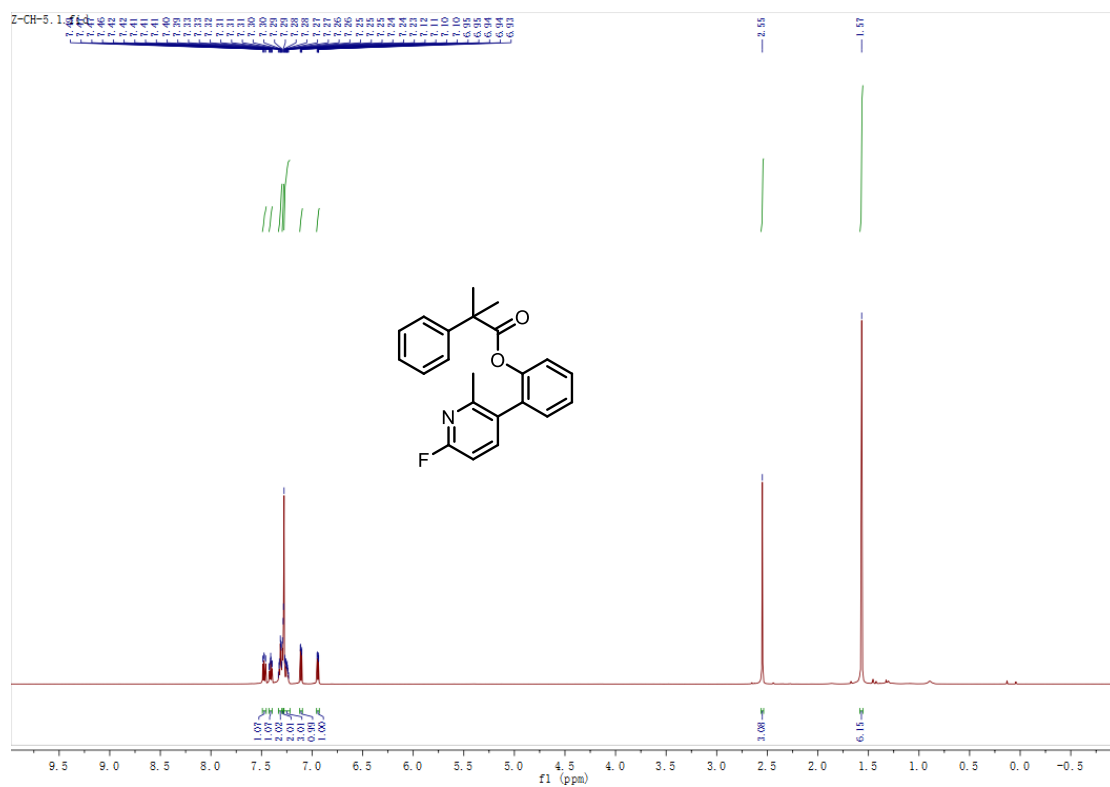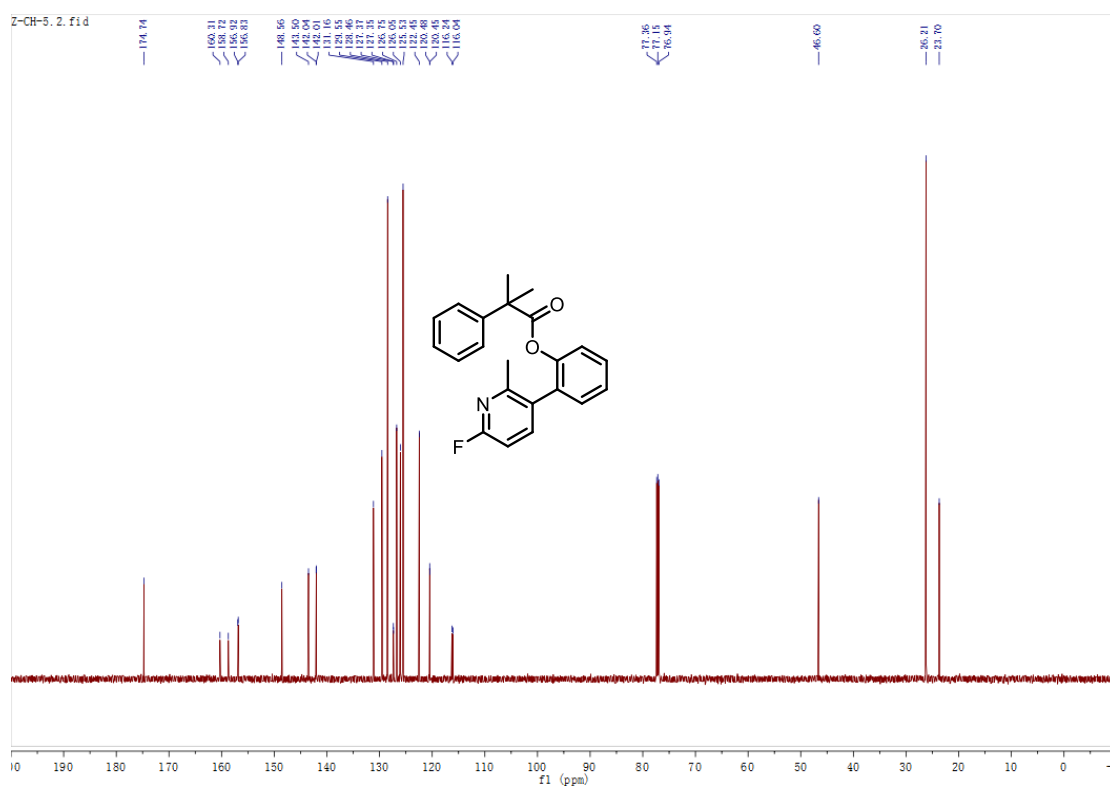

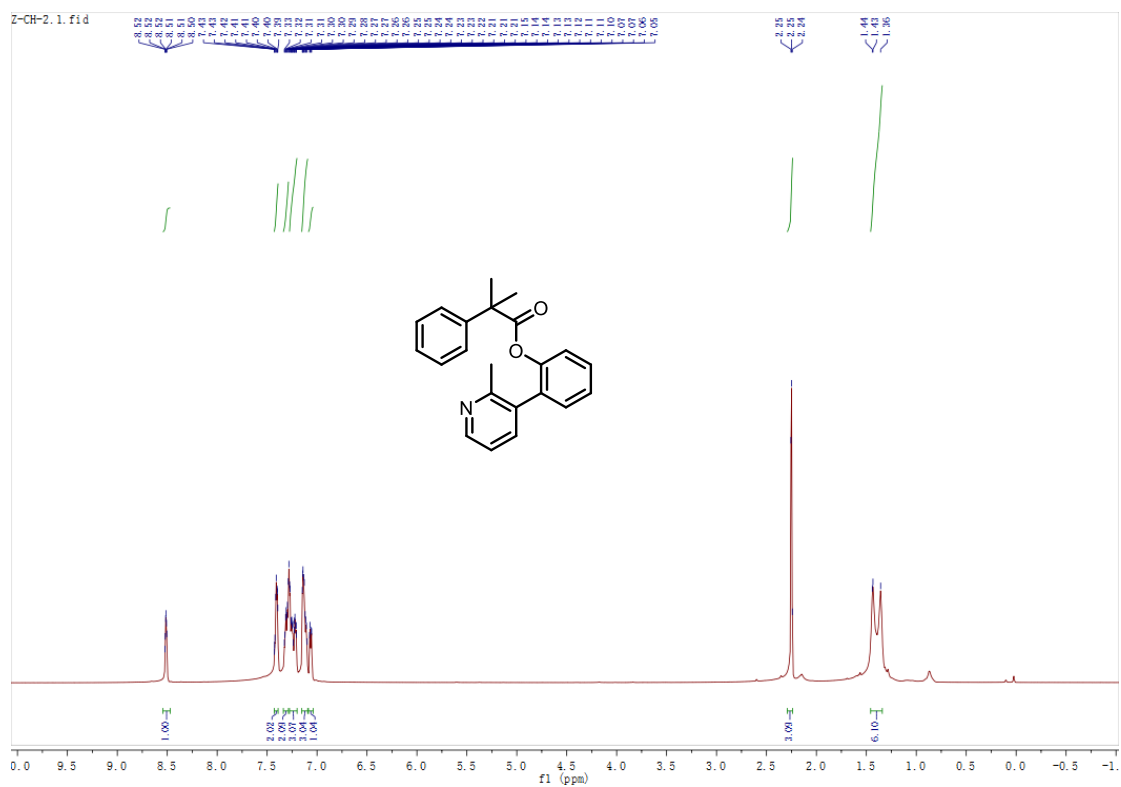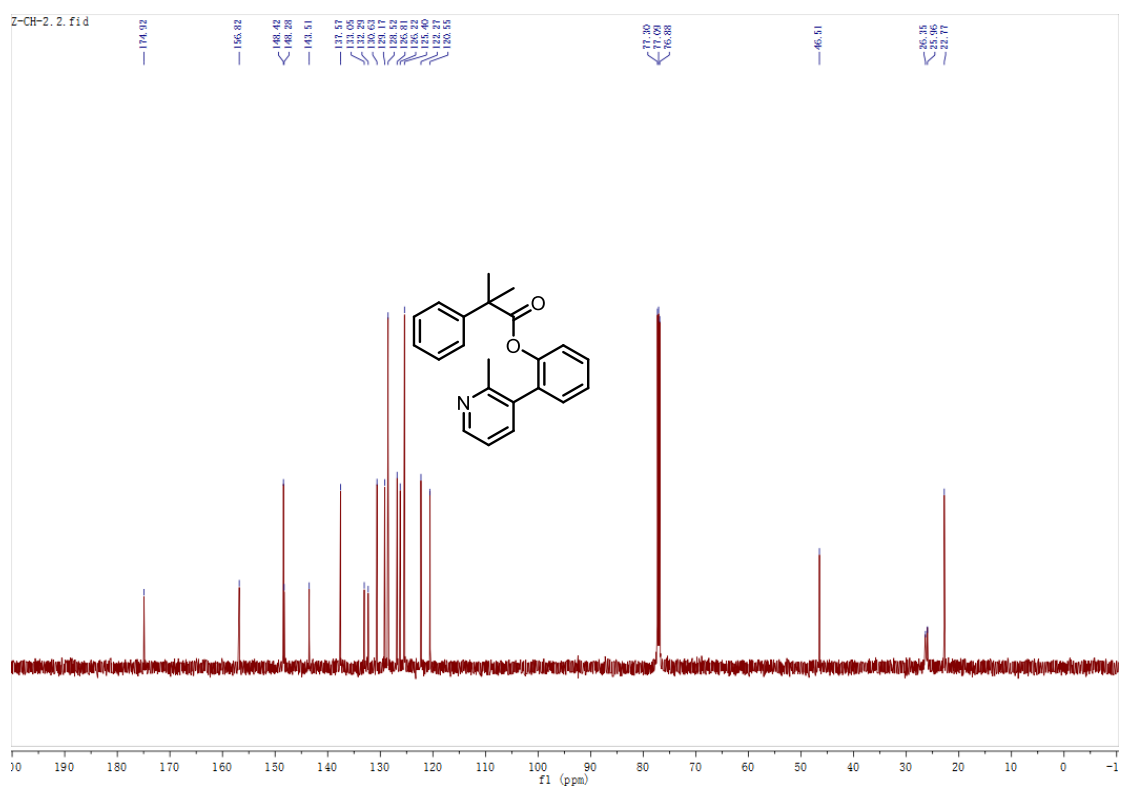

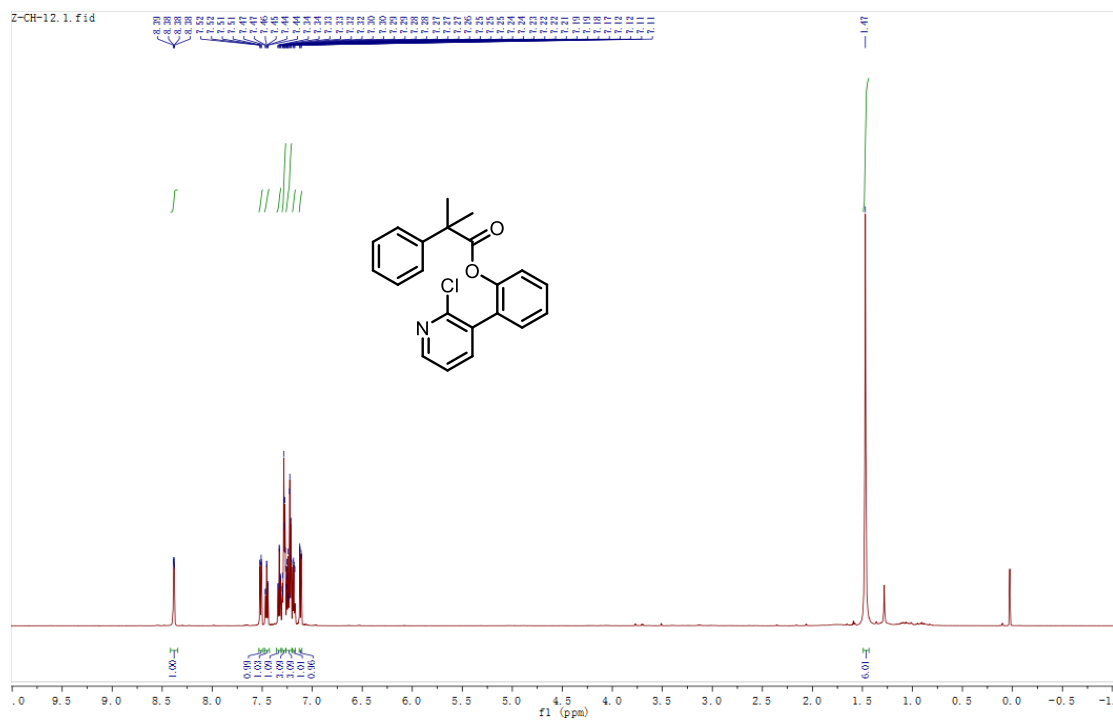

<sup>1</sup>H NMR spectrum of DG-10 (500 MHz, CDCl<sub>3</sub>)

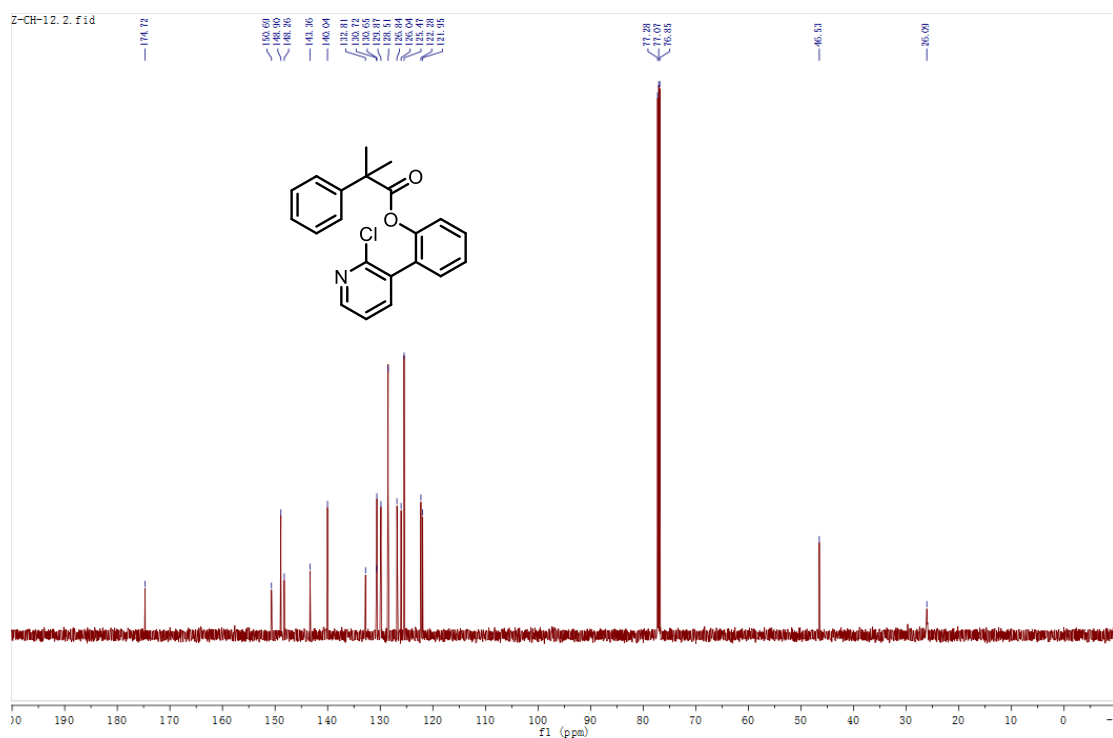

<sup>13</sup>C NMR spectrum of DG-10 (126 MHz, CDCl<sub>3</sub>)



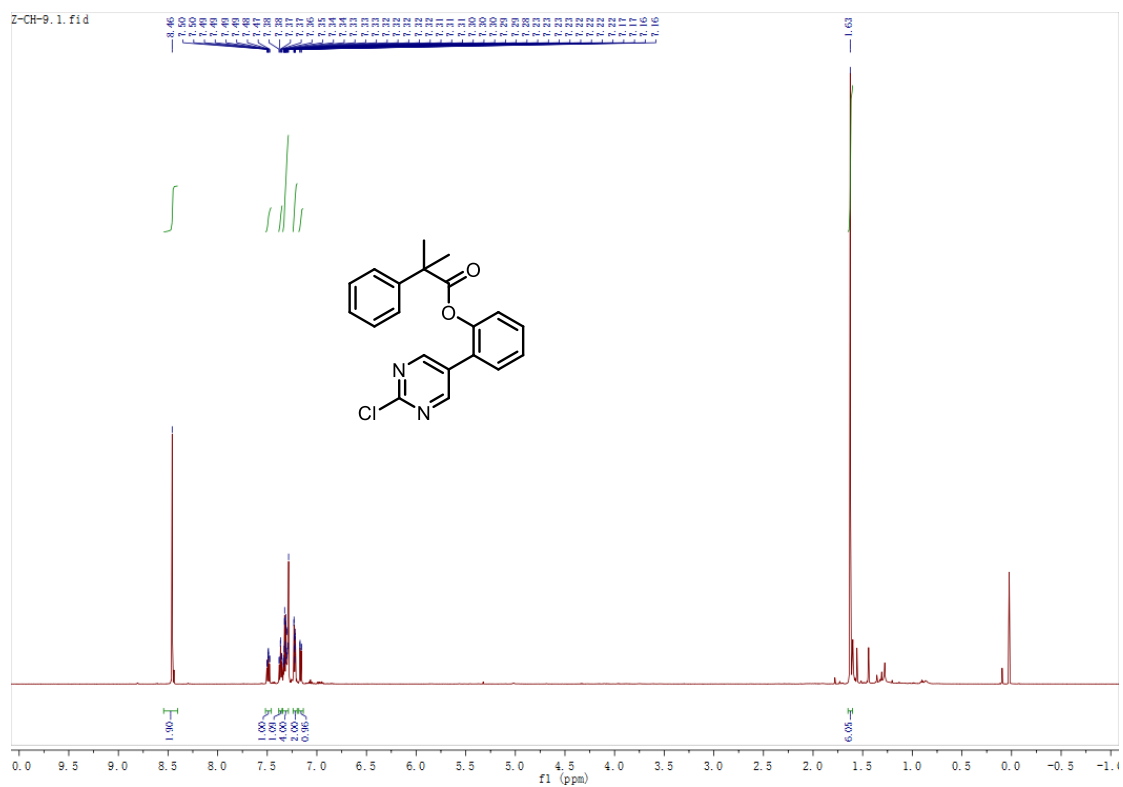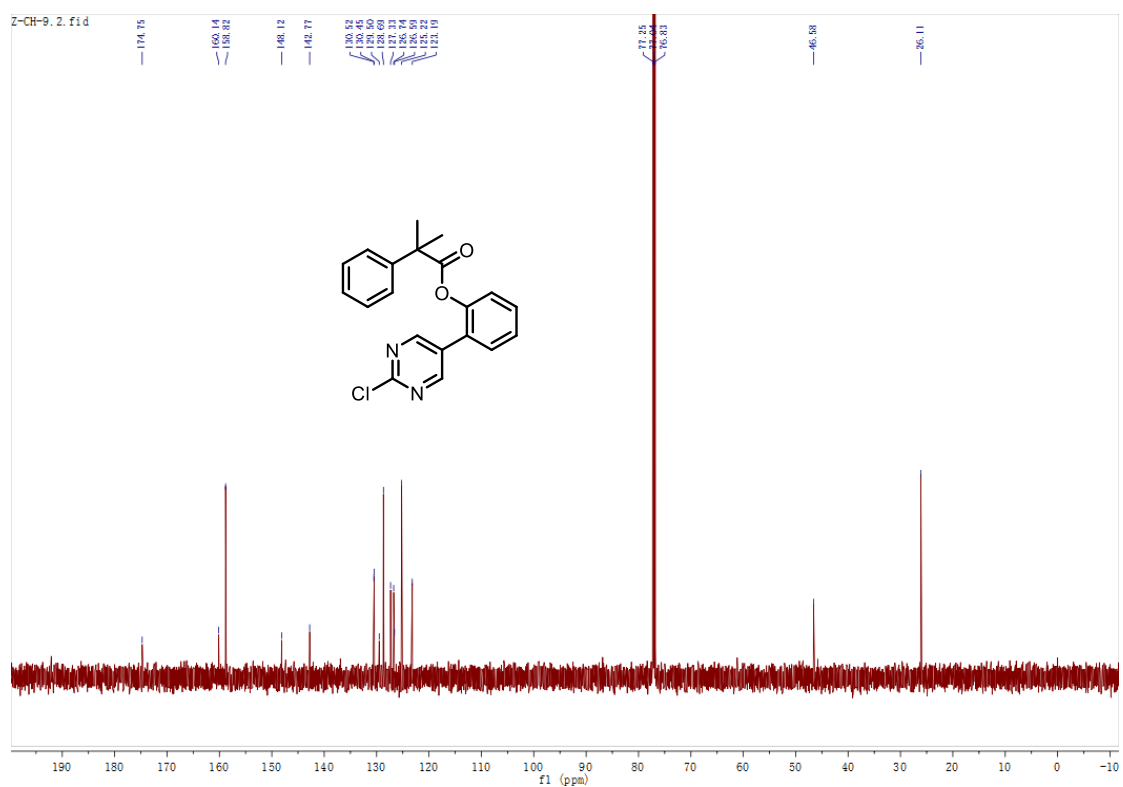

## 10.2 NMR spectra of products

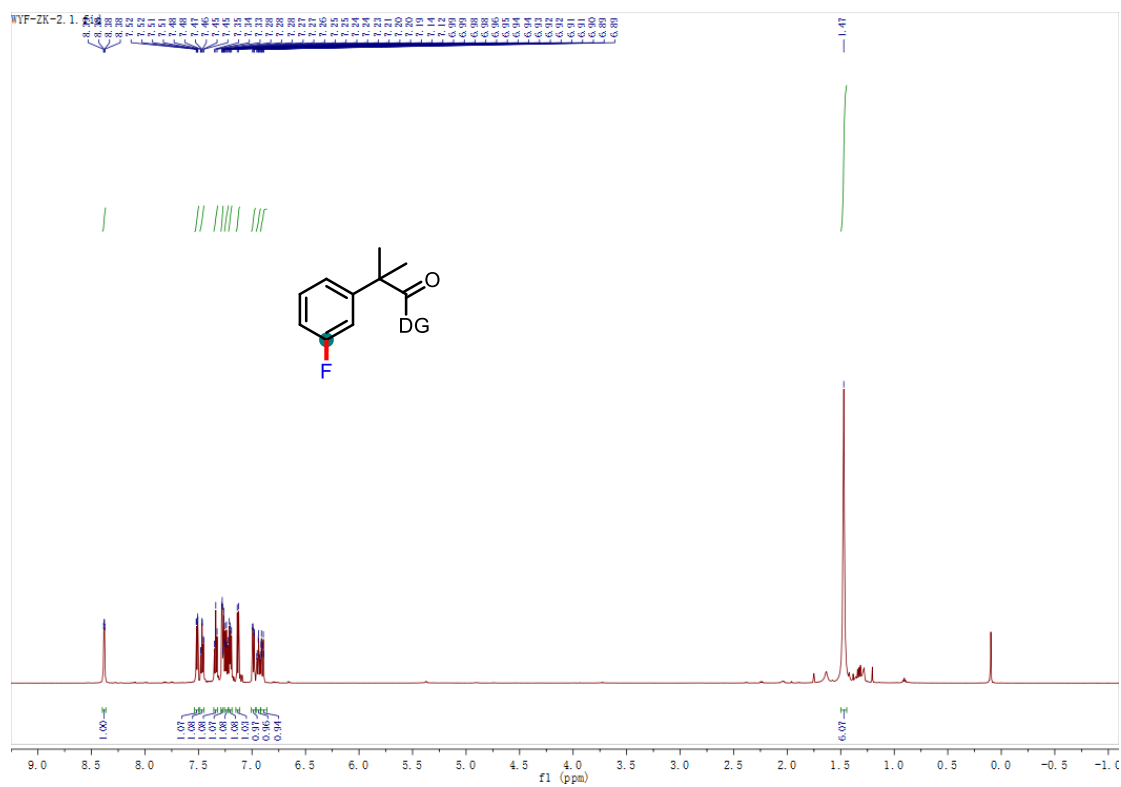

$^1\text{H}$  NMR spectrum of 2a (600 MHz,  $\text{CDCl}_3$ )

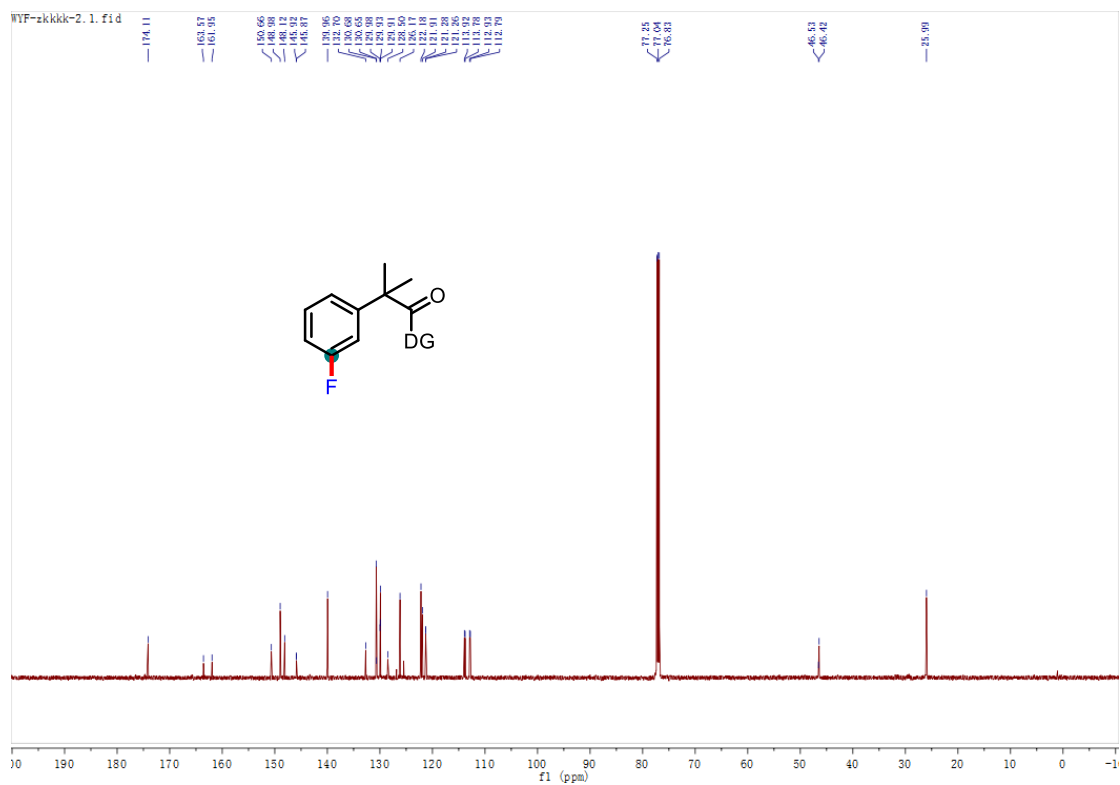

$^{13}\text{C}$  NMR spectrum of 2a (151 MHz,  $\text{CDCl}_3$ )

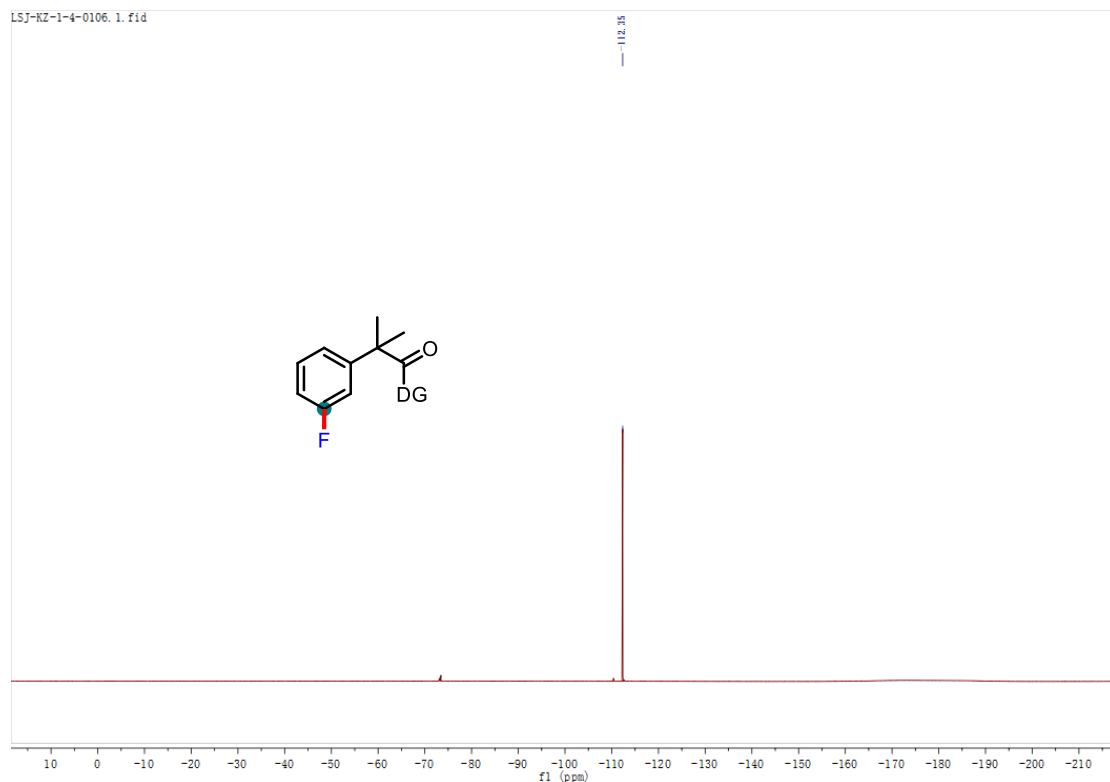

**<sup>19</sup>F NMR spectrum of 2a (565 MHz, CDCl<sub>3</sub>)**

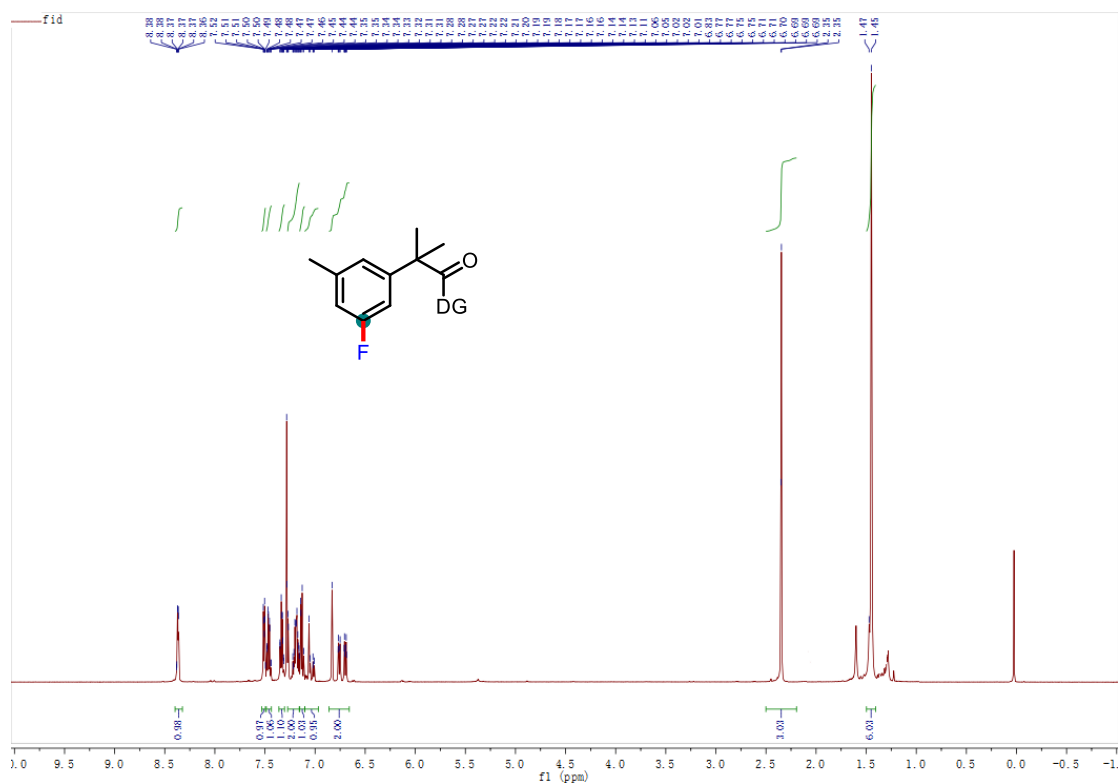

**<sup>1</sup>H NMR spectrum of 2b (600 MHz, CDCl<sub>3</sub>)**

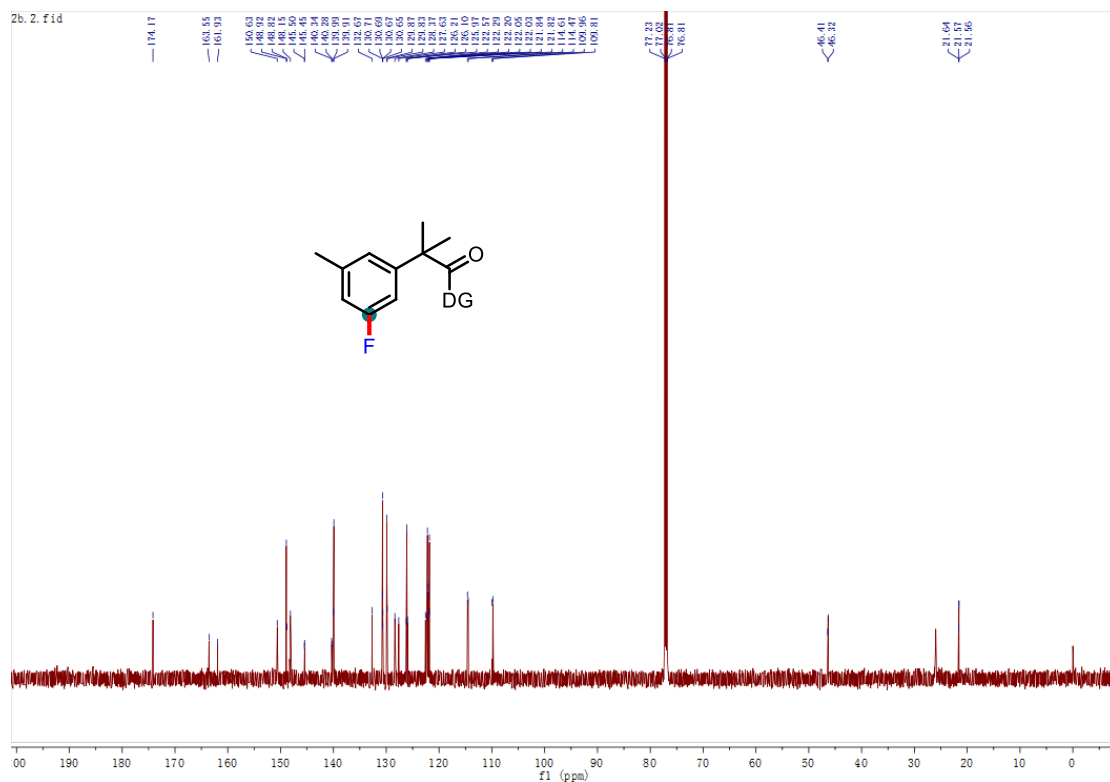

$^{13}\text{C}$  NMR spectrum of 2b (151 MHz,  $\text{CDCl}_3$ )

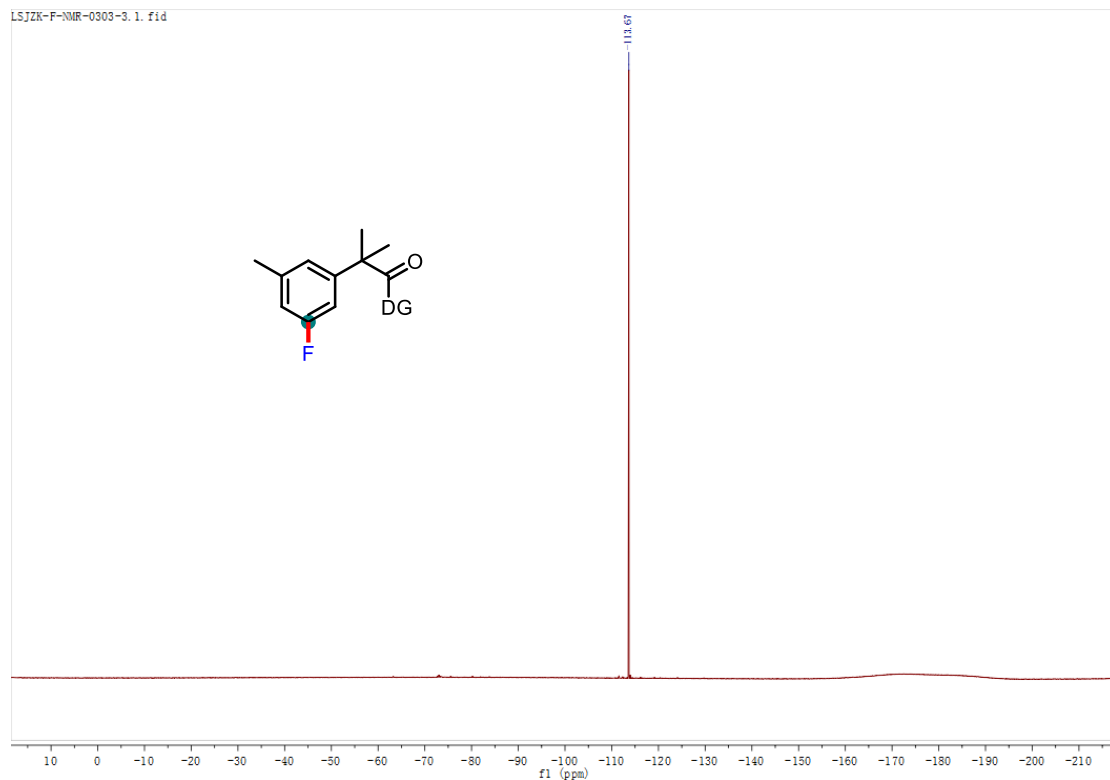

$^{19}\text{F}$  NMR spectrum of 2b (565 MHz,  $\text{CDCl}_3$ )

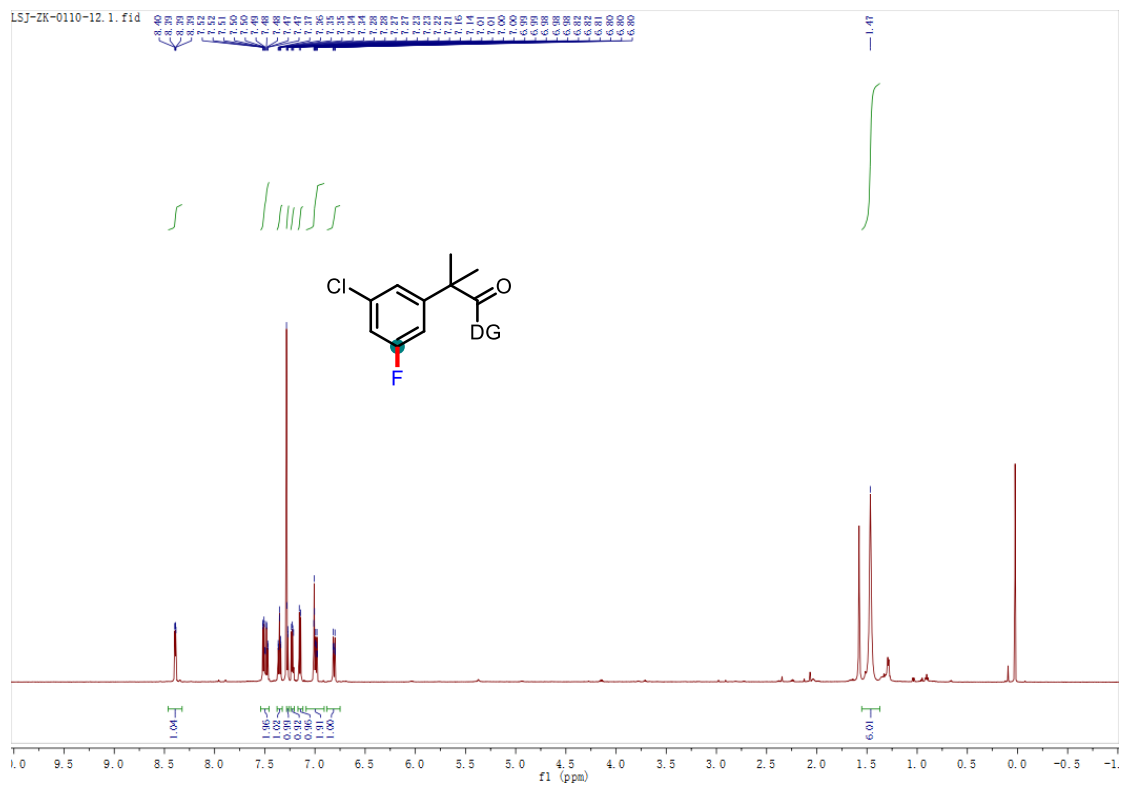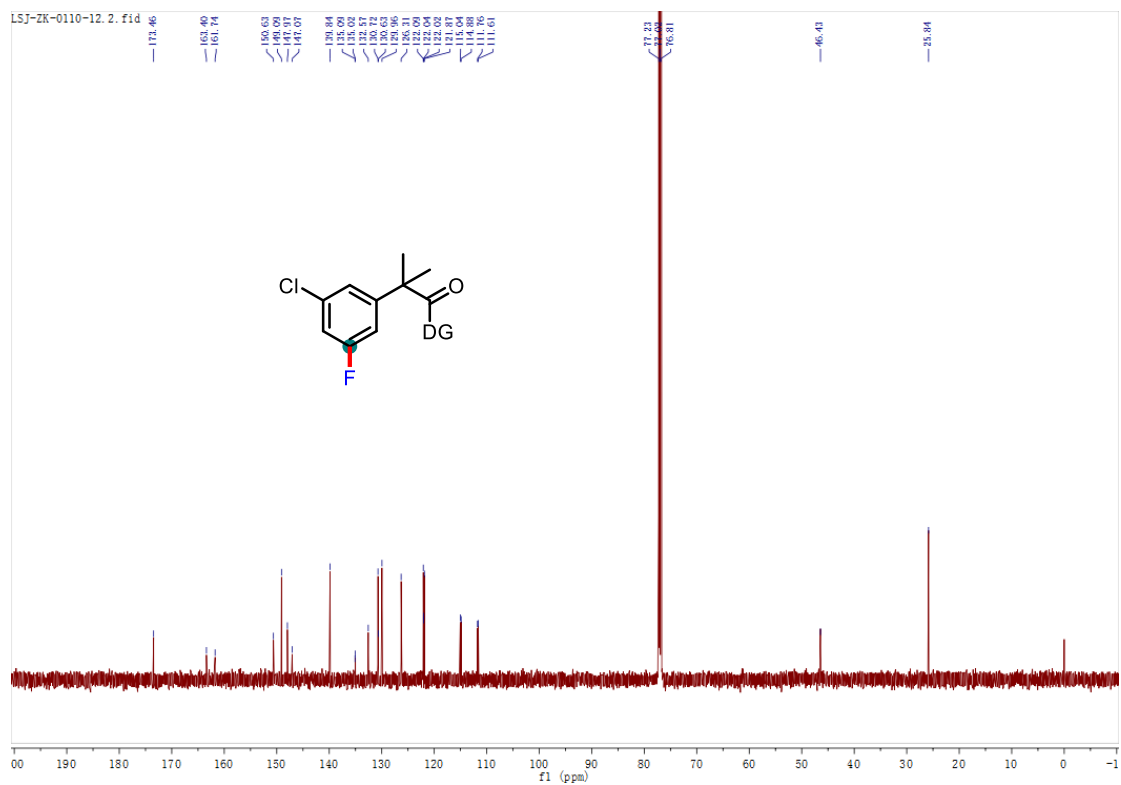

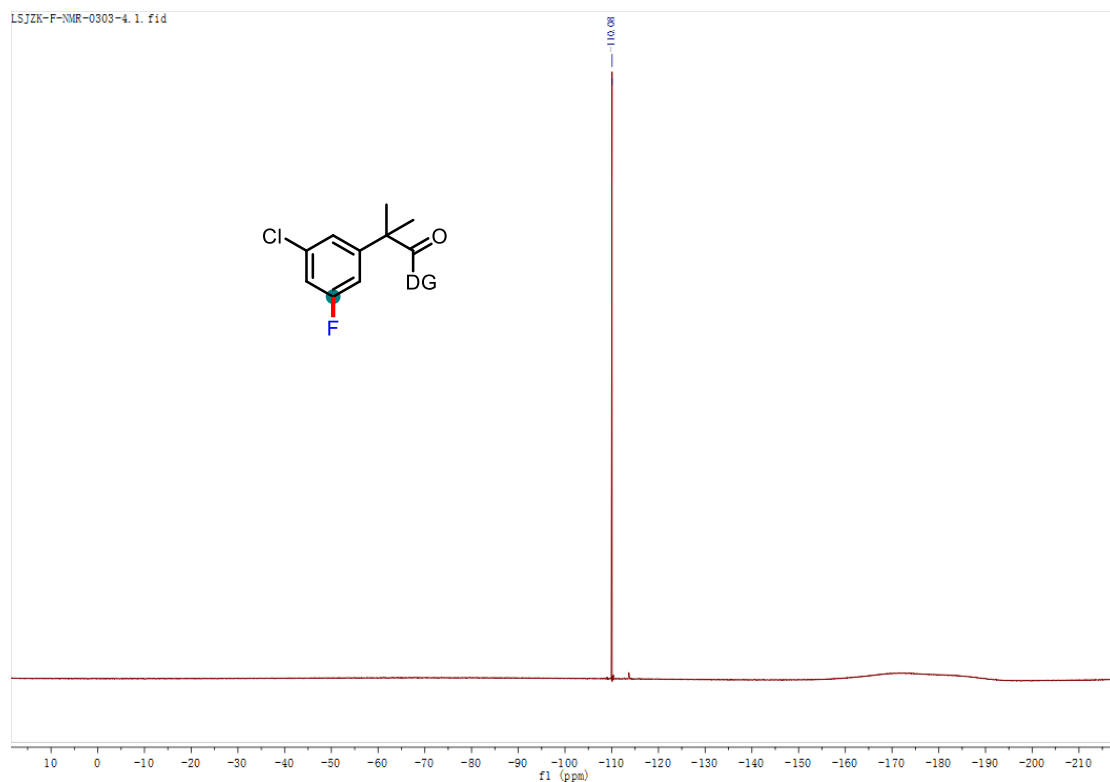

**<sup>19</sup>F NMR spectrum of 2c (565 MHz, CDCl<sub>3</sub>)**

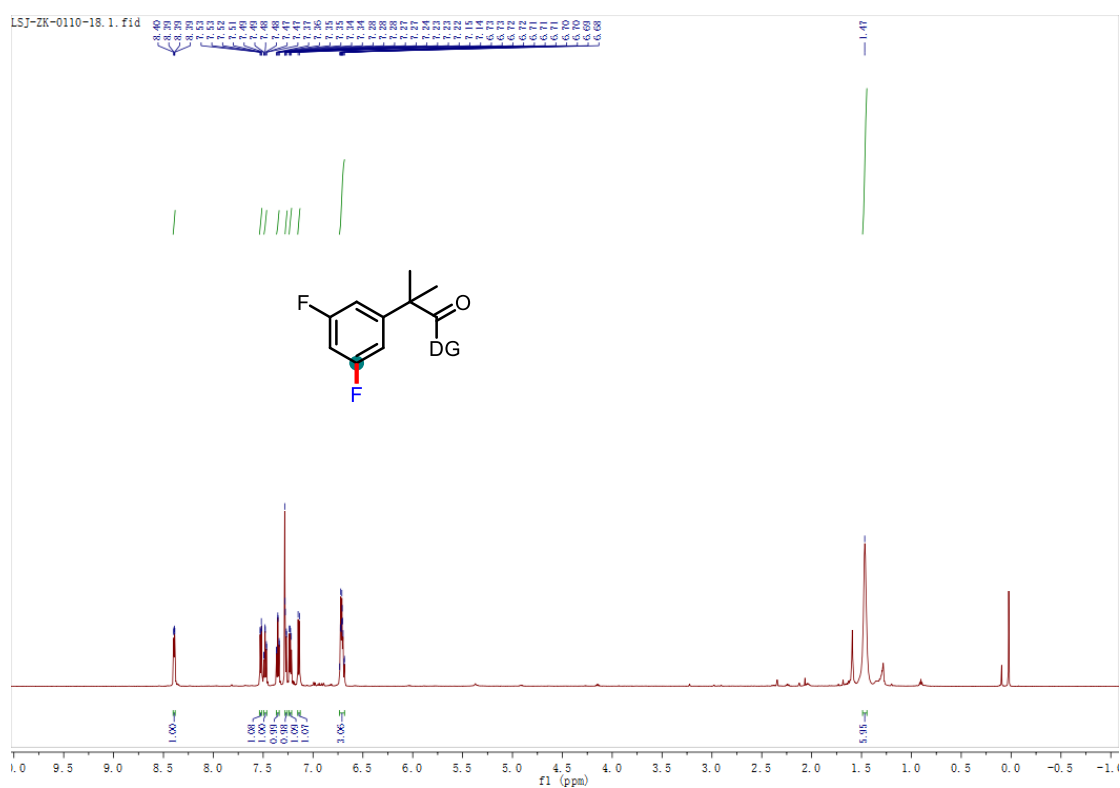

**<sup>1</sup>H NMR spectrum of 2d (600 MHz, CDCl<sub>3</sub>)**

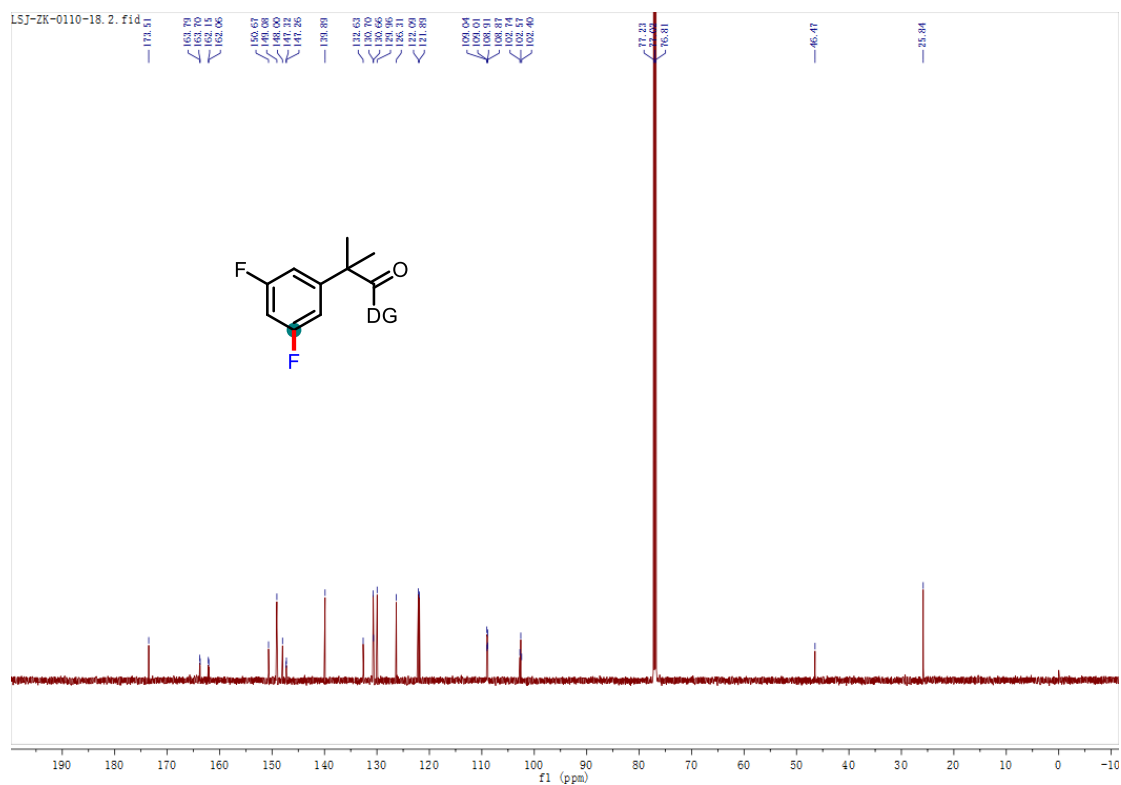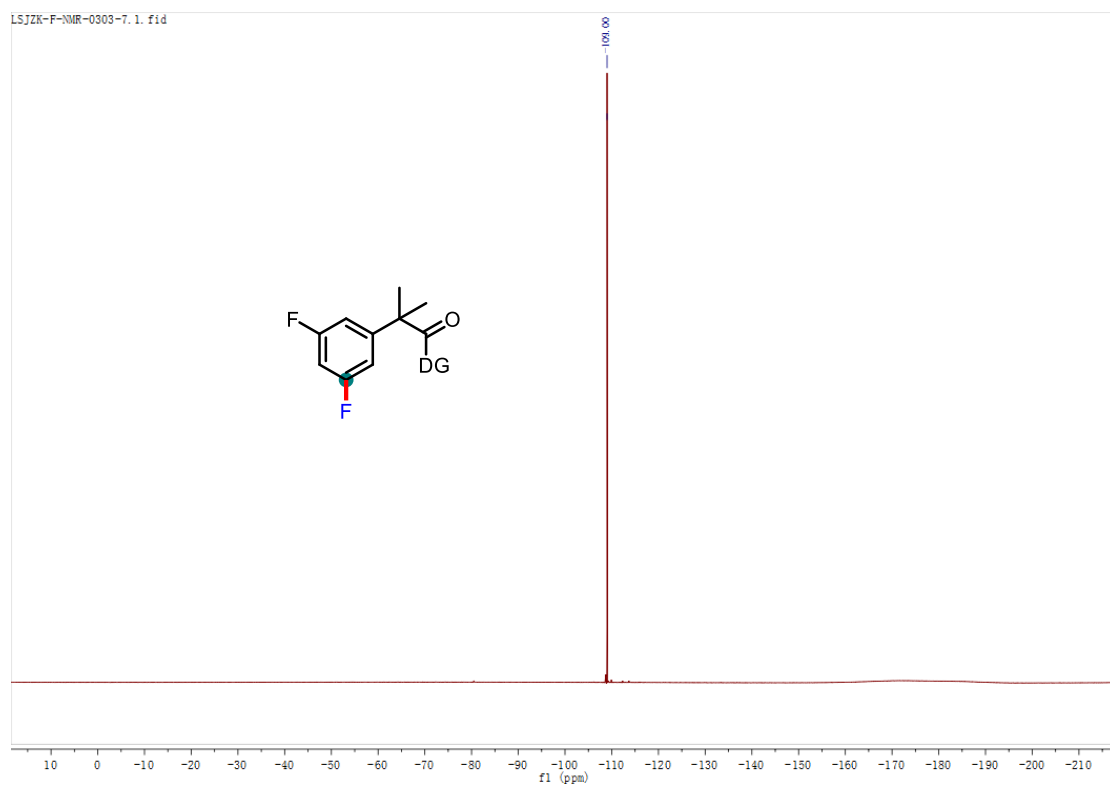

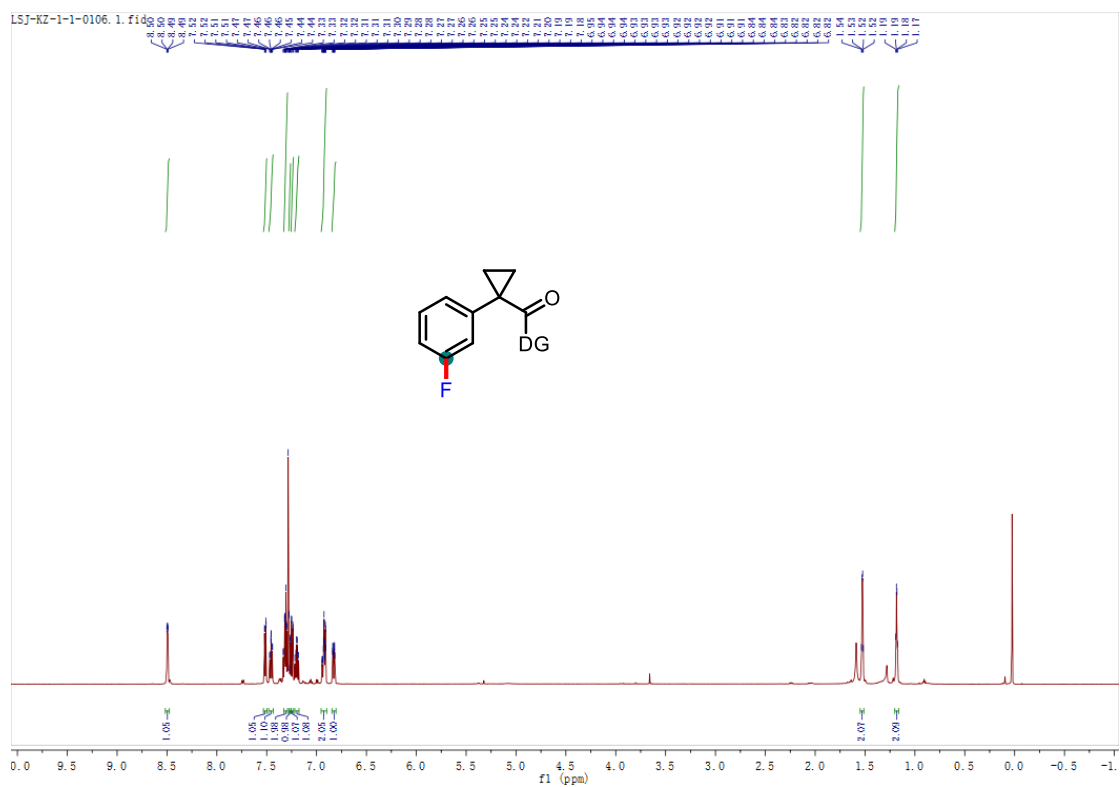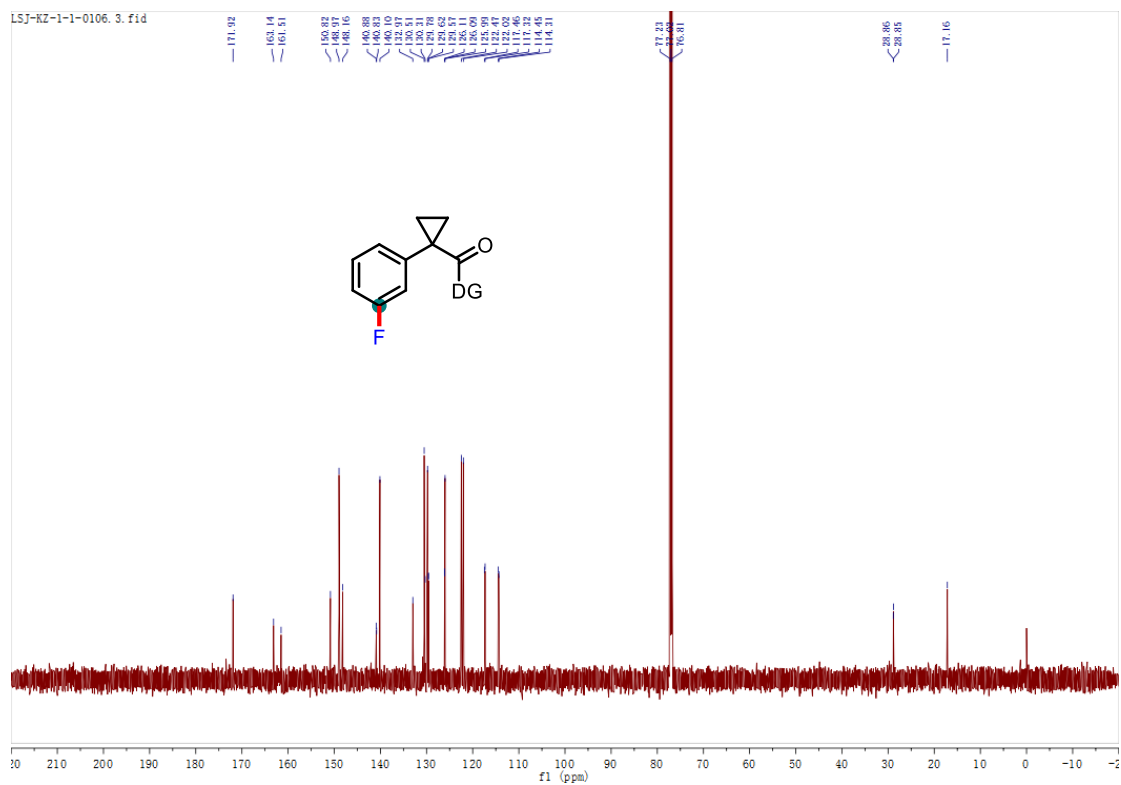



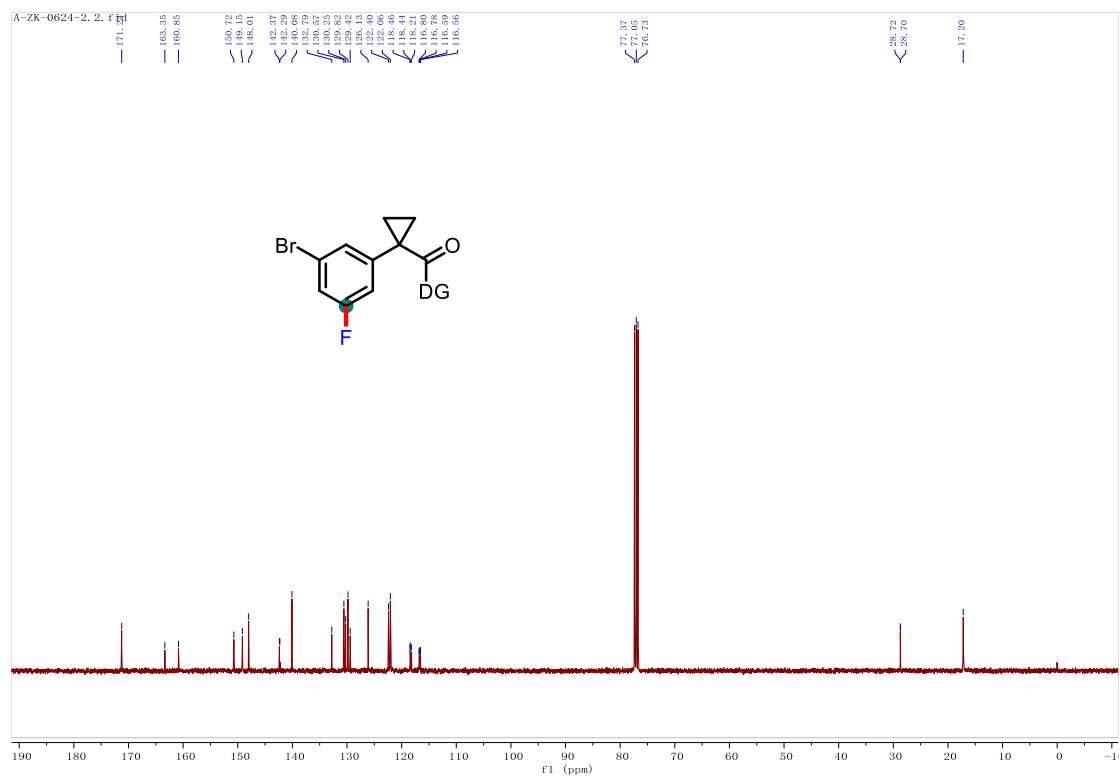

**<sup>13</sup>C NMR spectrum of 2f (101 MHz, CDCl<sub>3</sub>)**

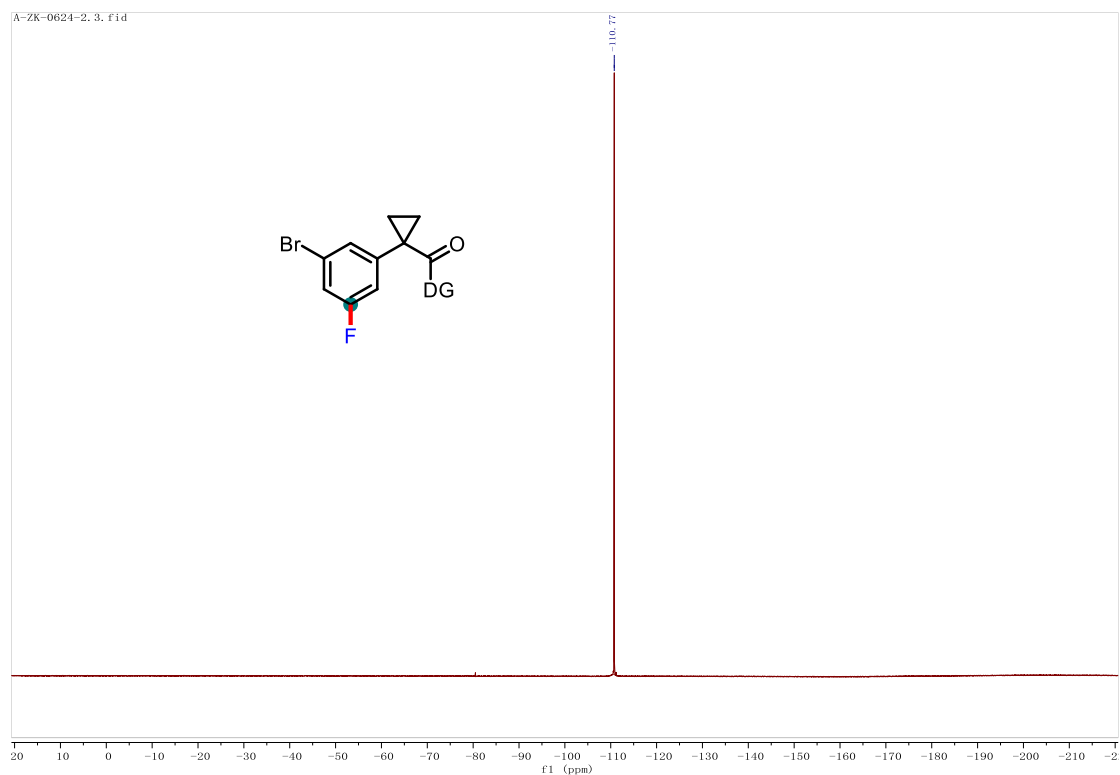

**<sup>19</sup>F NMR spectrum of 2f (376 MHz, CDCl<sub>3</sub>)**

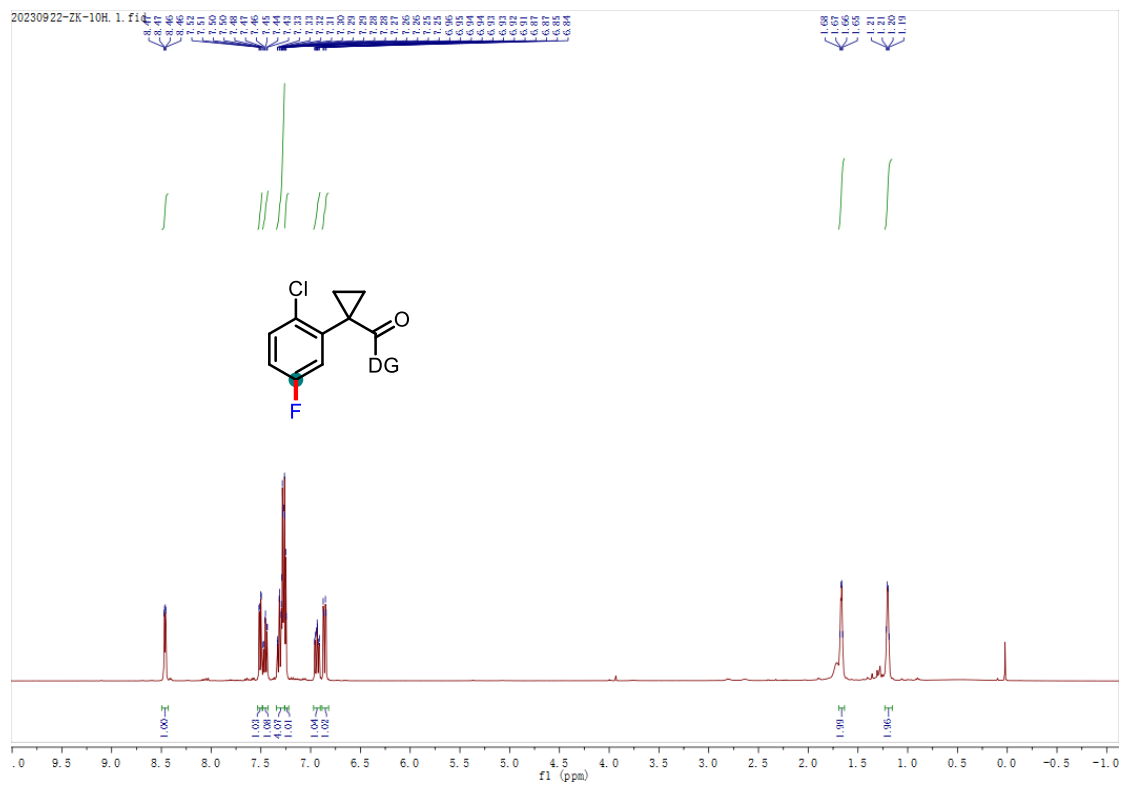

$^1\text{H}$  NMR spectrum of 2g (400 MHz,  $\text{CDCl}_3$ )

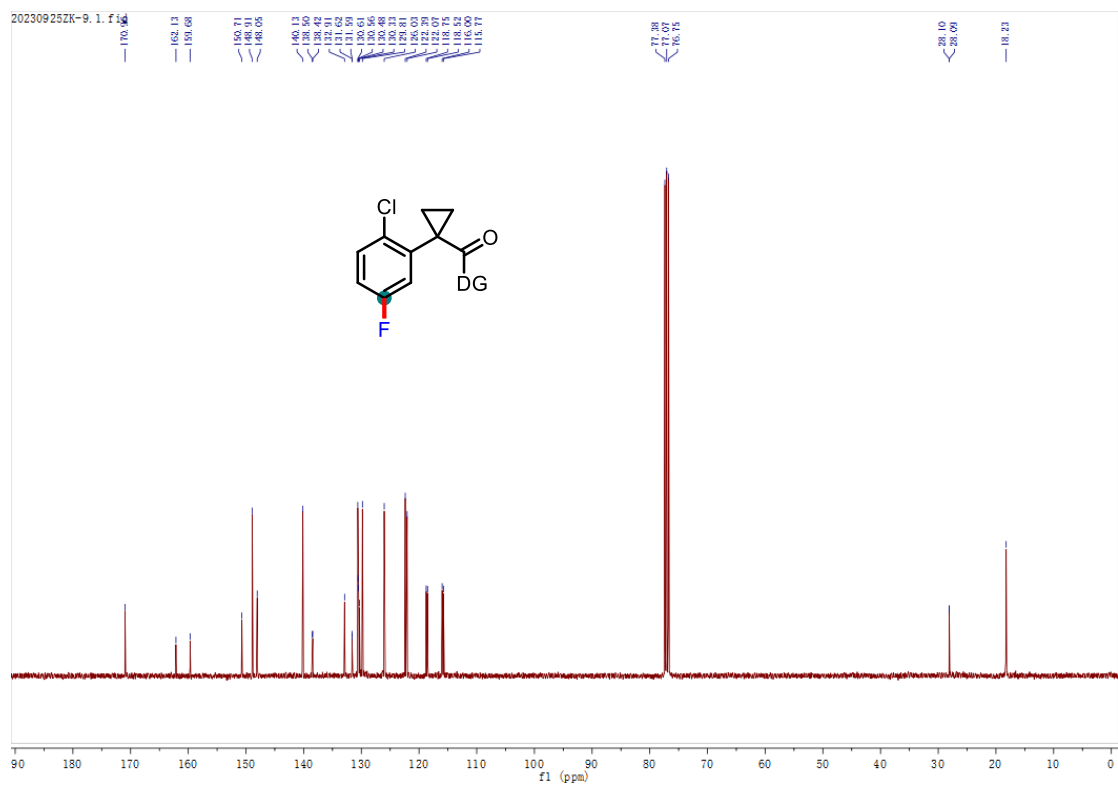

$^{13}\text{C}$  NMR spectrum of 2g (101 MHz,  $\text{CDCl}_3$ )



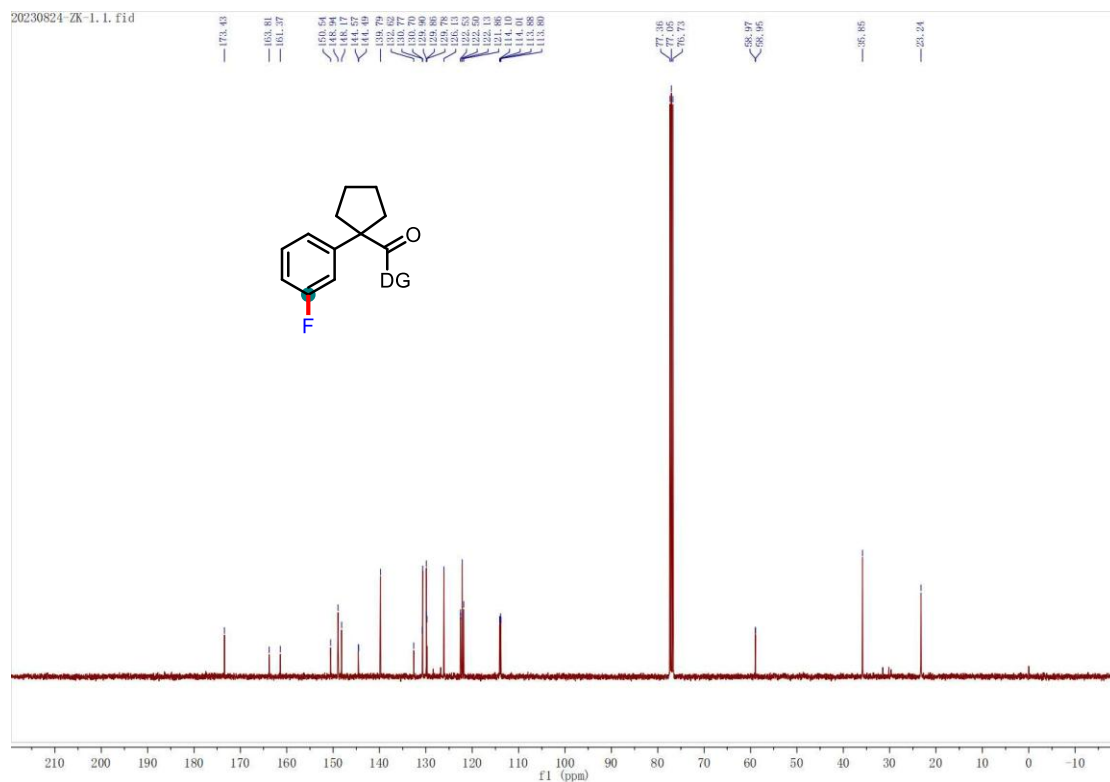

<sup>13</sup>C NMR spectrum of 2h (101 MHz, CDCl<sub>3</sub>)

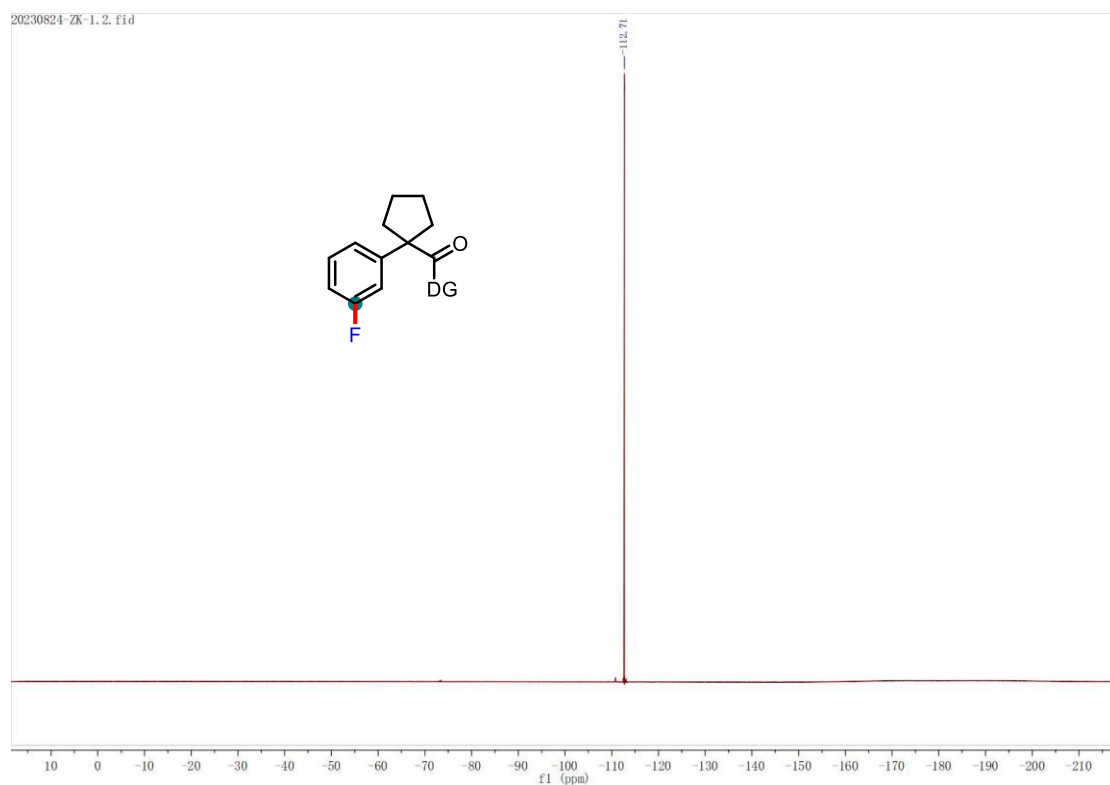

<sup>19</sup>F NMR spectrum of 2h (376 MHz, CDCl<sub>3</sub>)

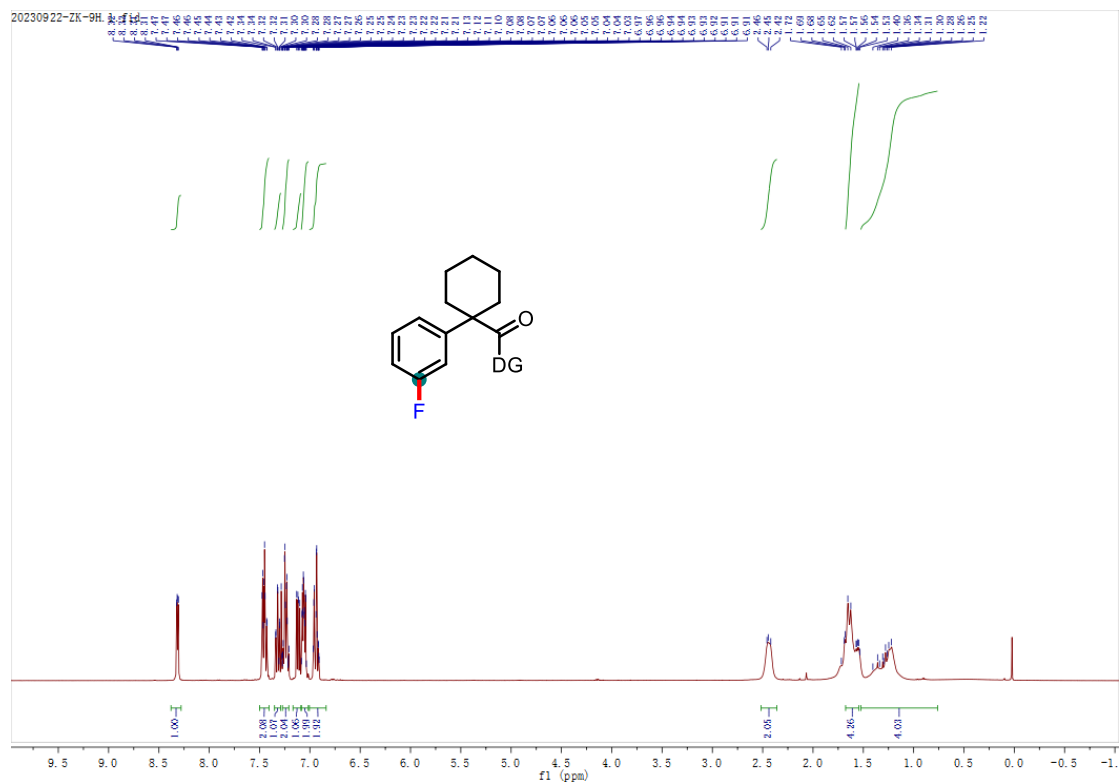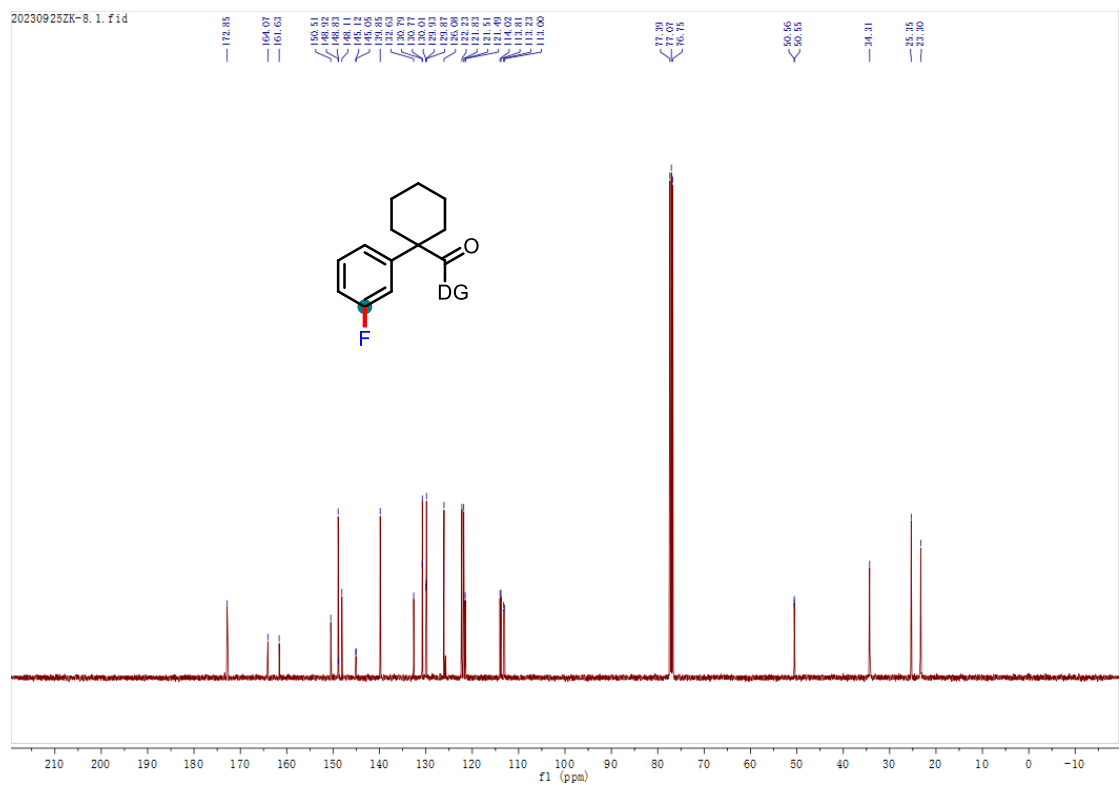



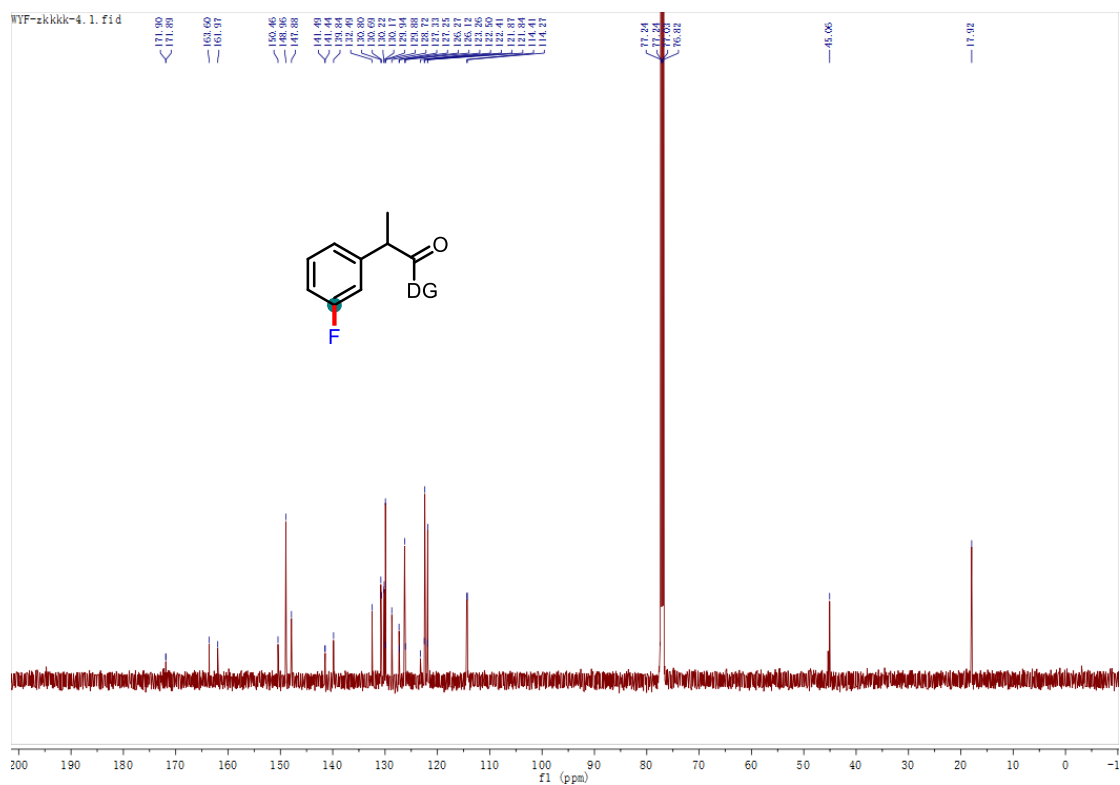

$^{13}\text{C}$  NMR spectrum of 2j (151 MHz,  $\text{CDCl}_3$ )

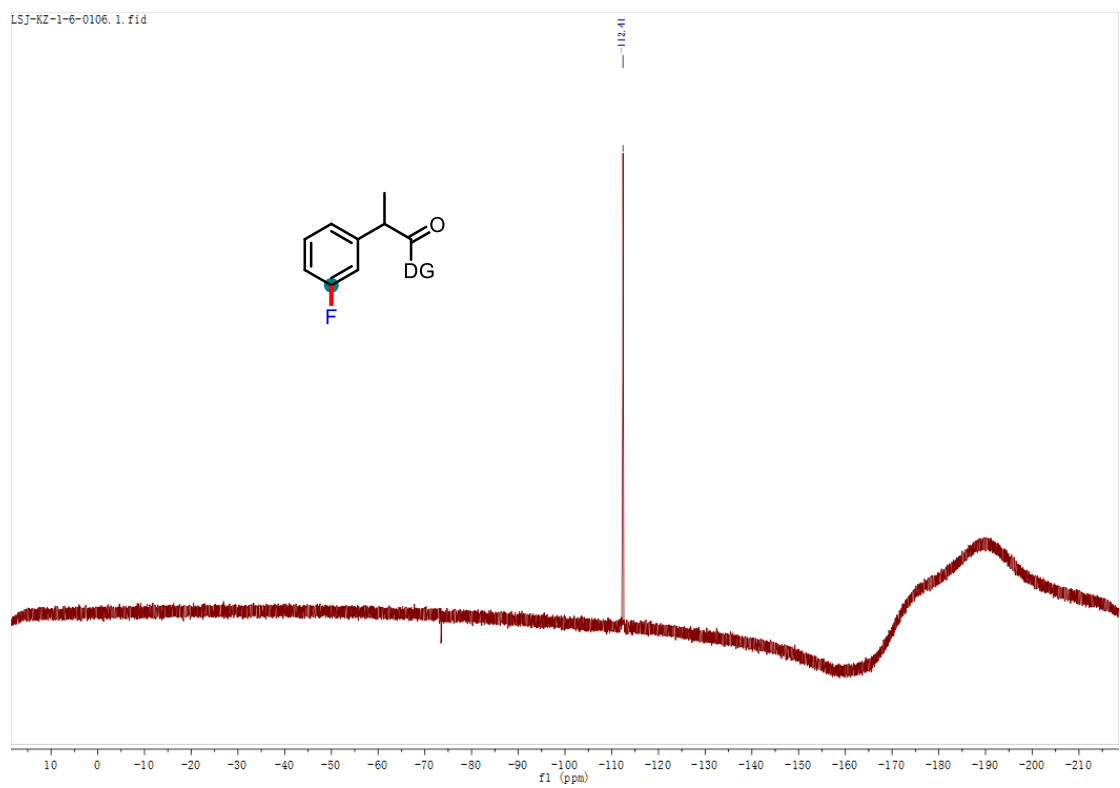

$^{19}\text{F}$  NMR spectrum of 2j (565 MHz,  $\text{CDCl}_3$ )

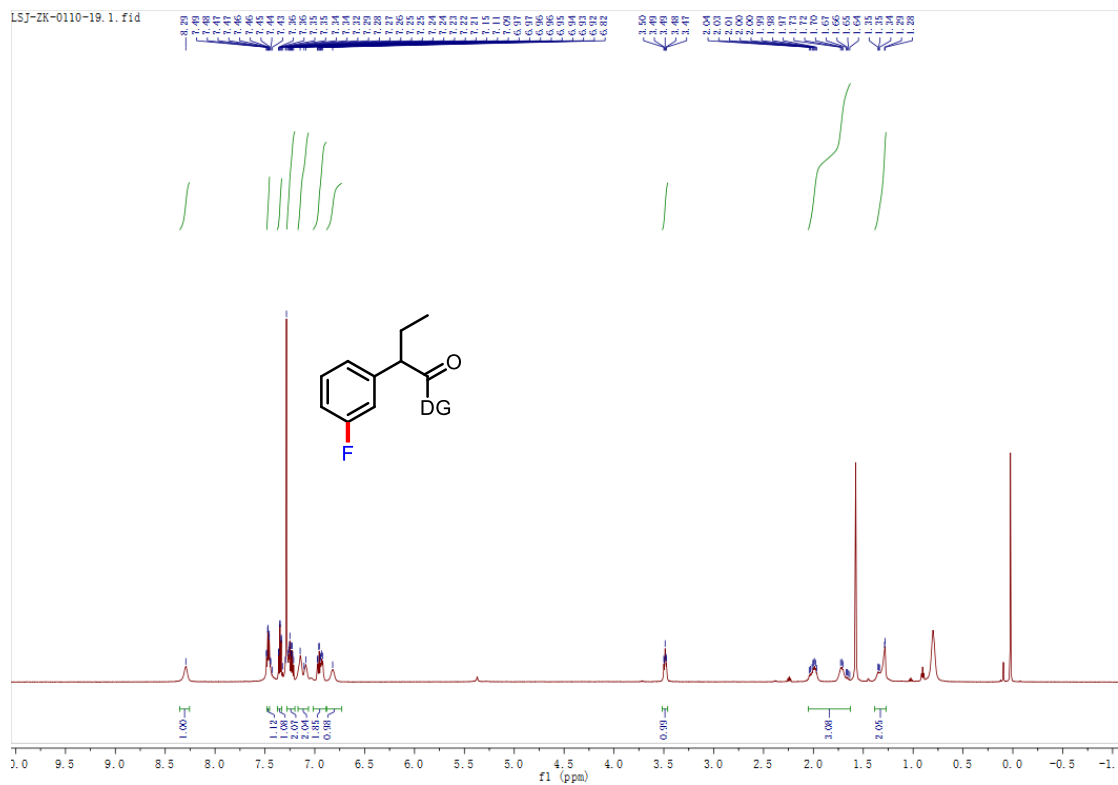

<sup>1</sup>H NMR spectrum of 2k (600 MHz, CDCl<sub>3</sub>)

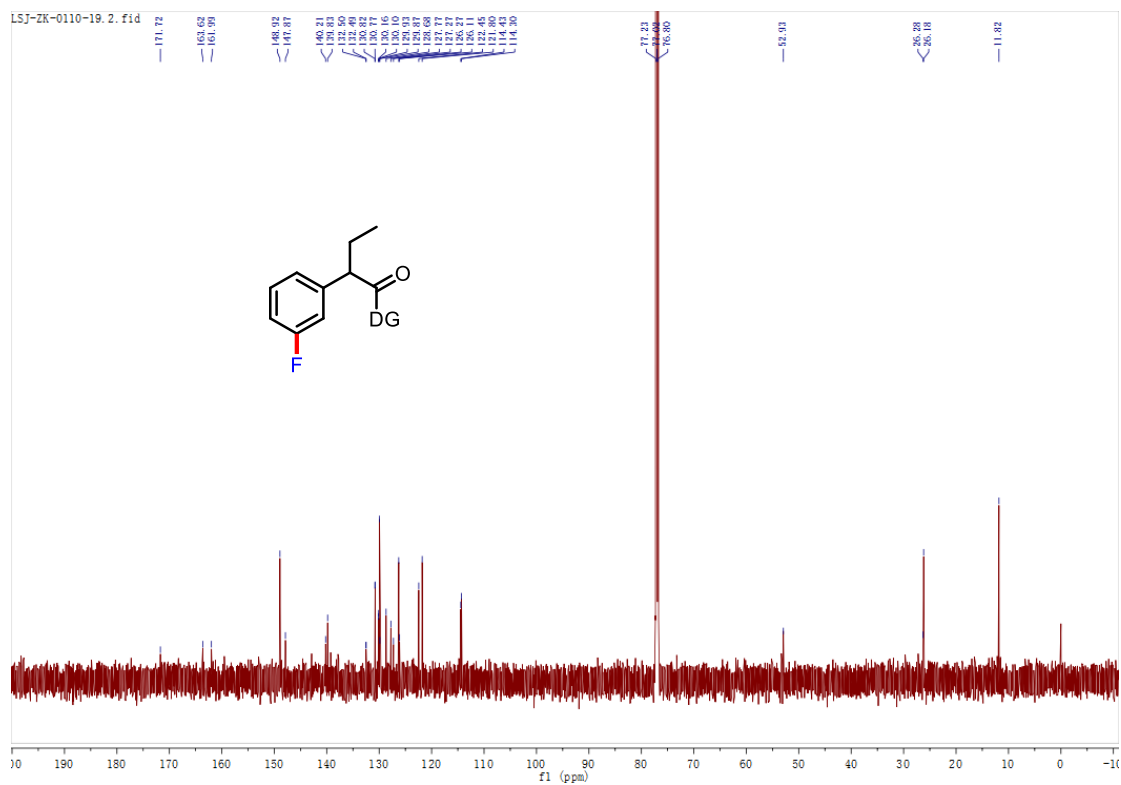

<sup>13</sup>C NMR spectrum of 2k (151 MHz, CDCl<sub>3</sub>)

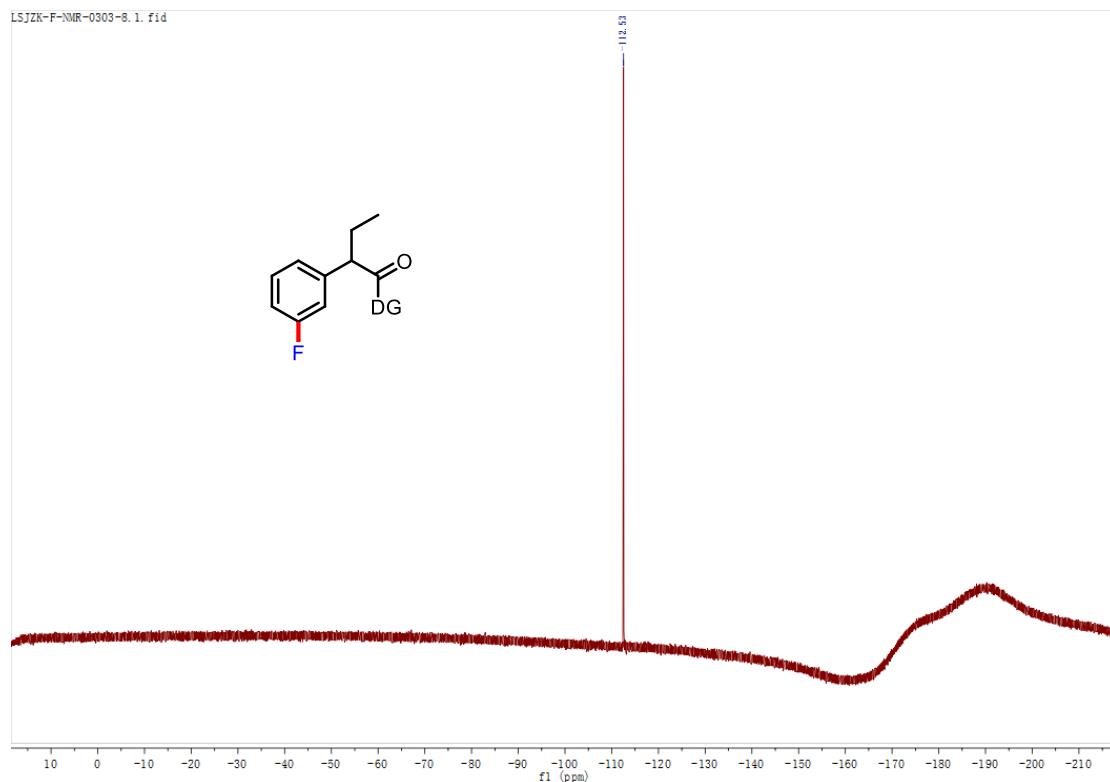

$^{19}\text{F}$  NMR spectrum of 2k (565 MHz,  $\text{CDCl}_3$ )

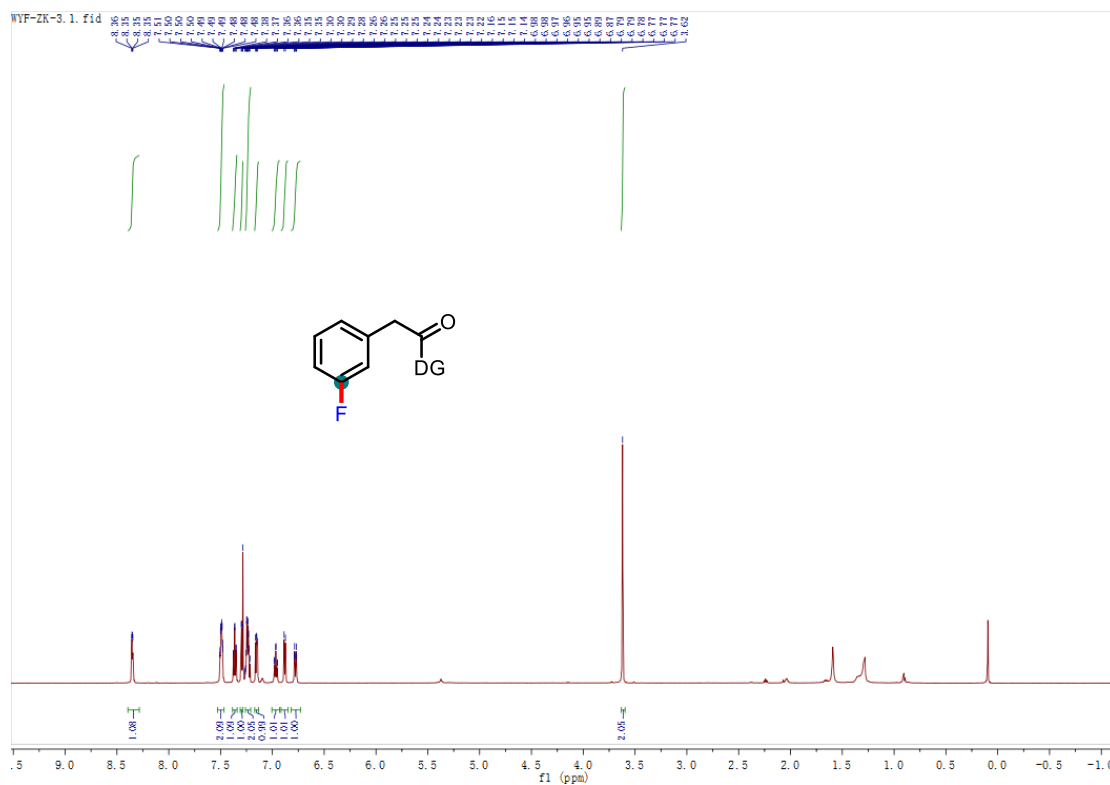

$^1\text{H}$  NMR spectrum of 2l (600 MHz,  $\text{CDCl}_3$ )

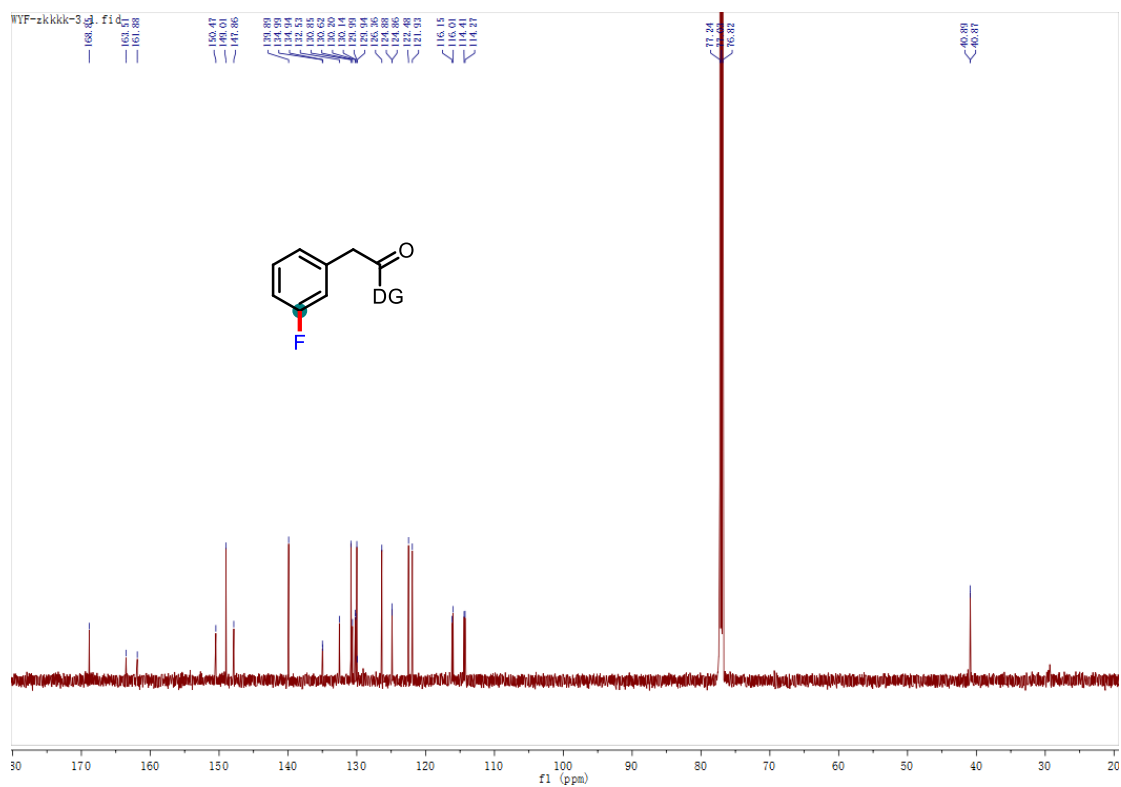

<sup>13</sup>C NMR spectrum of 2l (151 MHz, CDCl<sub>3</sub>)

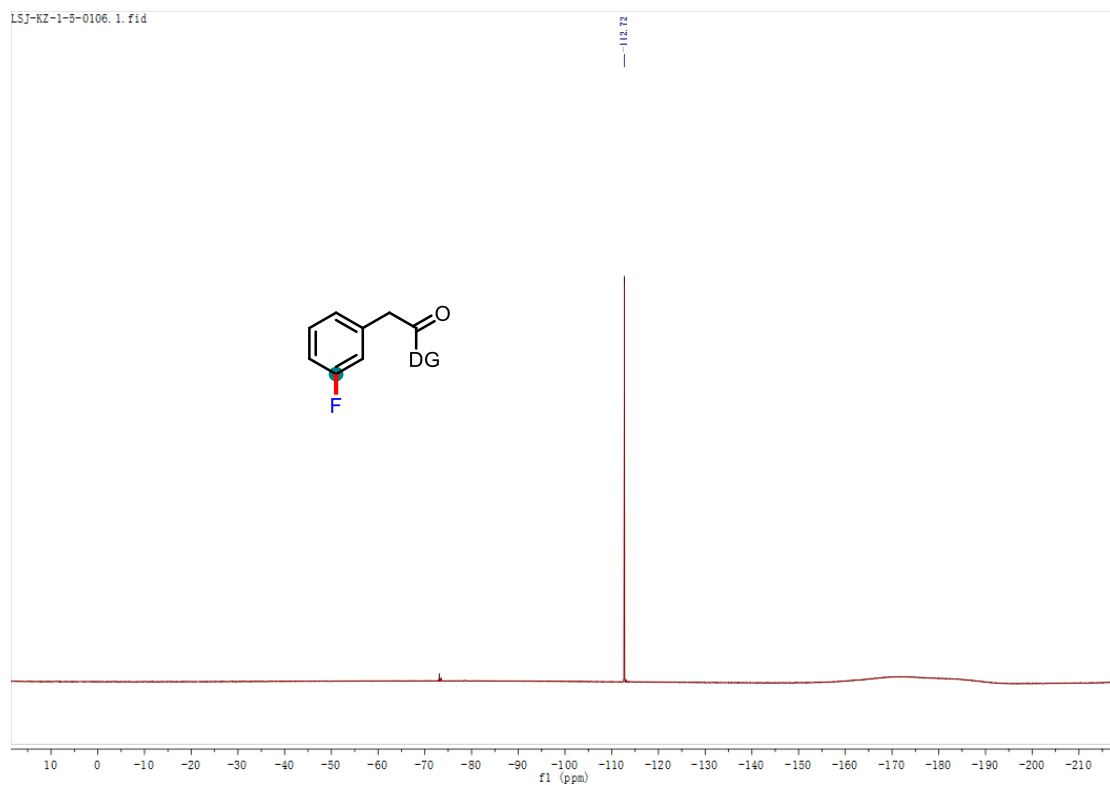

<sup>19</sup>F NMR spectrum of 2l (565 MHz, CDCl<sub>3</sub>)

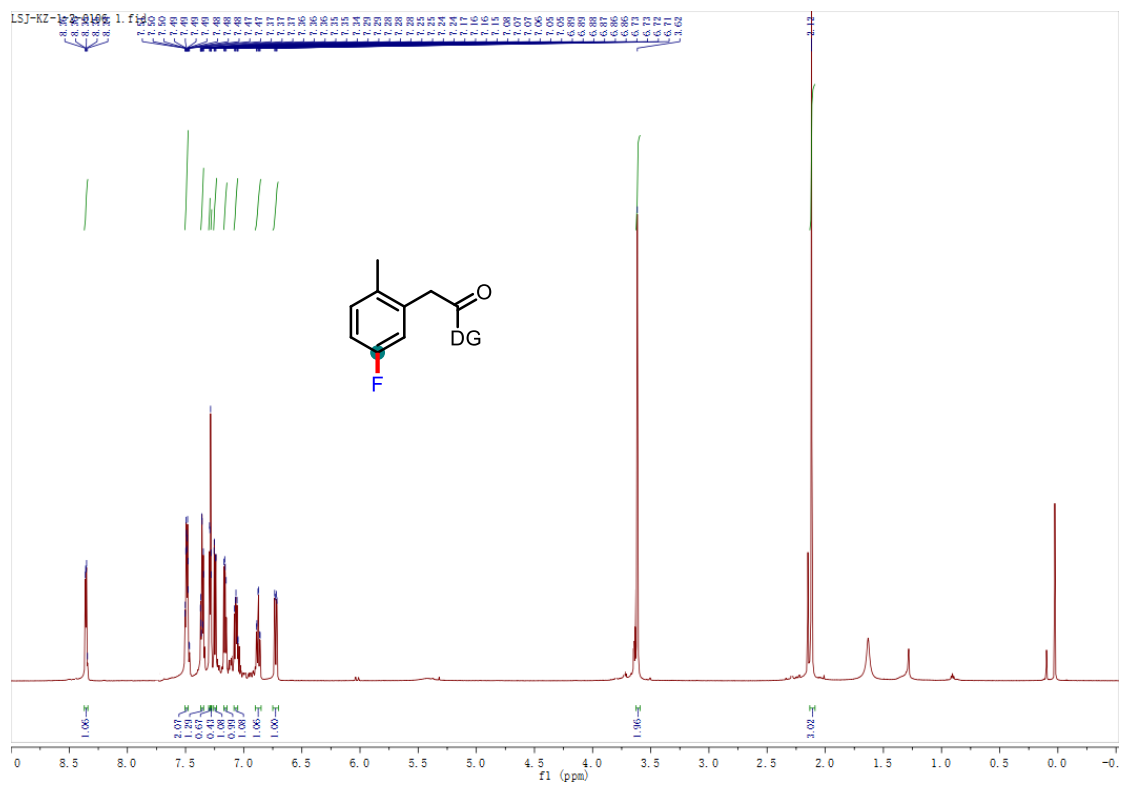

<sup>1</sup>H NMR spectrum of 2m (600 MHz, CDCl<sub>3</sub>)

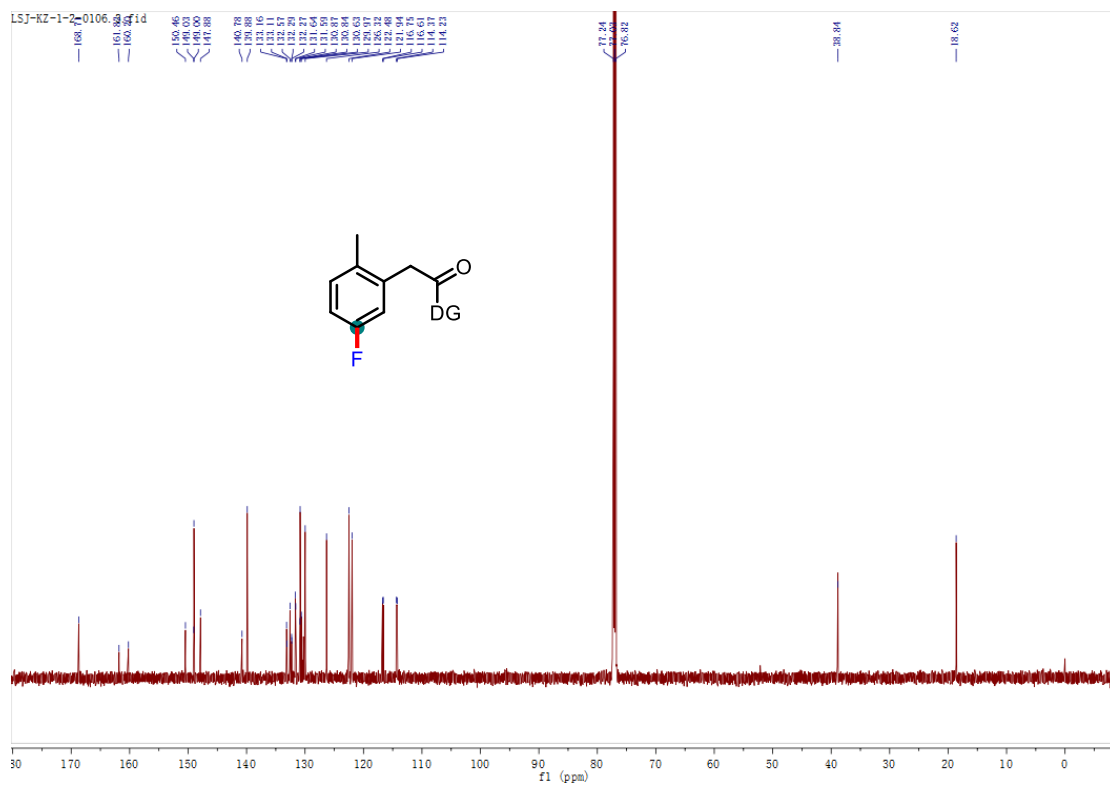

<sup>13</sup>C NMR spectrum of 2m (151 MHz, CDCl<sub>3</sub>)

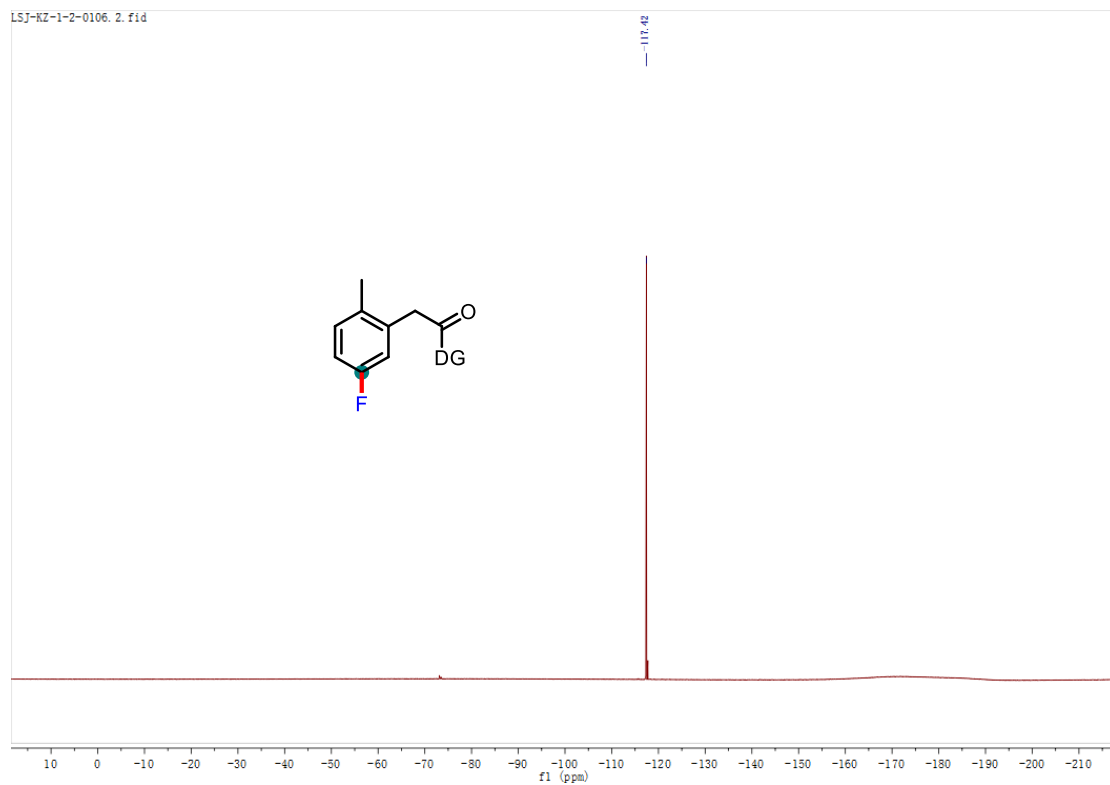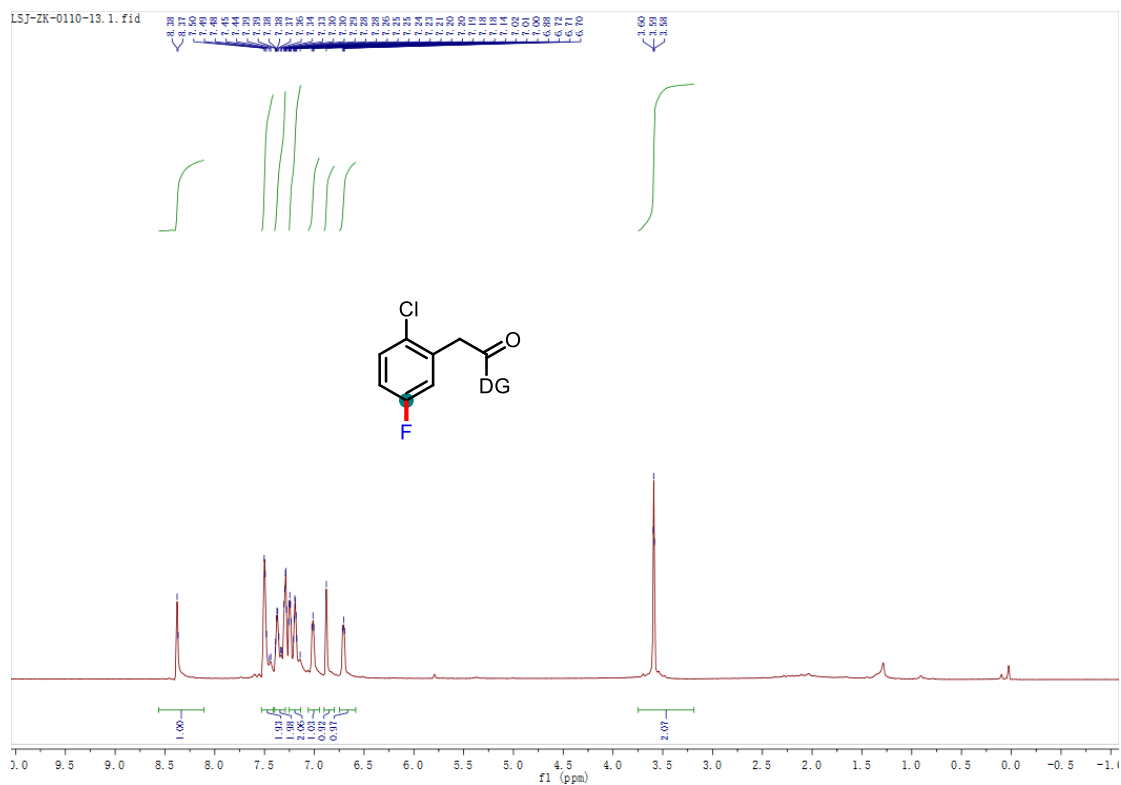

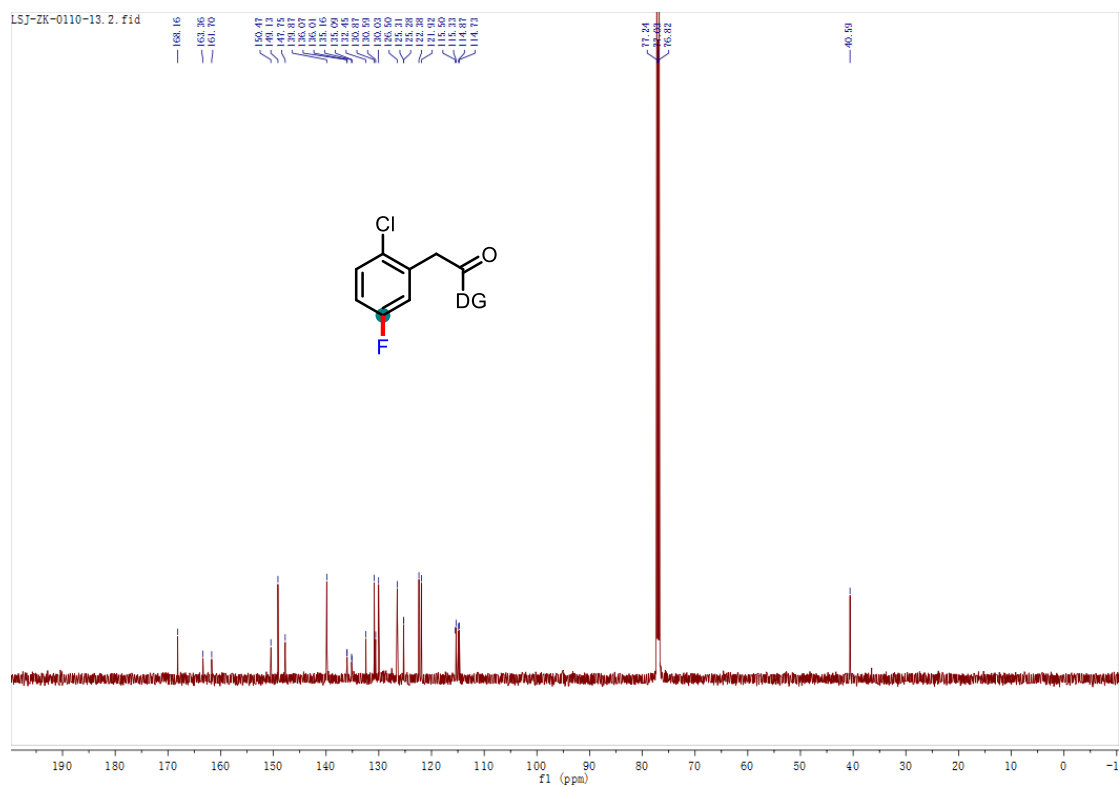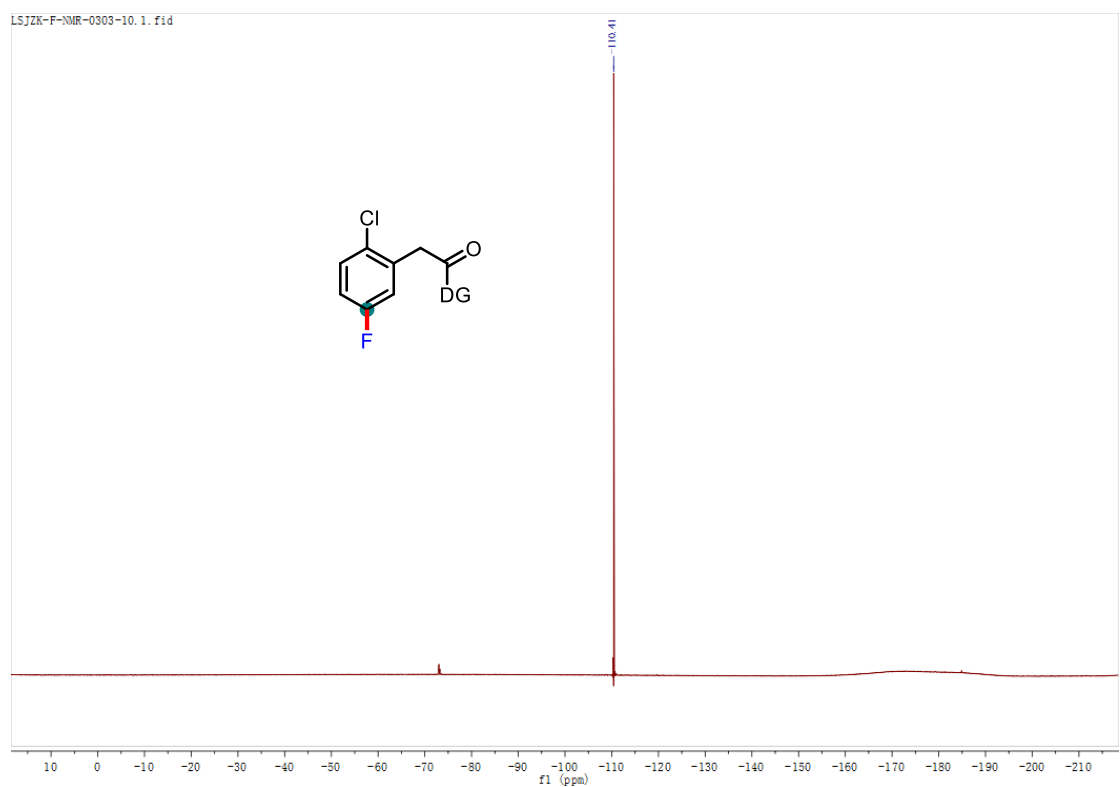

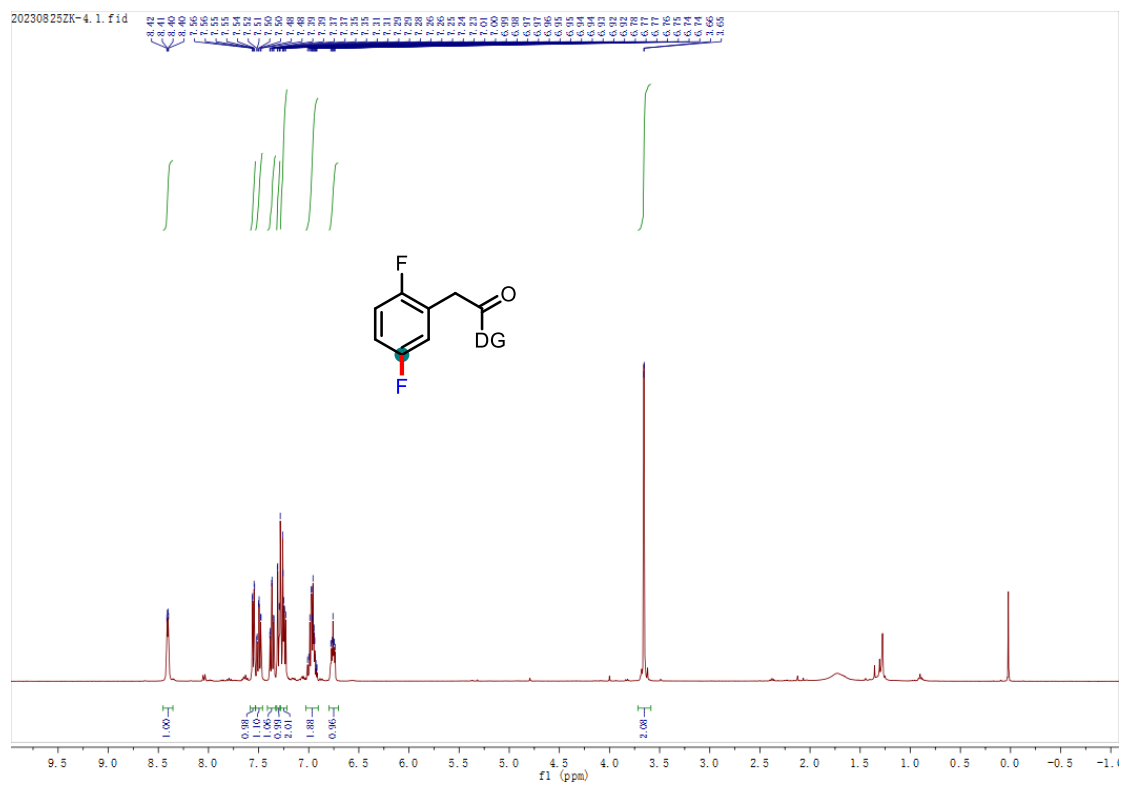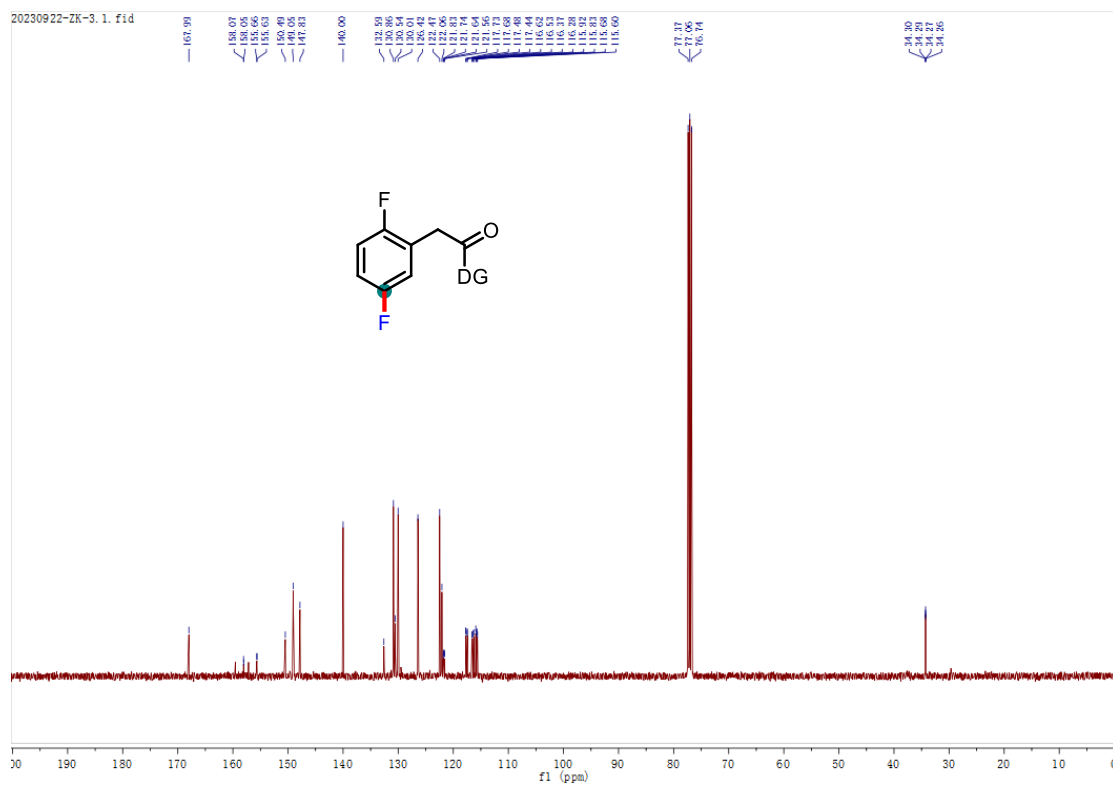

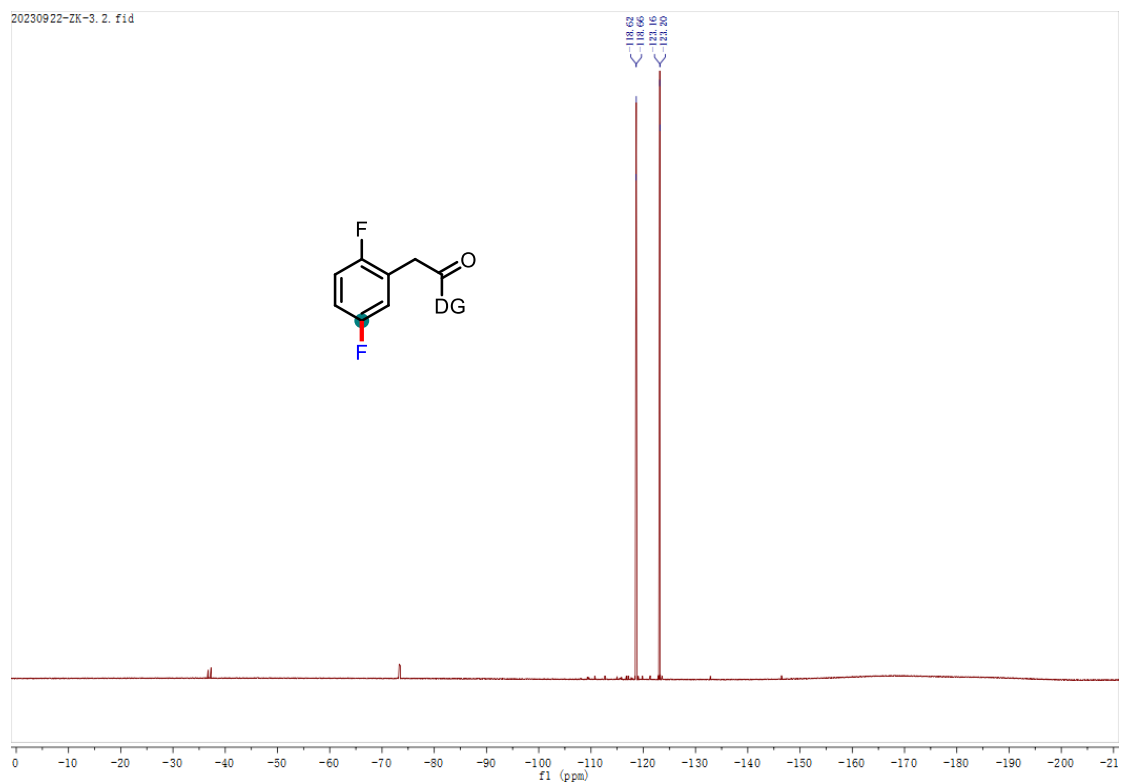

<sup>19</sup>F NMR spectrum of 2o (376 MHz, CDCl<sub>3</sub>)

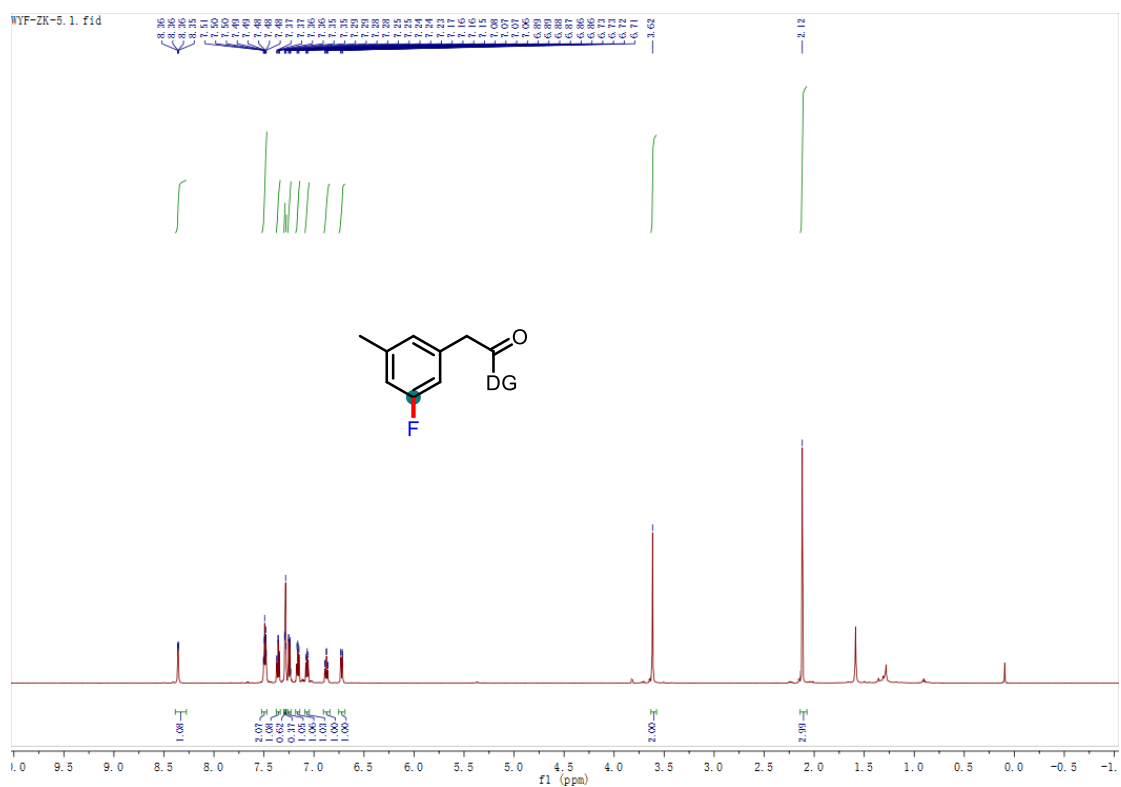

<sup>1</sup>H NMR spectrum of 2p (600 MHz, CDCl<sub>3</sub>)

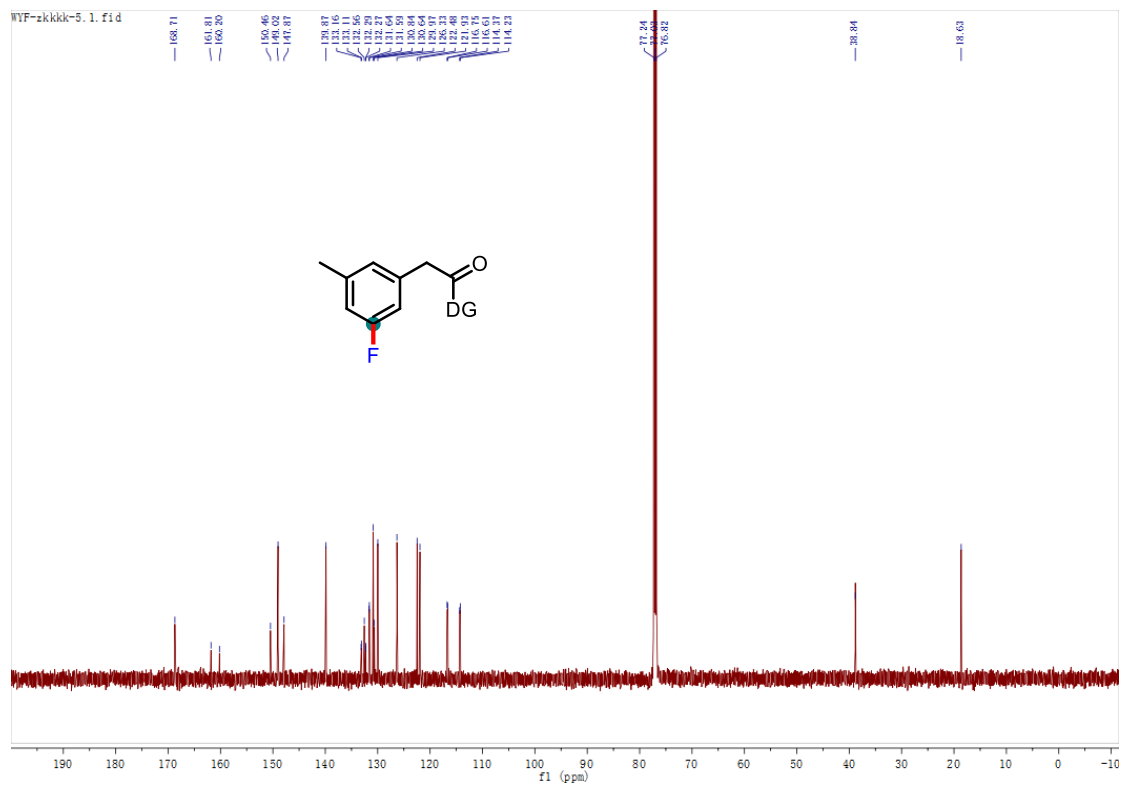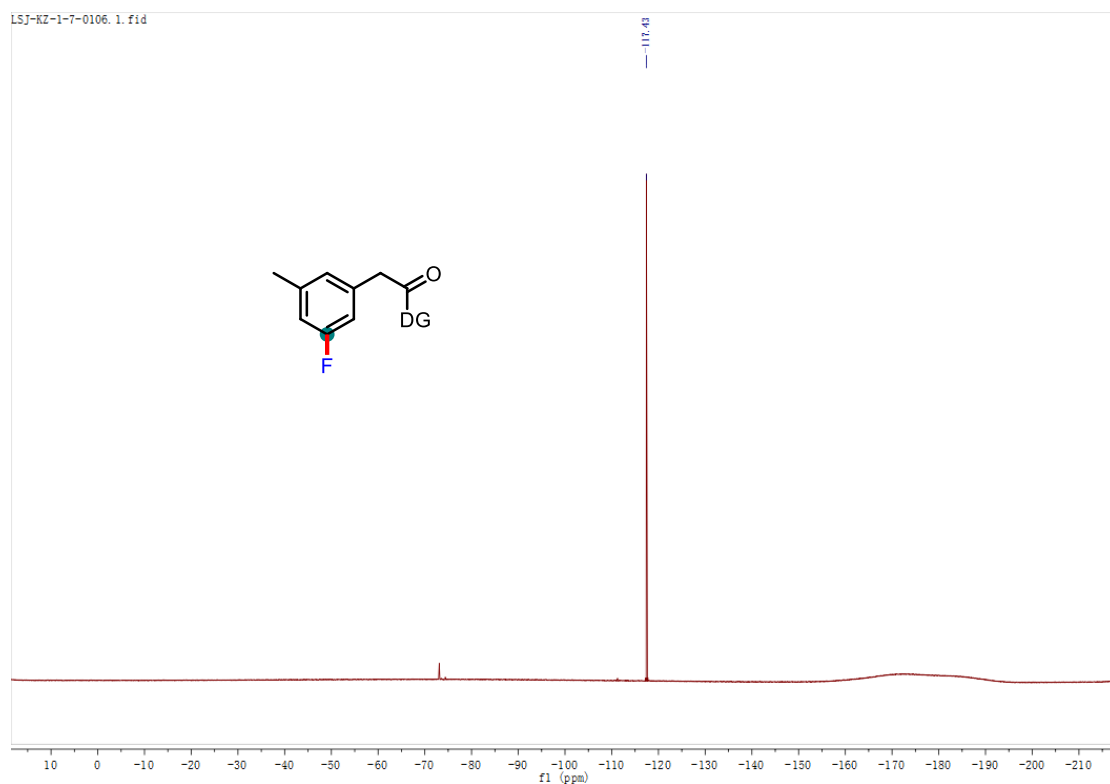



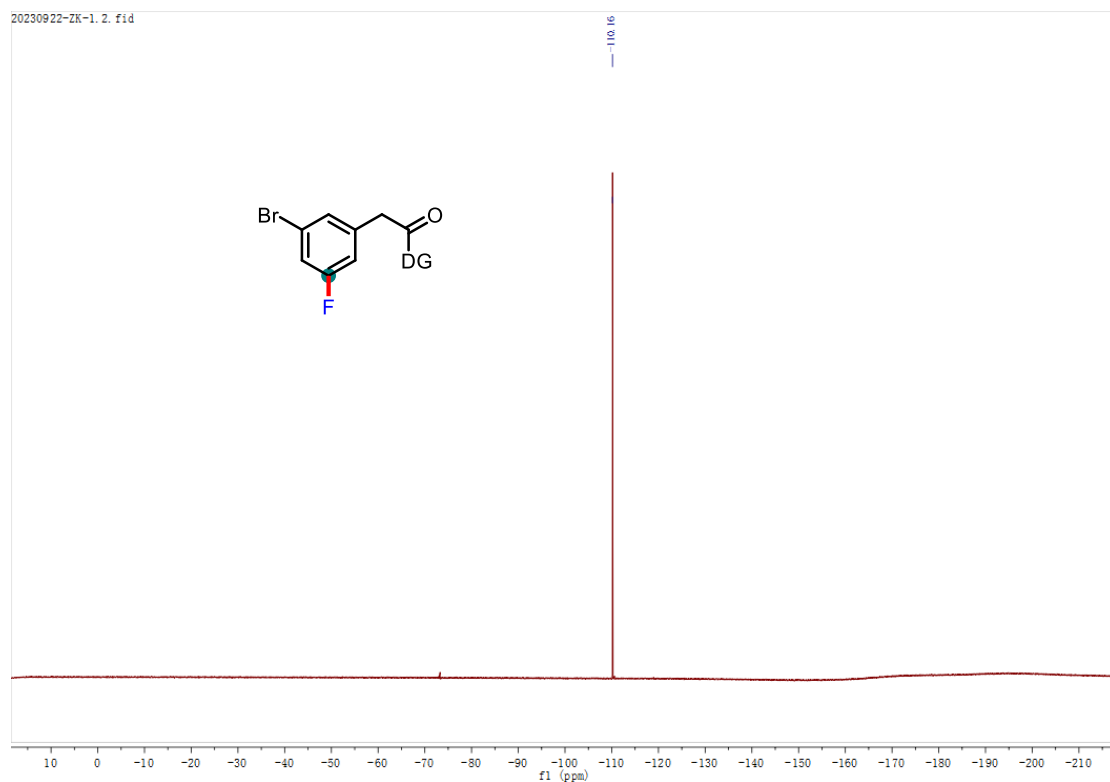

**<sup>19</sup>F NMR spectrum of 2q (376 MHz, CDCl<sub>3</sub>)**

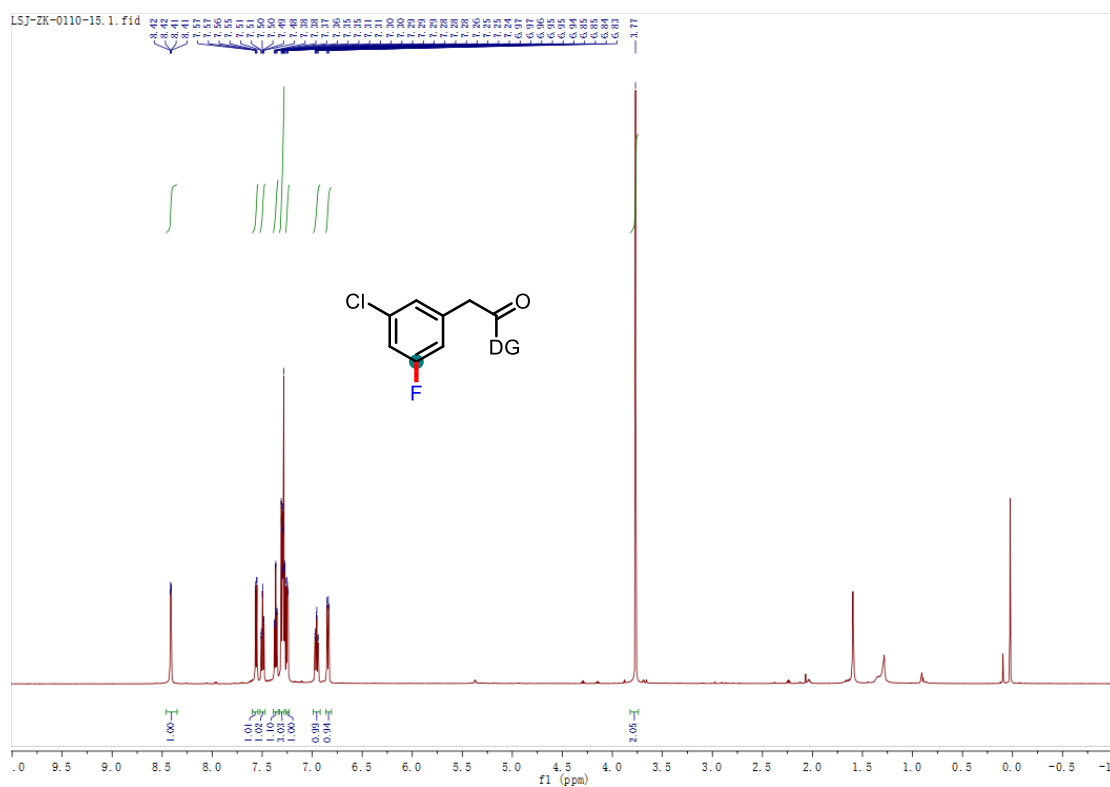

**<sup>1</sup>H NMR spectrum of 2r (600 MHz, CDCl<sub>3</sub>)**

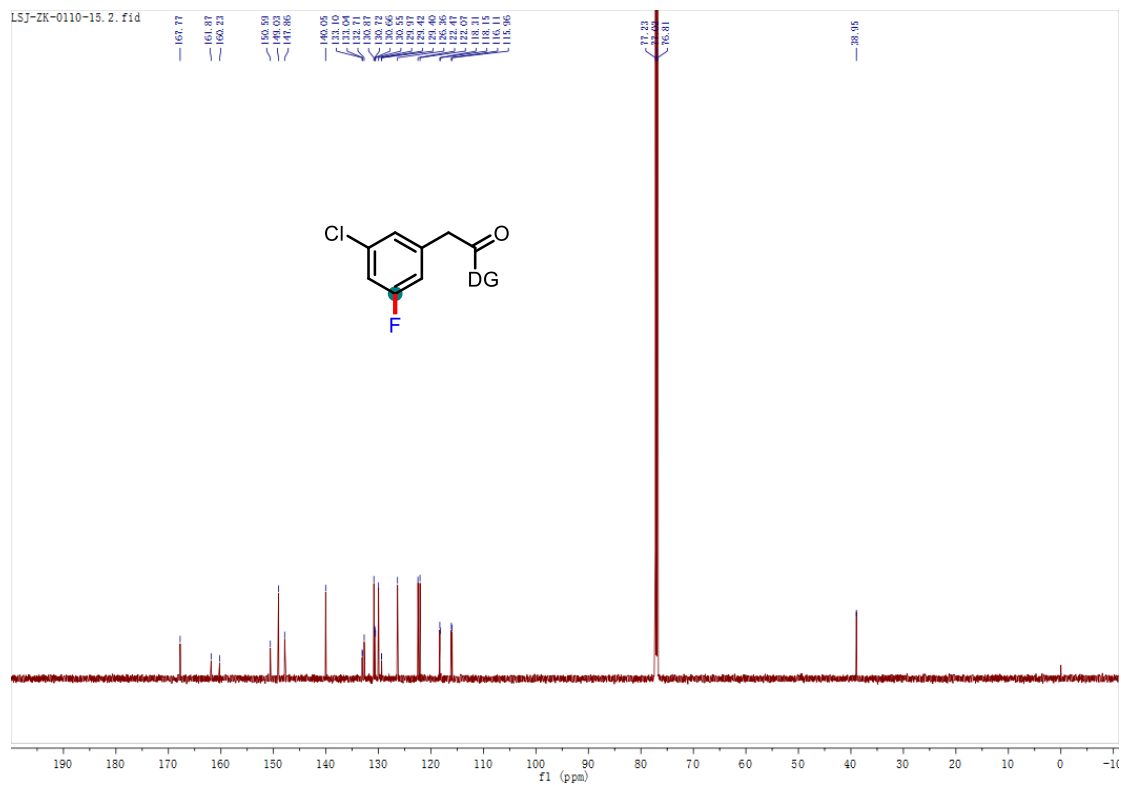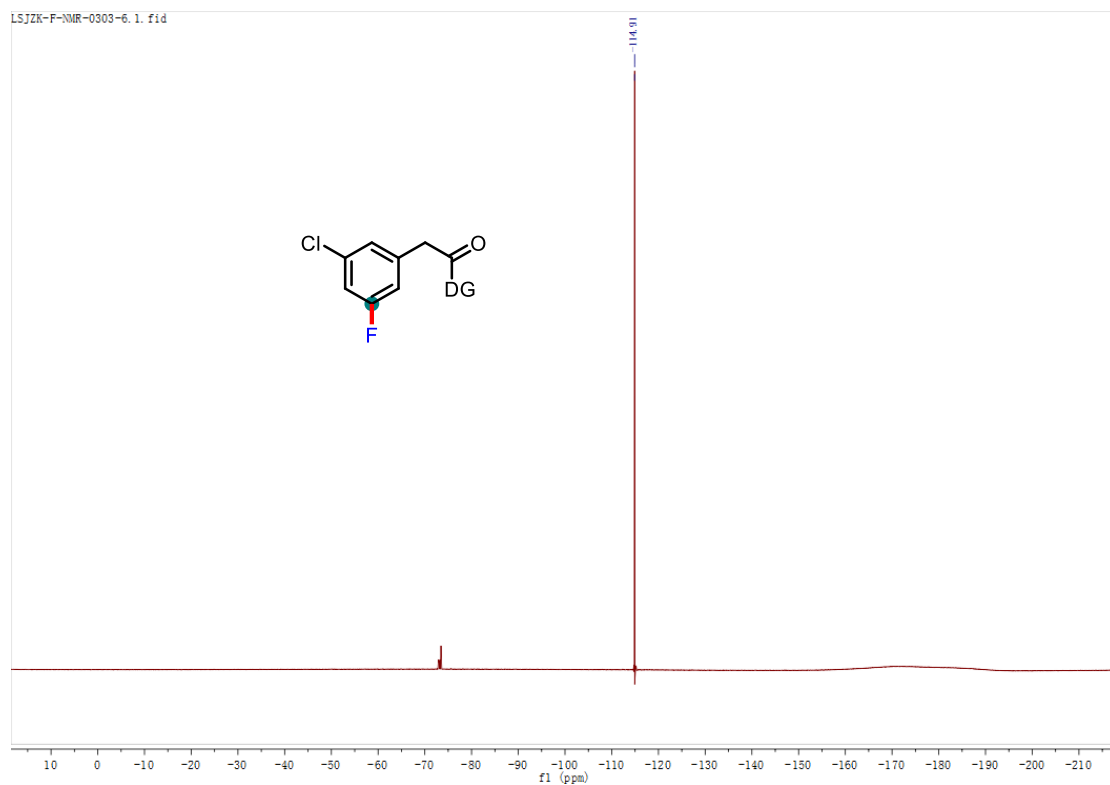



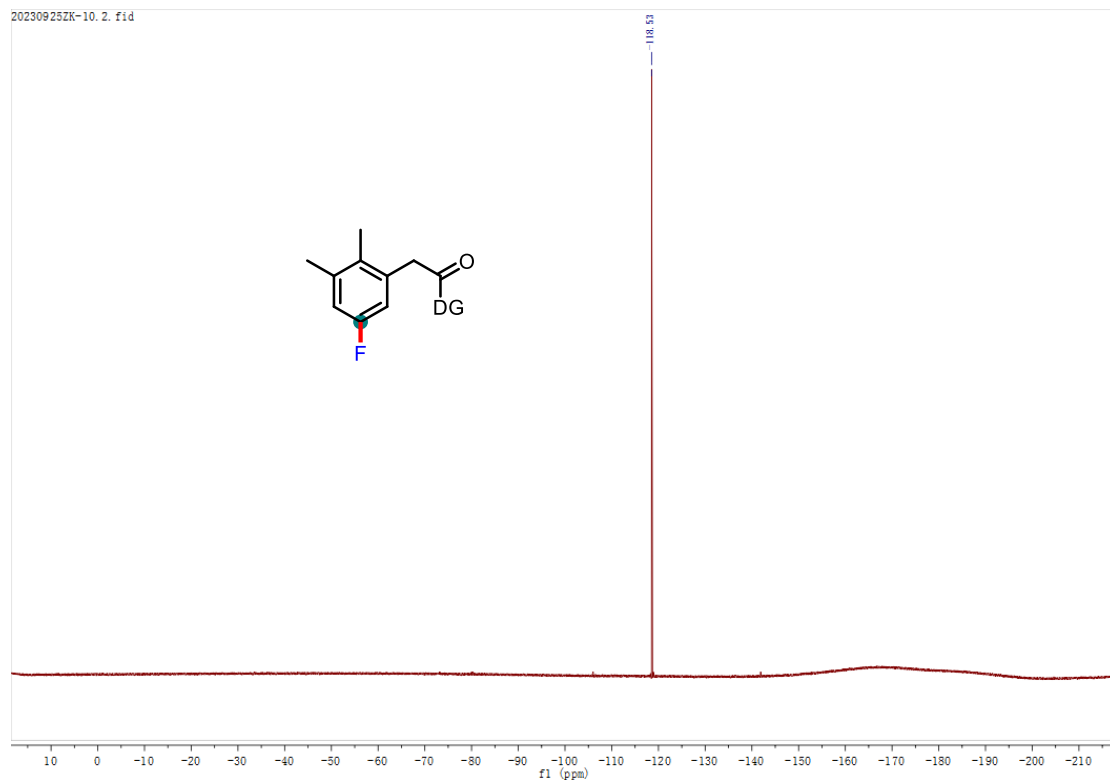

**$^{19}\text{F}$  NMR spectrum of 2s (376 MHz,  $\text{CDCl}_3$ )**

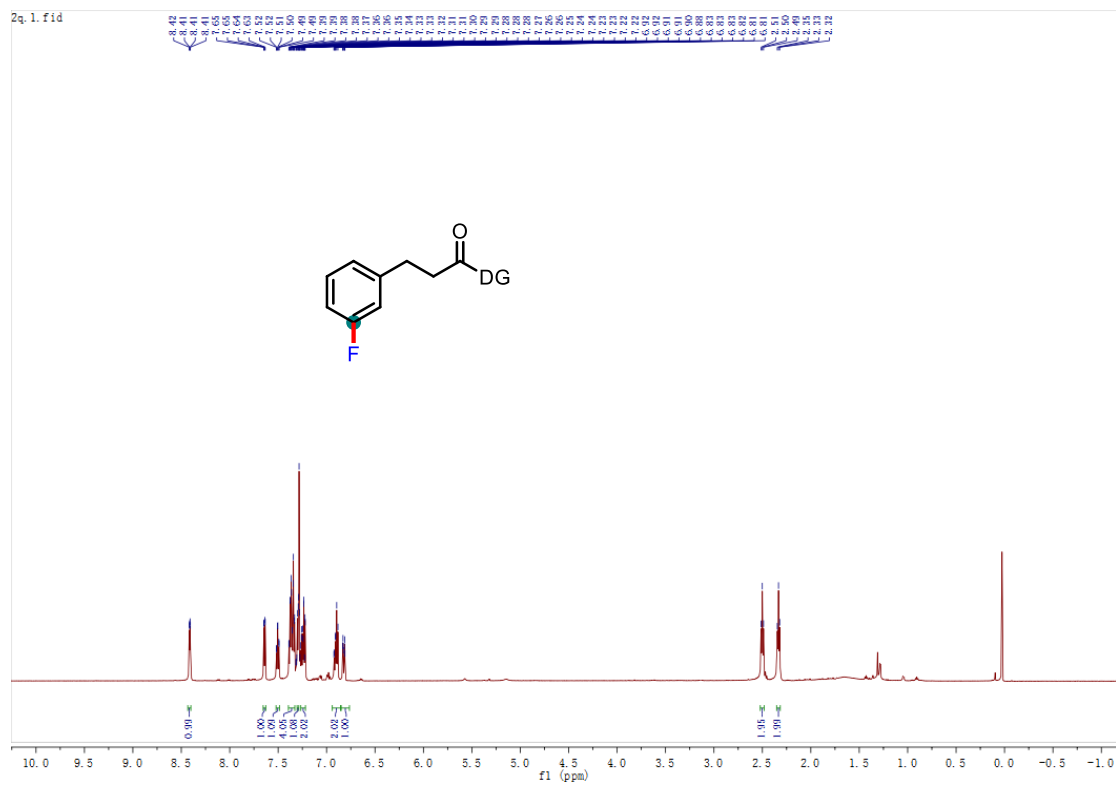

**$^1\text{H}$  NMR spectrum of 4a (600 MHz,  $\text{CDCl}_3$ )**





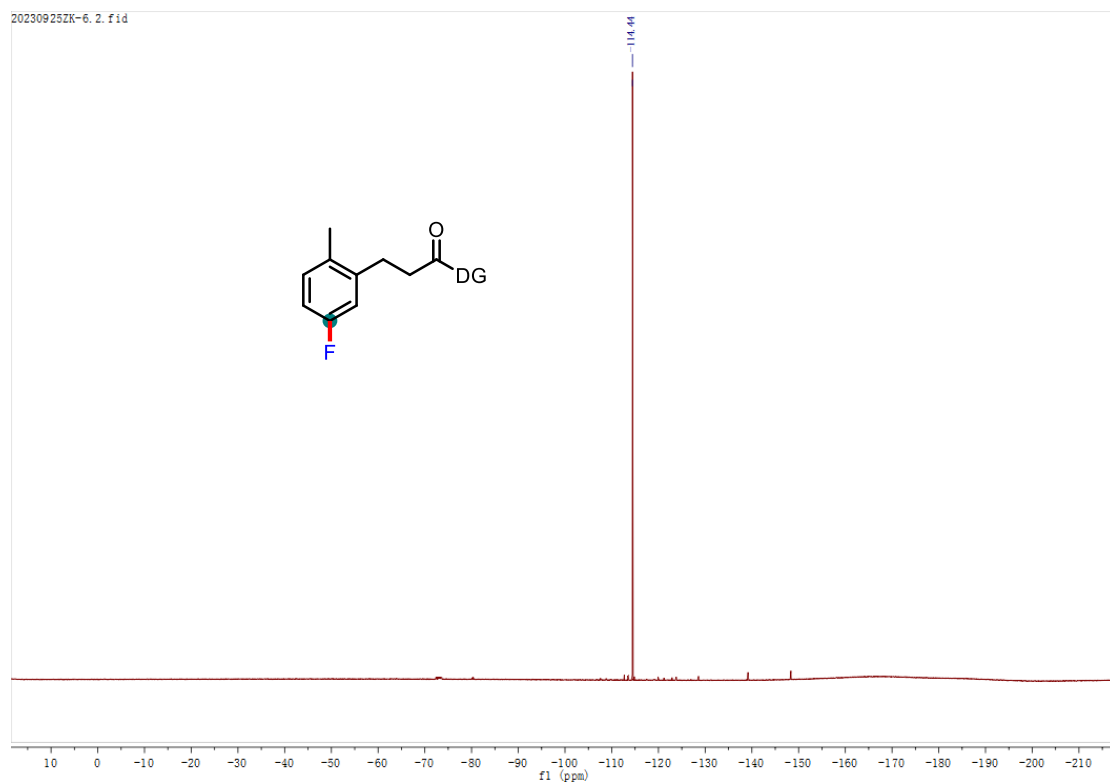

**<sup>19</sup>F NMR spectrum of 4b (376 MHz, CDCl<sub>3</sub>)**

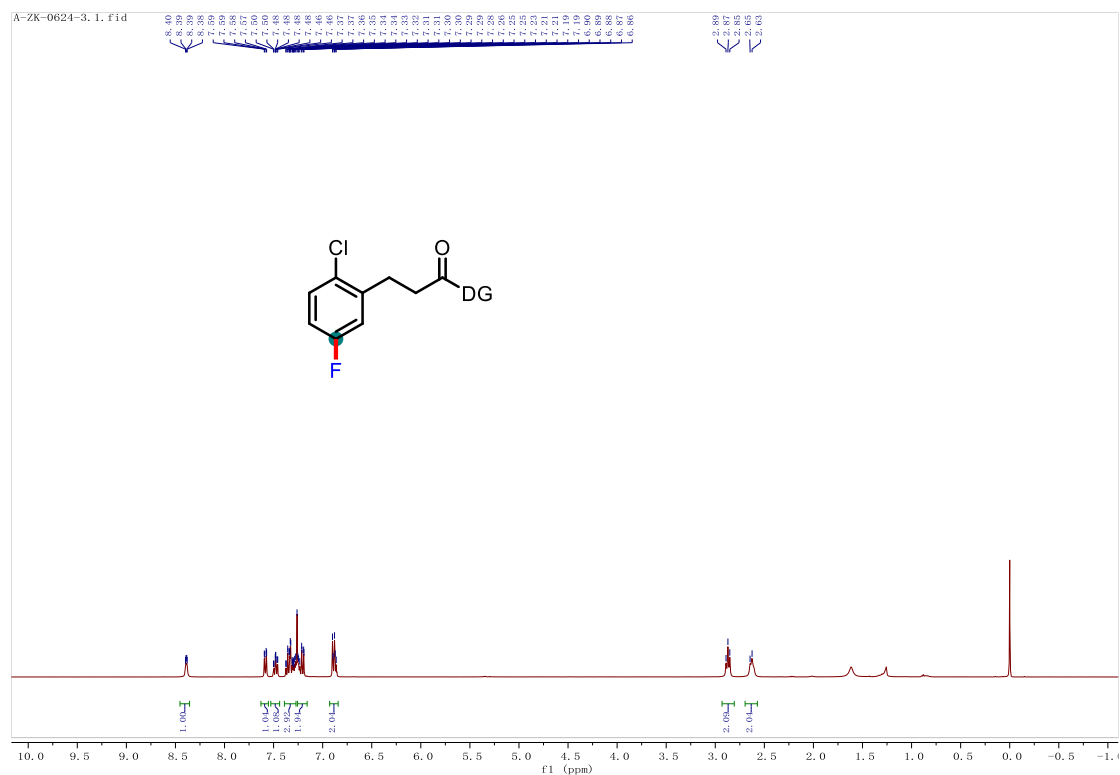

**<sup>1</sup>H NMR spectrum of 4c (400 MHz, CDCl<sub>3</sub>)**

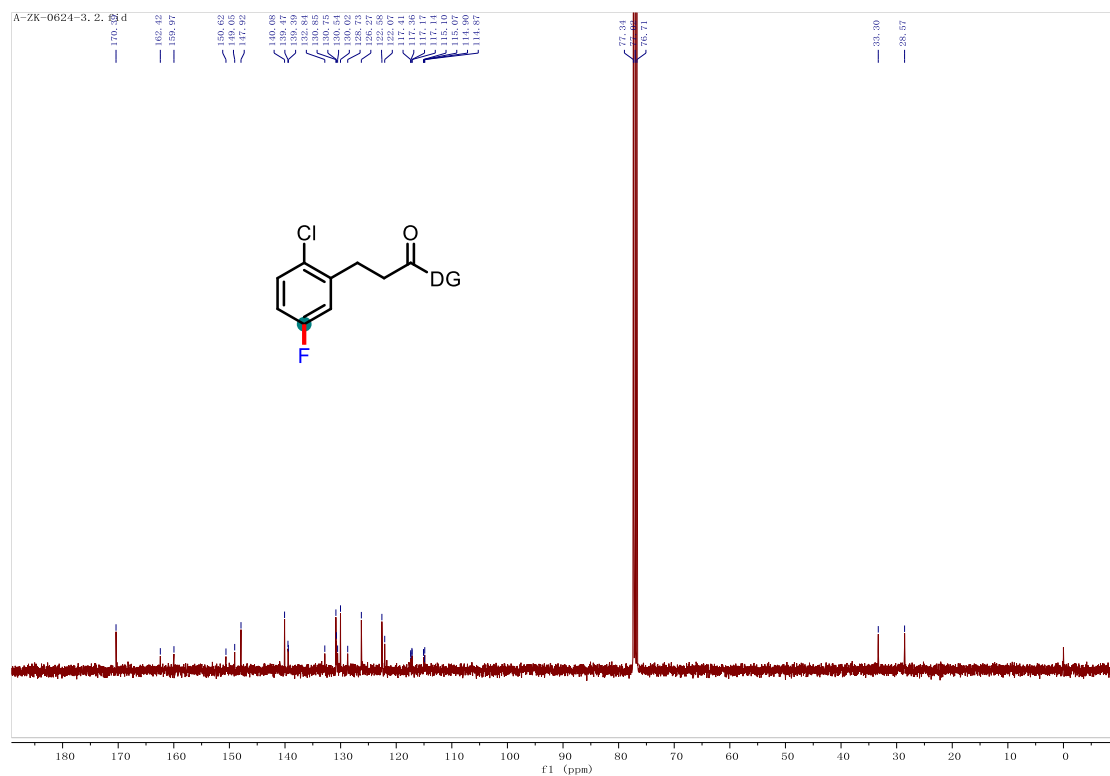

**<sup>13</sup>C NMR spectrum of 4c (101 MHz, CDCl<sub>3</sub>)**

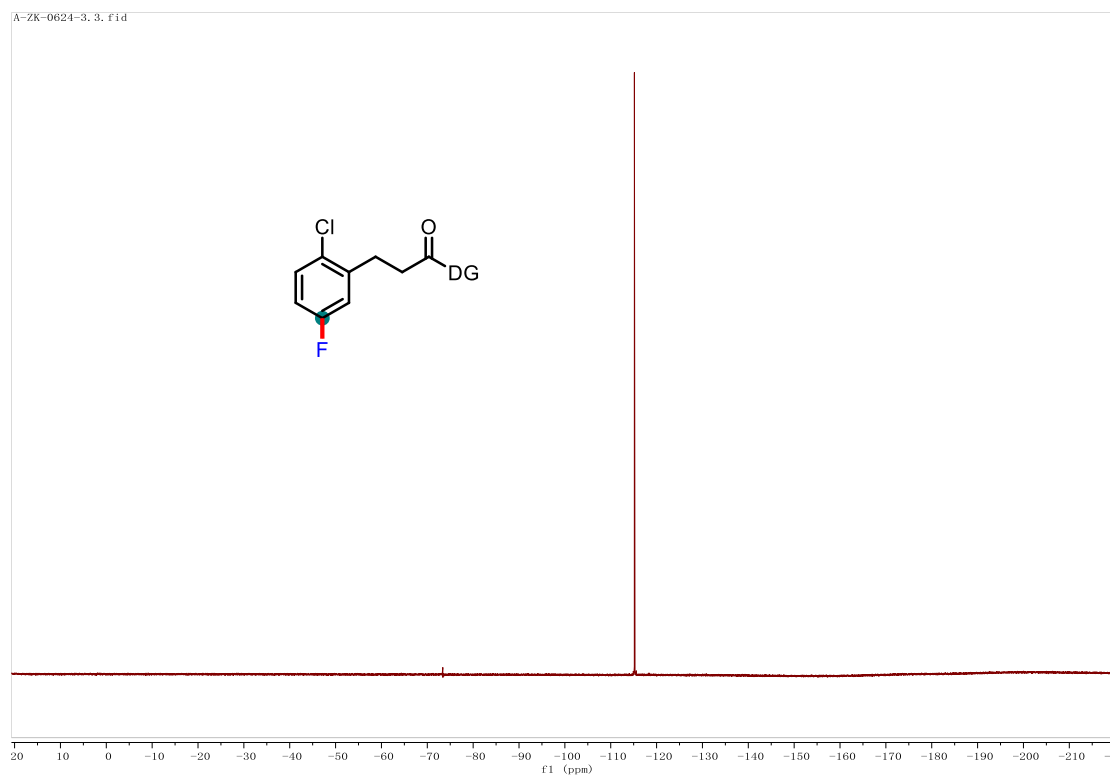

**<sup>19</sup>F NMR spectrum of 4c (376 MHz, CDCl<sub>3</sub>)**



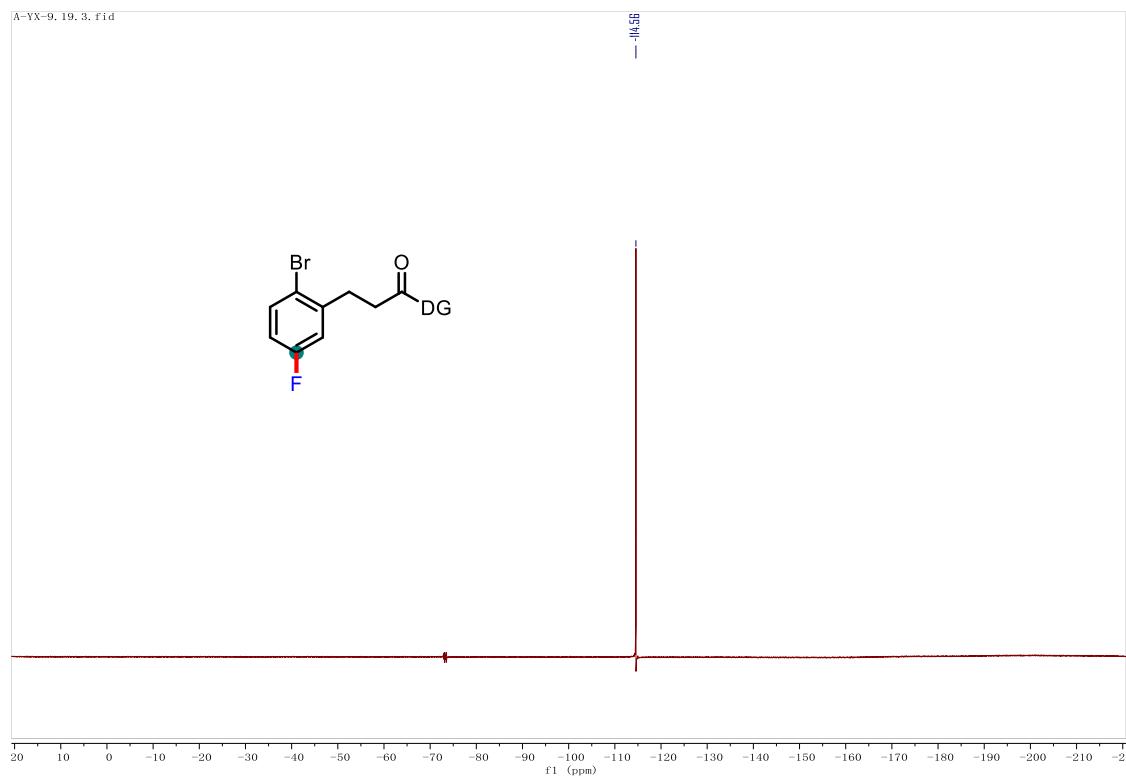

**<sup>19</sup>F NMR spectrum of 4d (376 MHz, CDCl<sub>3</sub>)**

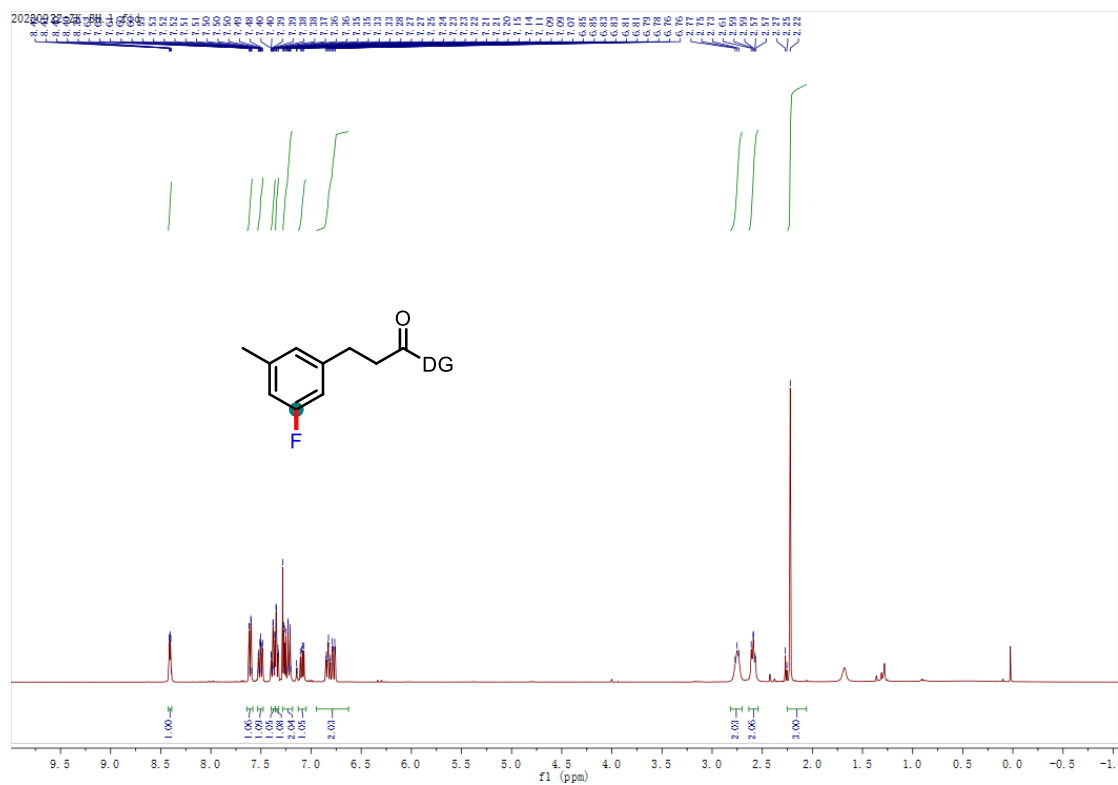

**<sup>1</sup>H NMR spectrum of 4e (400 MHz, CDCl<sub>3</sub>)**

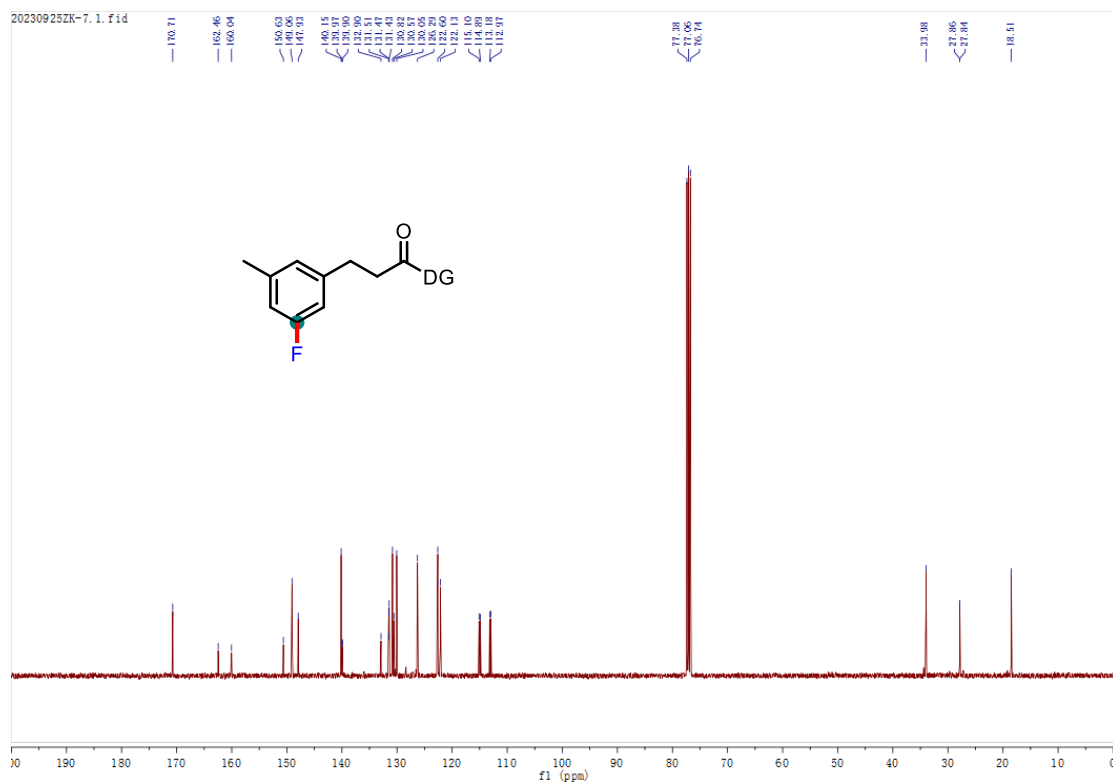

**<sup>13</sup>C NMR spectrum of 4e (101 MHz, CDCl<sub>3</sub>)**

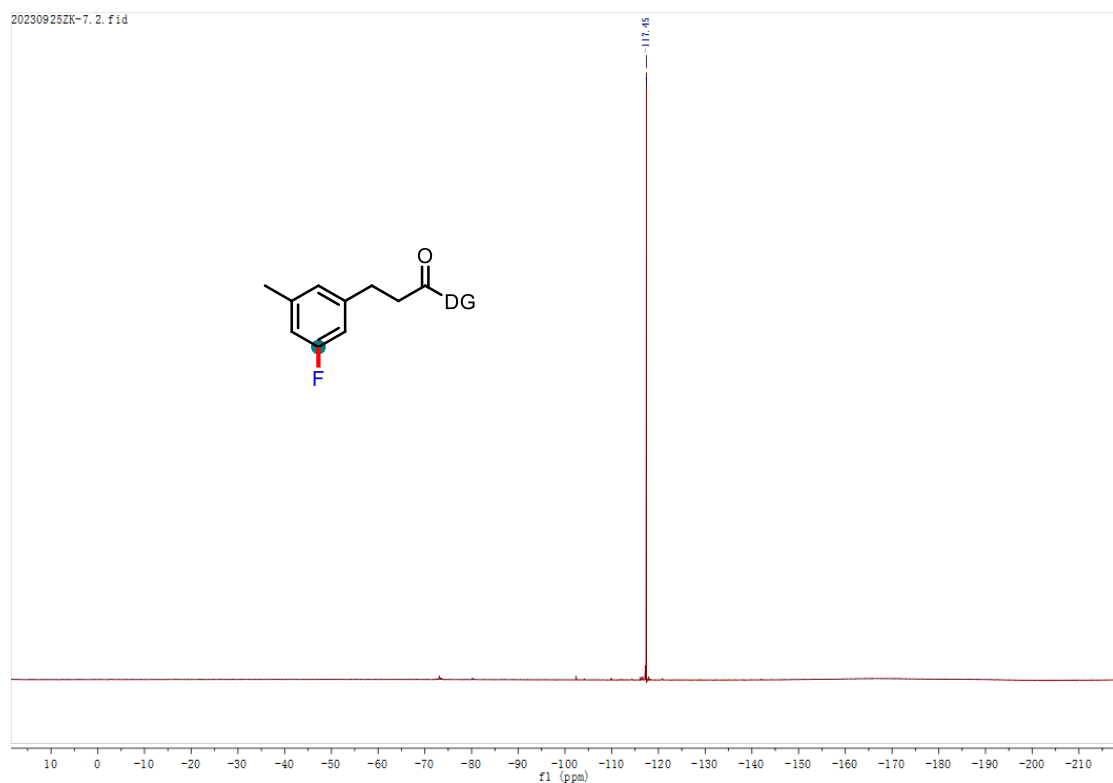

**<sup>19</sup>F NMR spectrum of 4e (376 MHz, CDCl<sub>3</sub>)**

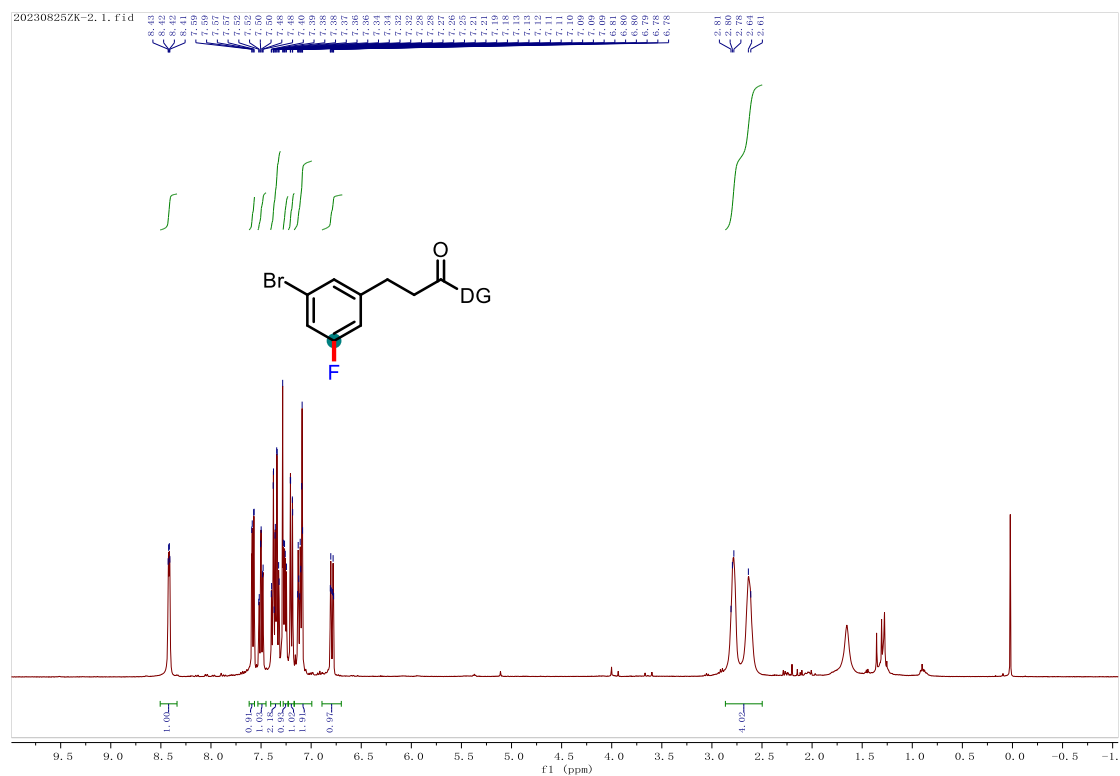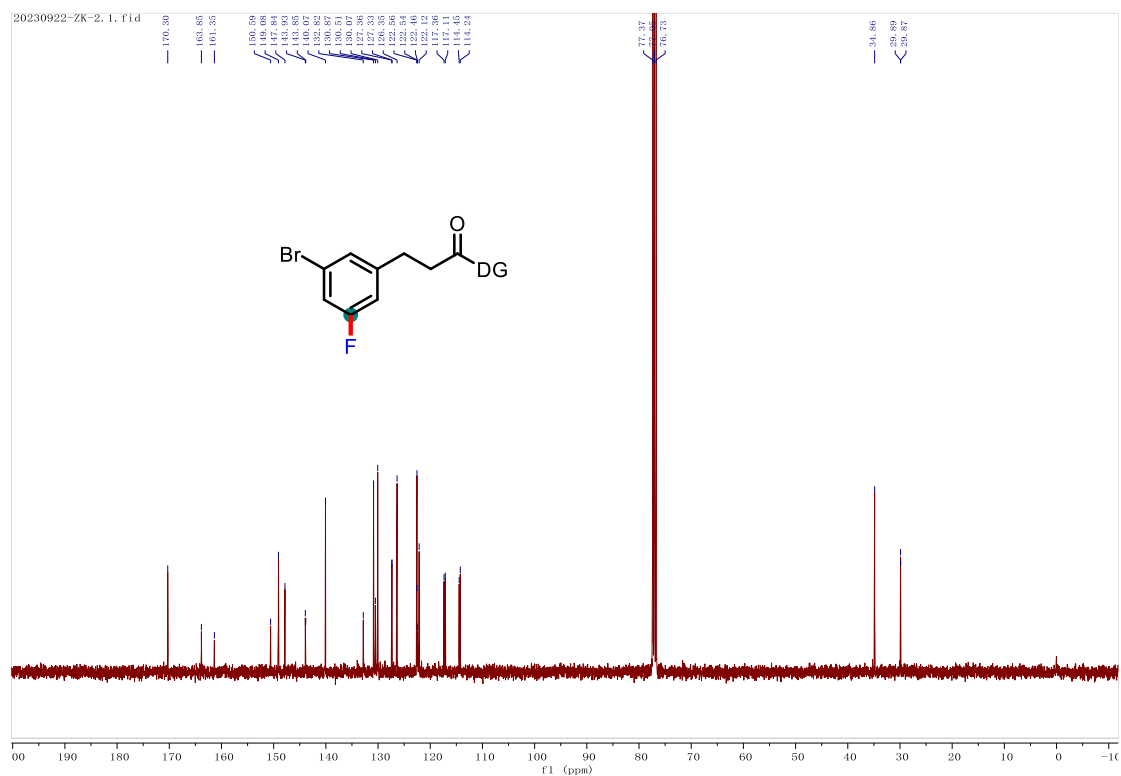

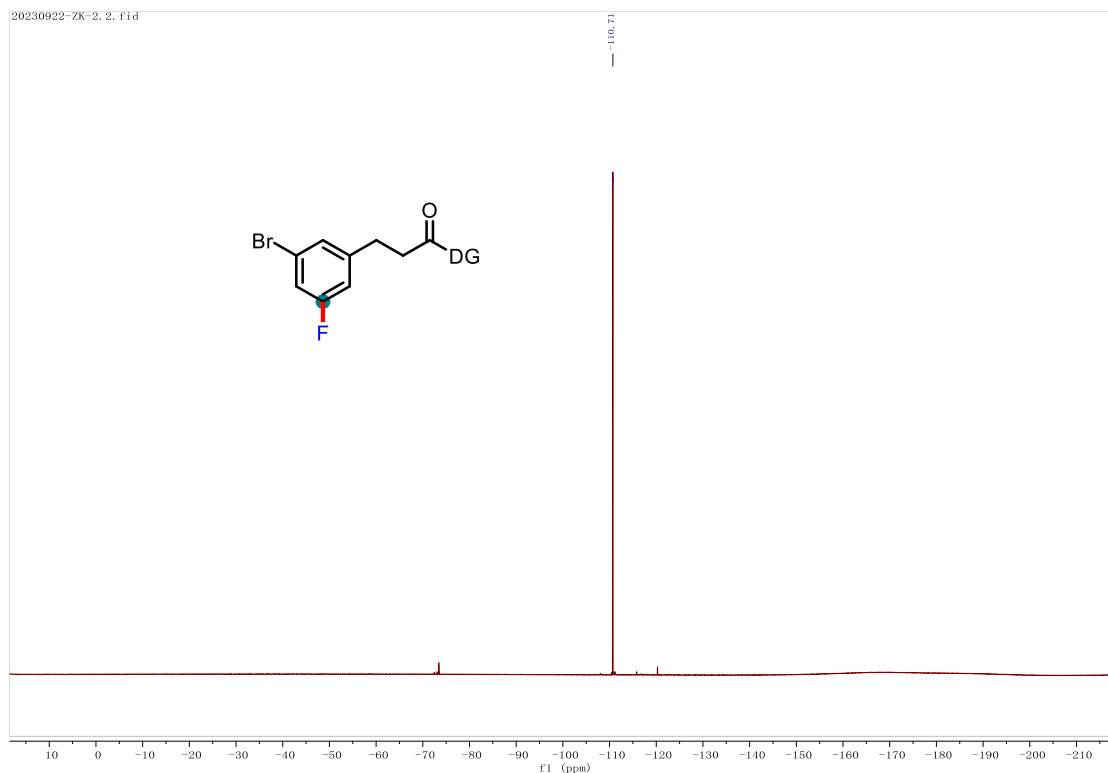

$^{19}\text{F}$  NMR spectrum of 4f (376 MHz,  $\text{CDCl}_3$ )

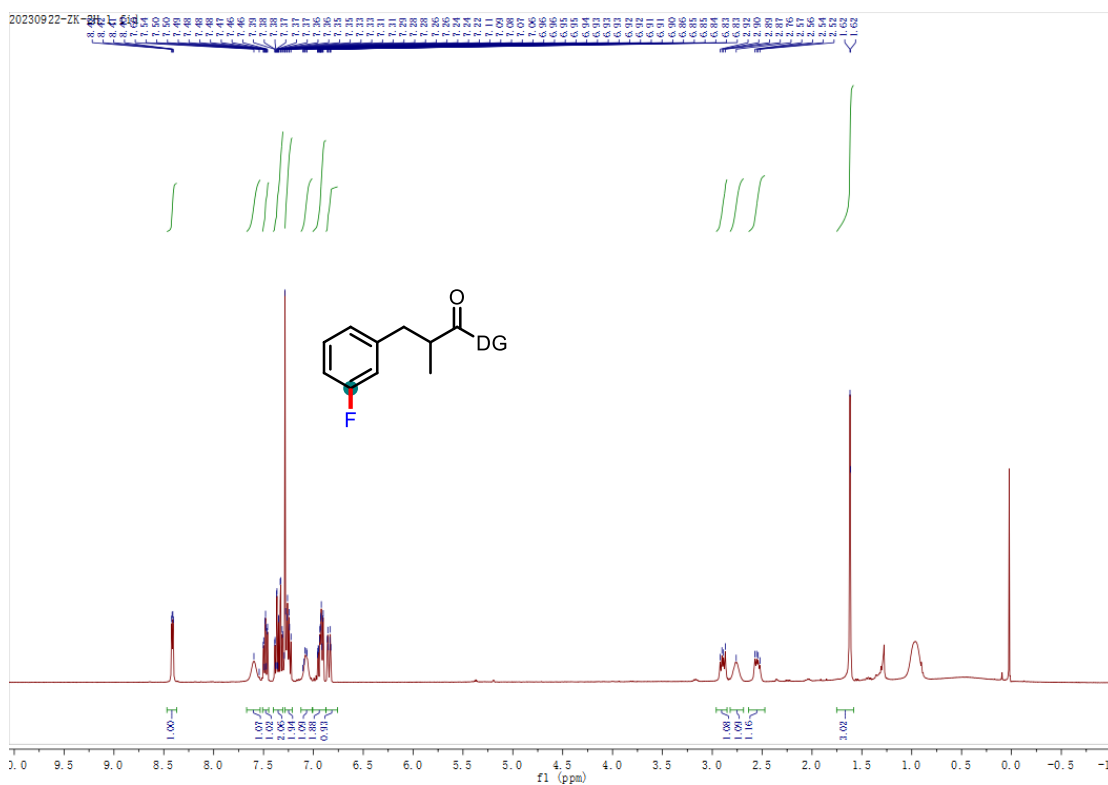

$^1\text{H}$  NMR spectrum of 4g (400 MHz,  $\text{CDCl}_3$ )

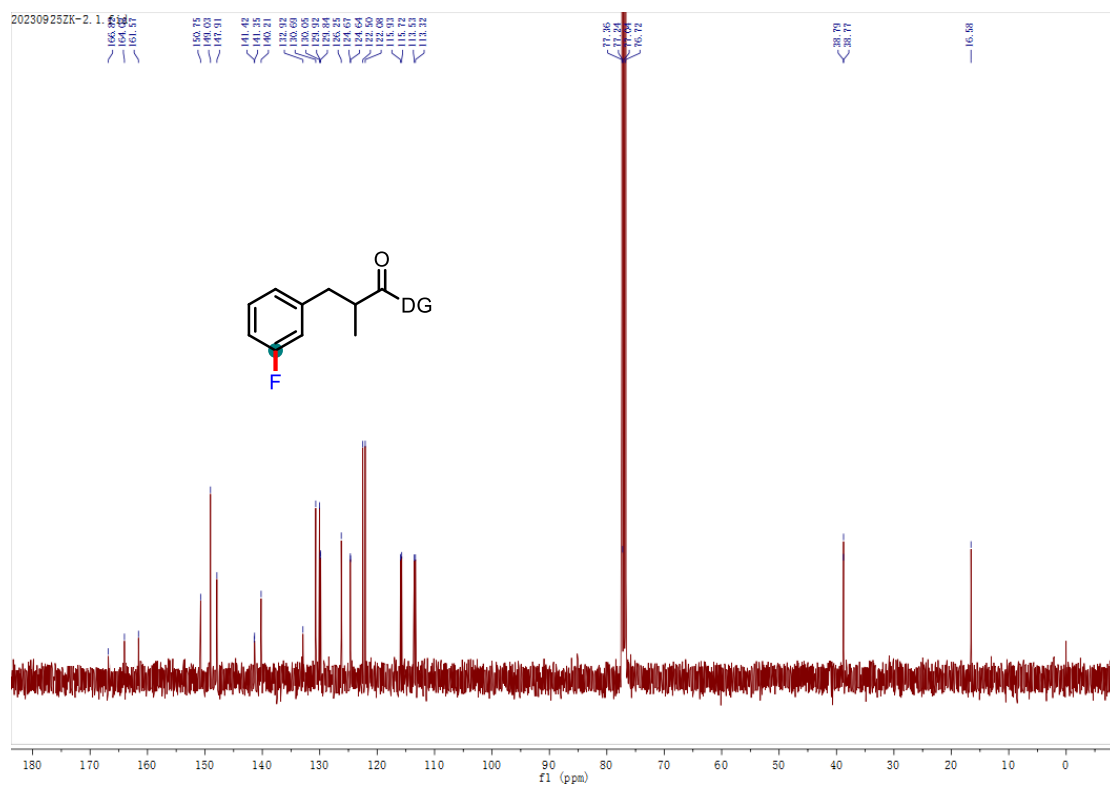

**$^{13}\text{C}$  NMR spectrum of 4g (101 MHz,  $\text{CDCl}_3$ )**

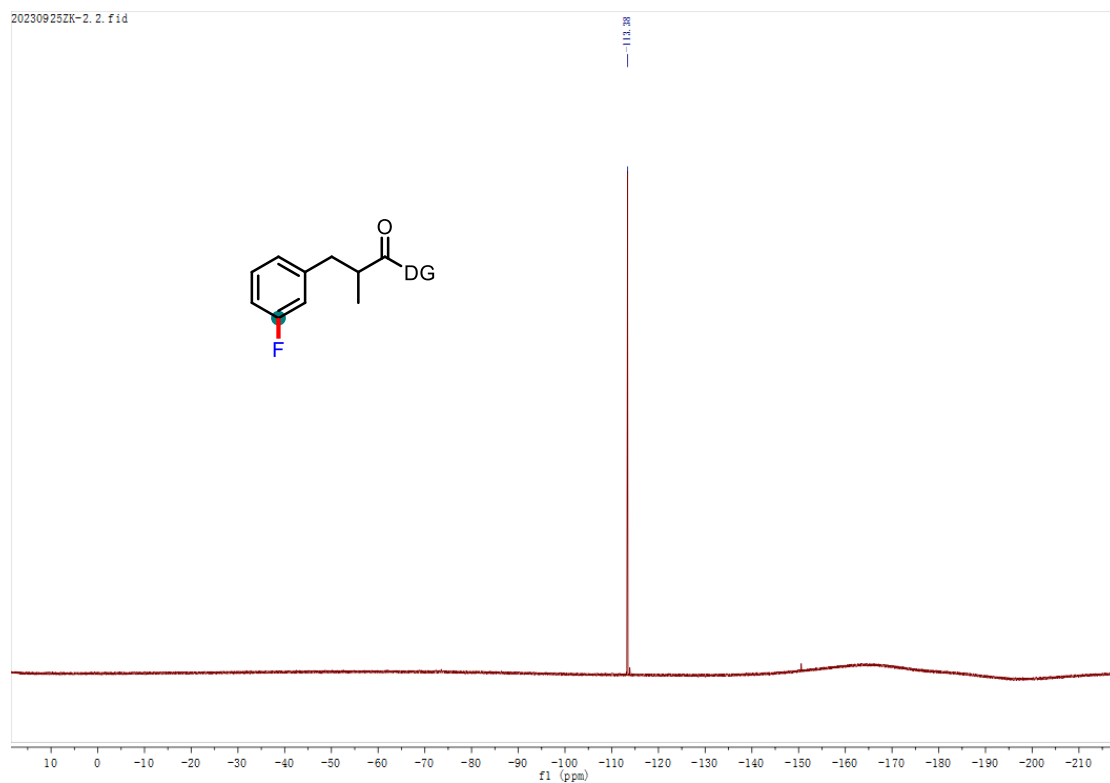

**$^{19}\text{F}$  NMR spectrum of 4g (376 MHz,  $\text{CDCl}_3$ )**

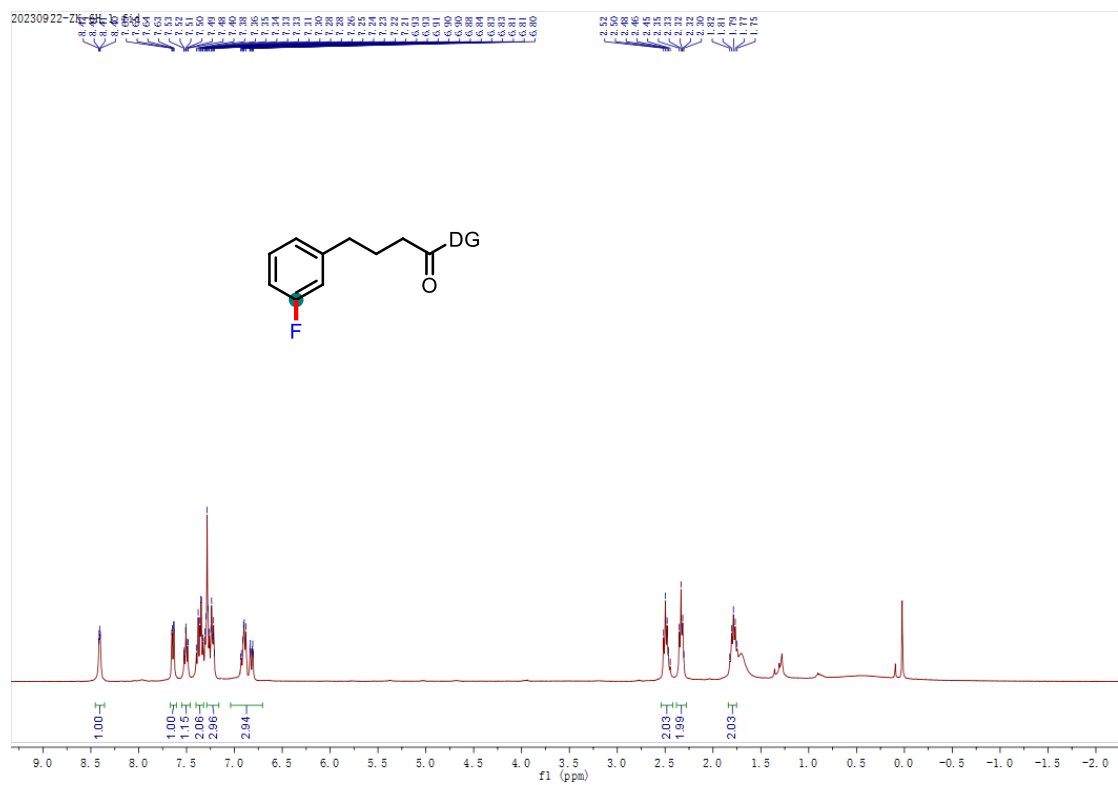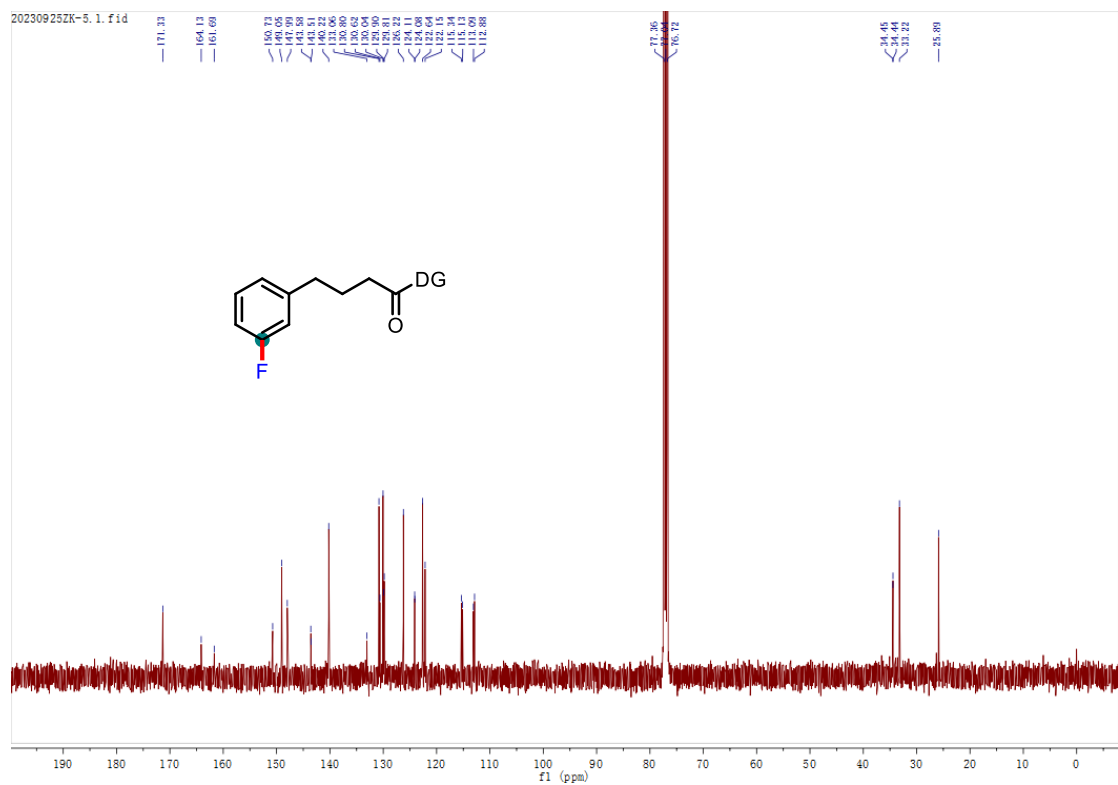





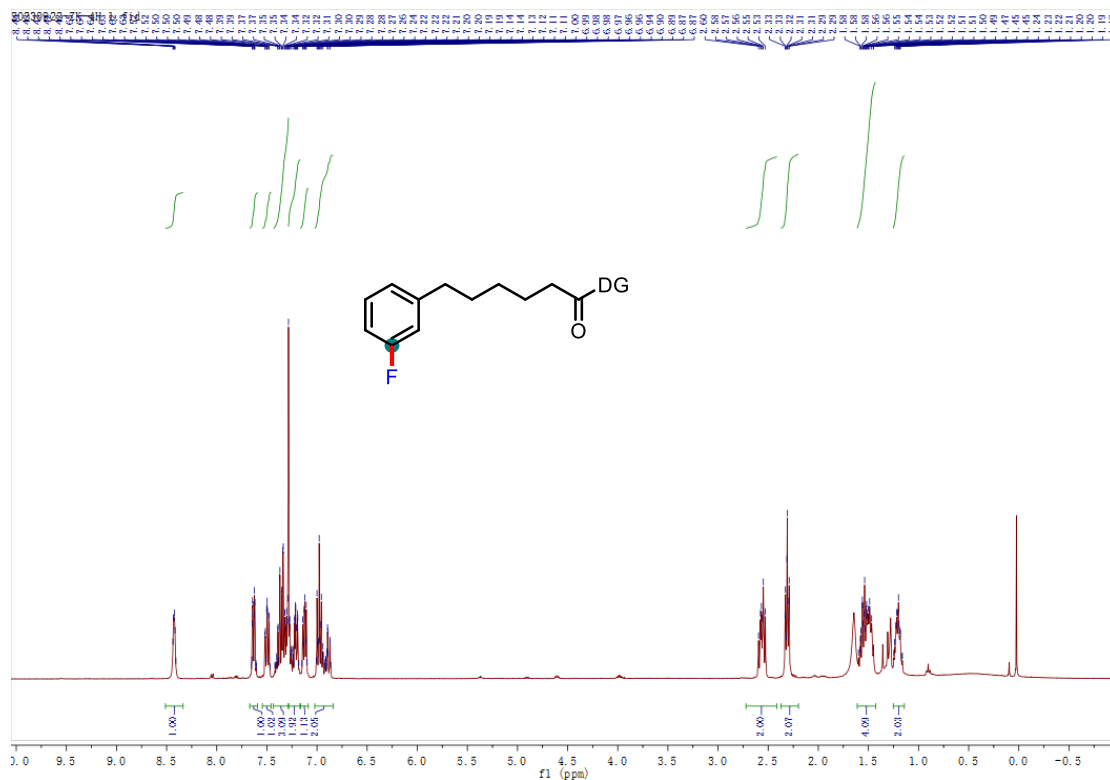

<sup>1</sup>H NMR spectrum of 4j (400 MHz, CDCl<sub>3</sub>)

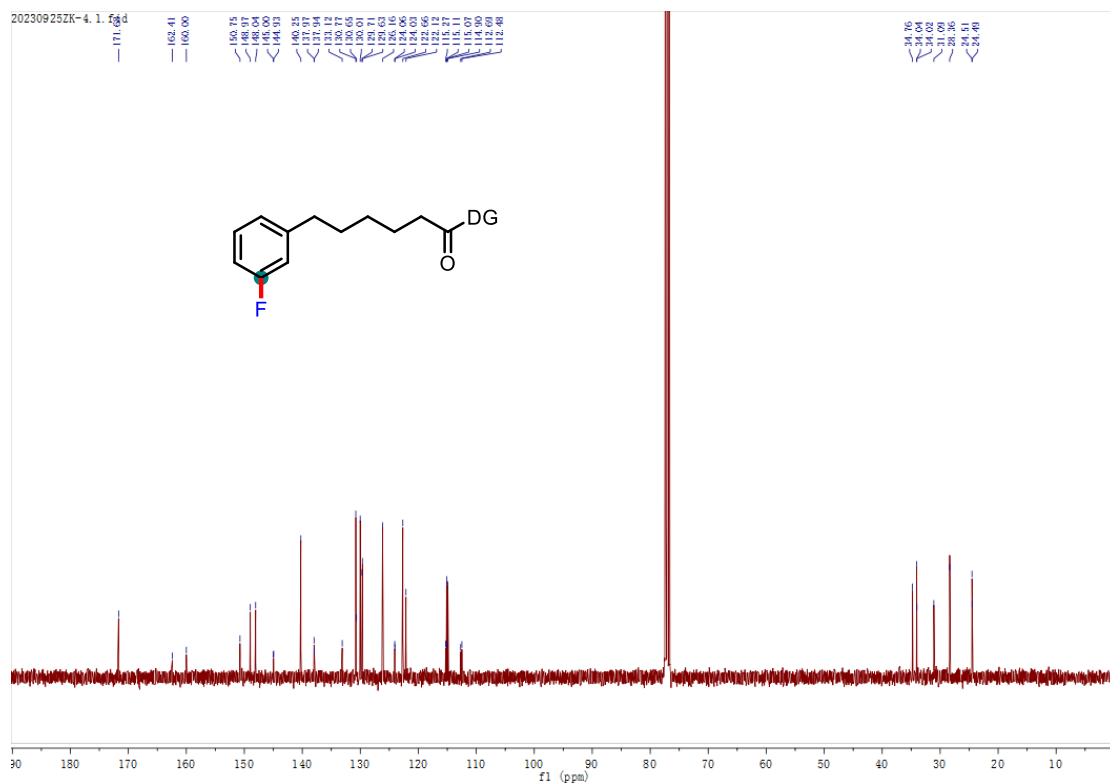

<sup>13</sup>C NMR spectrum of 4j (101 MHz, CDCl<sub>3</sub>)

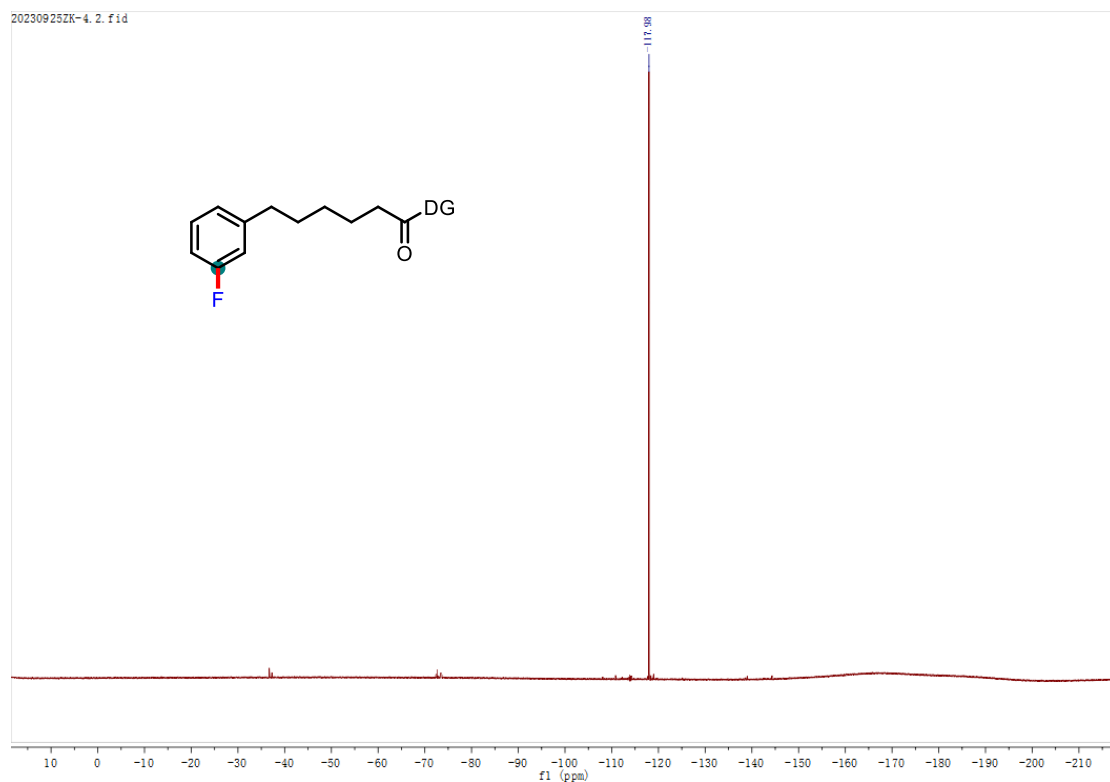

$^{19}\text{F}$  NMR spectrum of 4j (376 MHz,  $\text{CDCl}_3$ )

### 10.3 NMR spectra of transformations

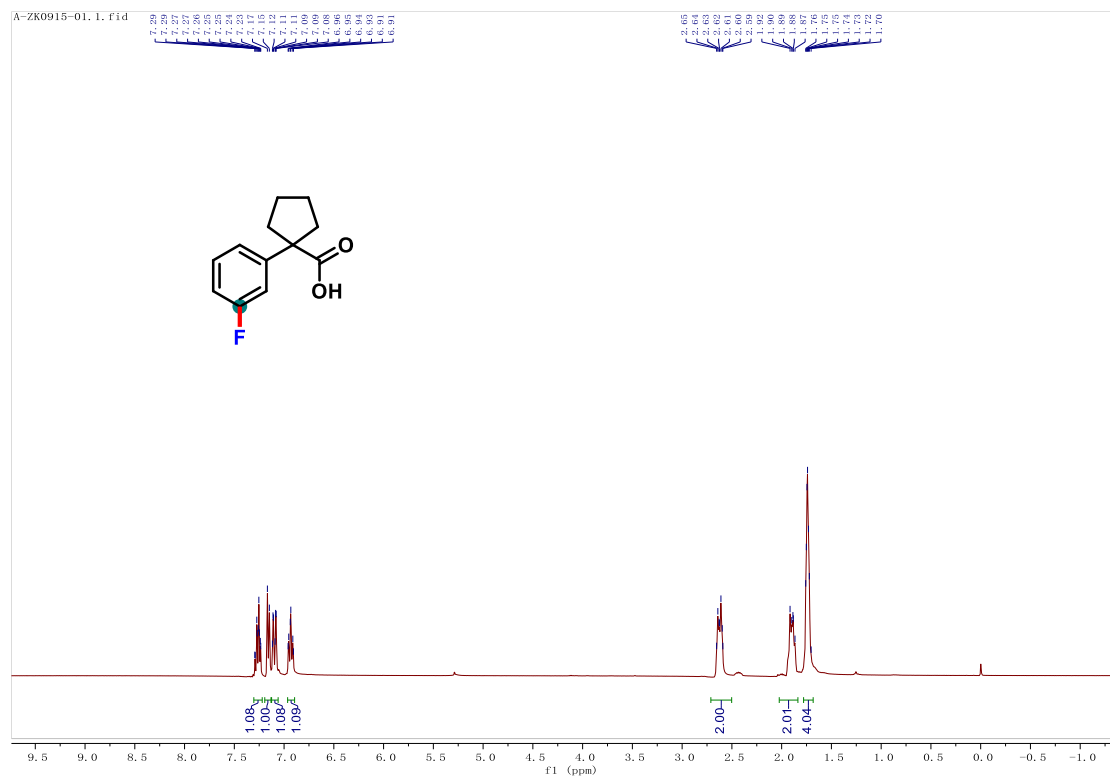

$^1\text{H}$  NMR spectrum of 5a (400 MHz,  $\text{CDCl}_3$ )

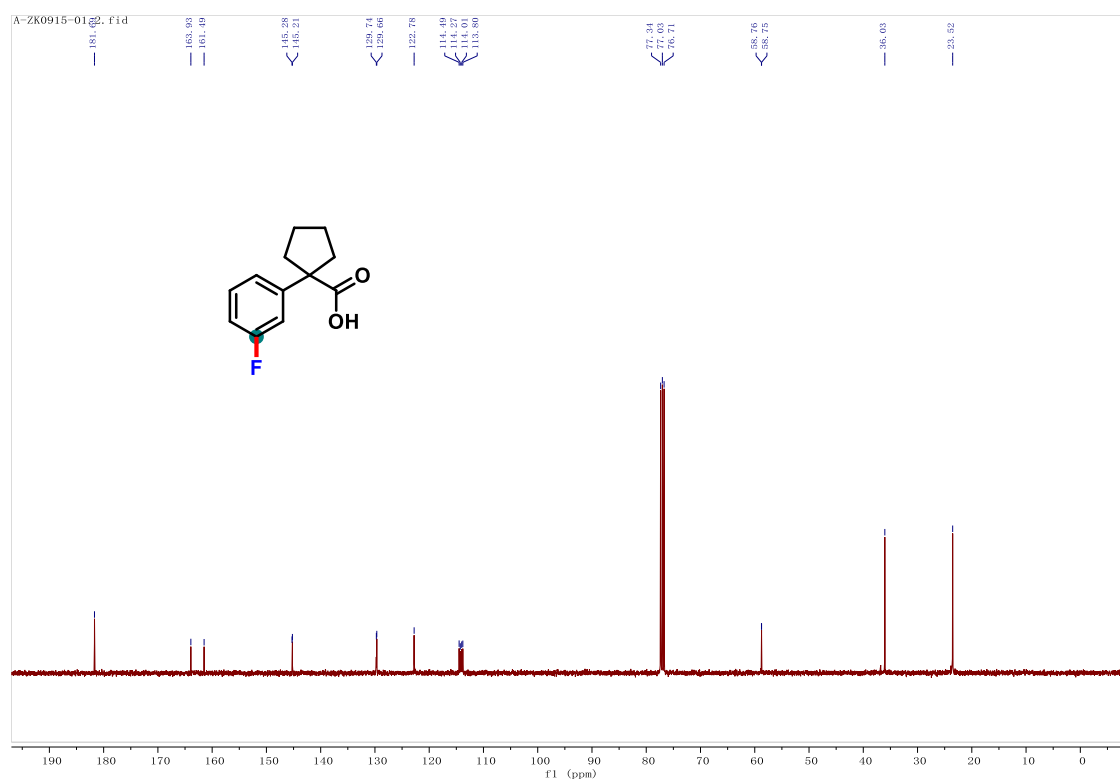

**<sup>13</sup>C NMR spectrum of 5a (101 MHz, CDCl<sub>3</sub>)**

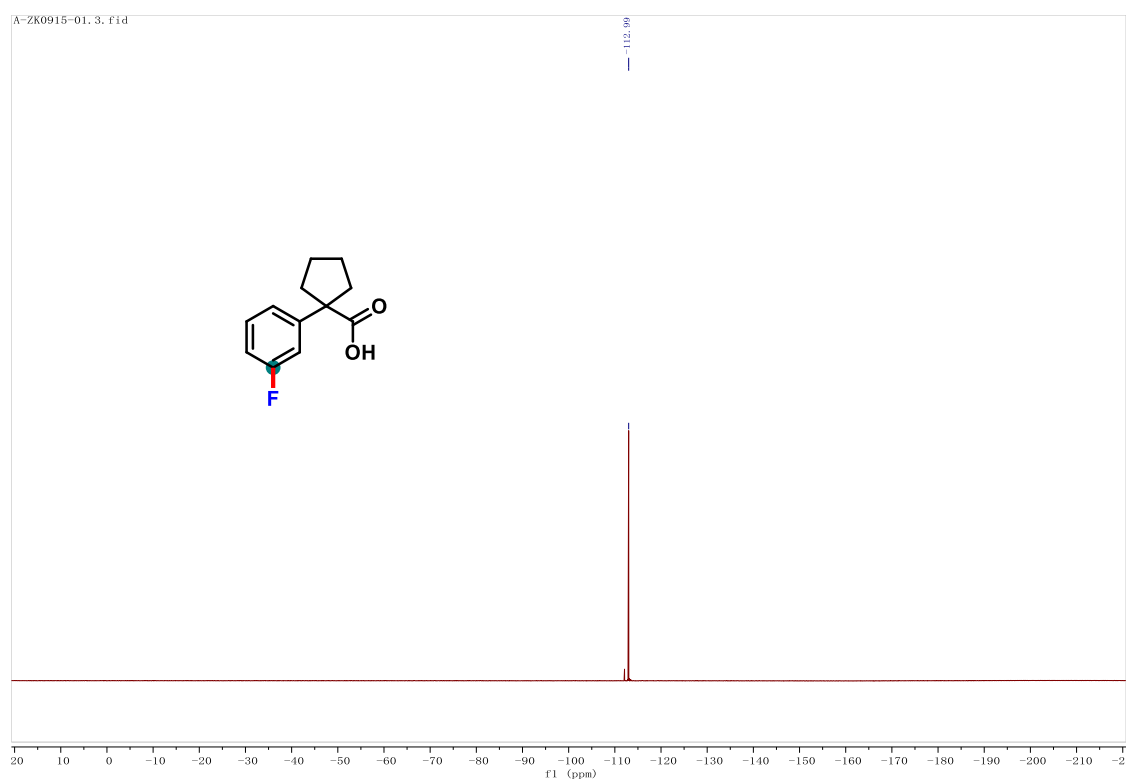

**<sup>19</sup>F NMR spectrum of 5a (376 MHz, CDCl<sub>3</sub>)**

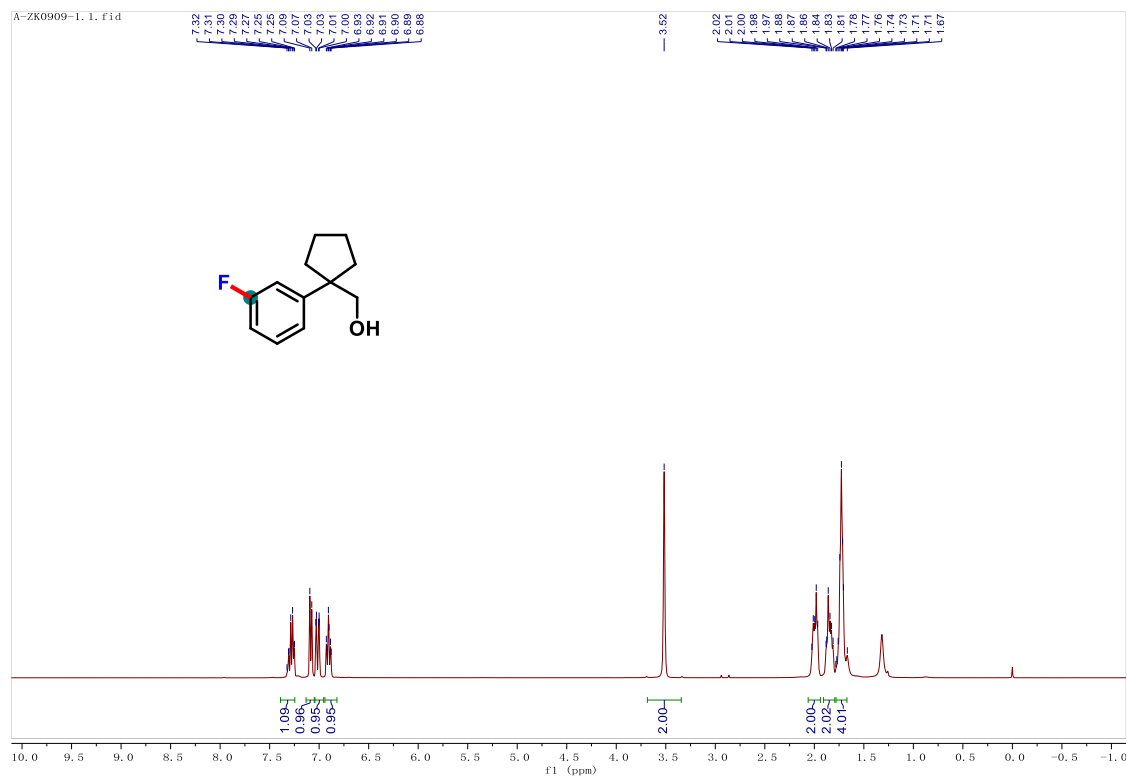

**<sup>1</sup>H NMR spectrum of 5b (400 MHz, CDCl<sub>3</sub>)**

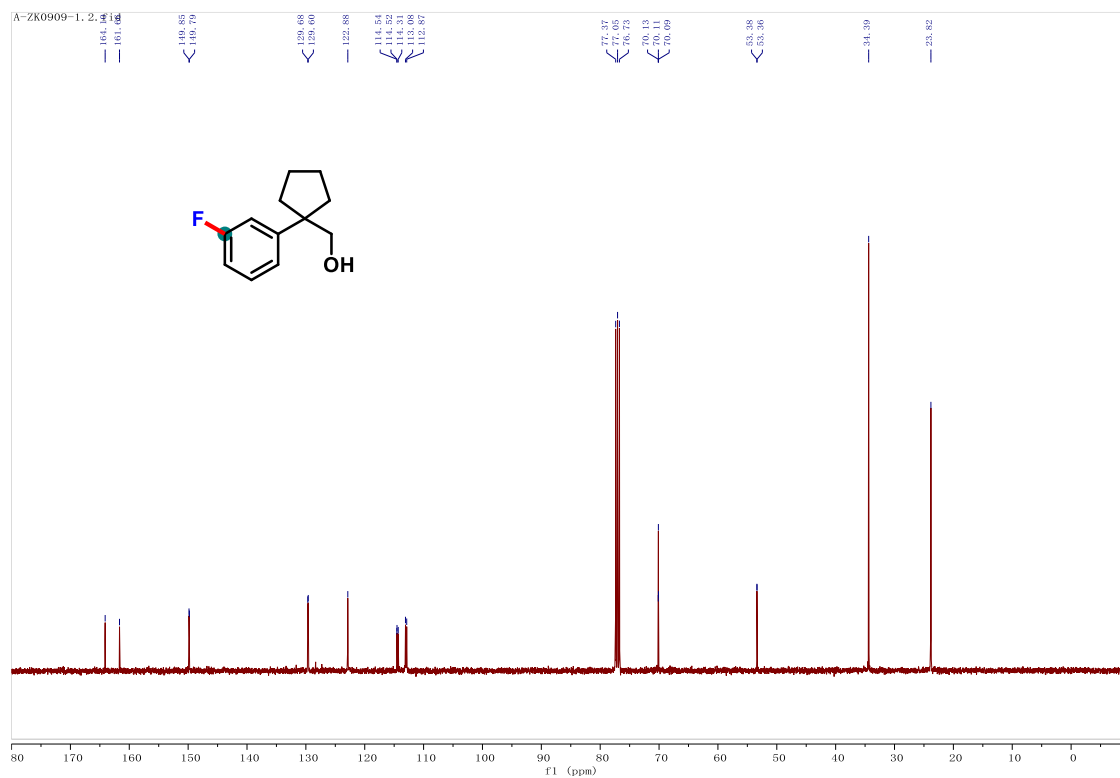

**<sup>13</sup>C NMR spectrum of 5b (101 MHz, CDCl<sub>3</sub>)**



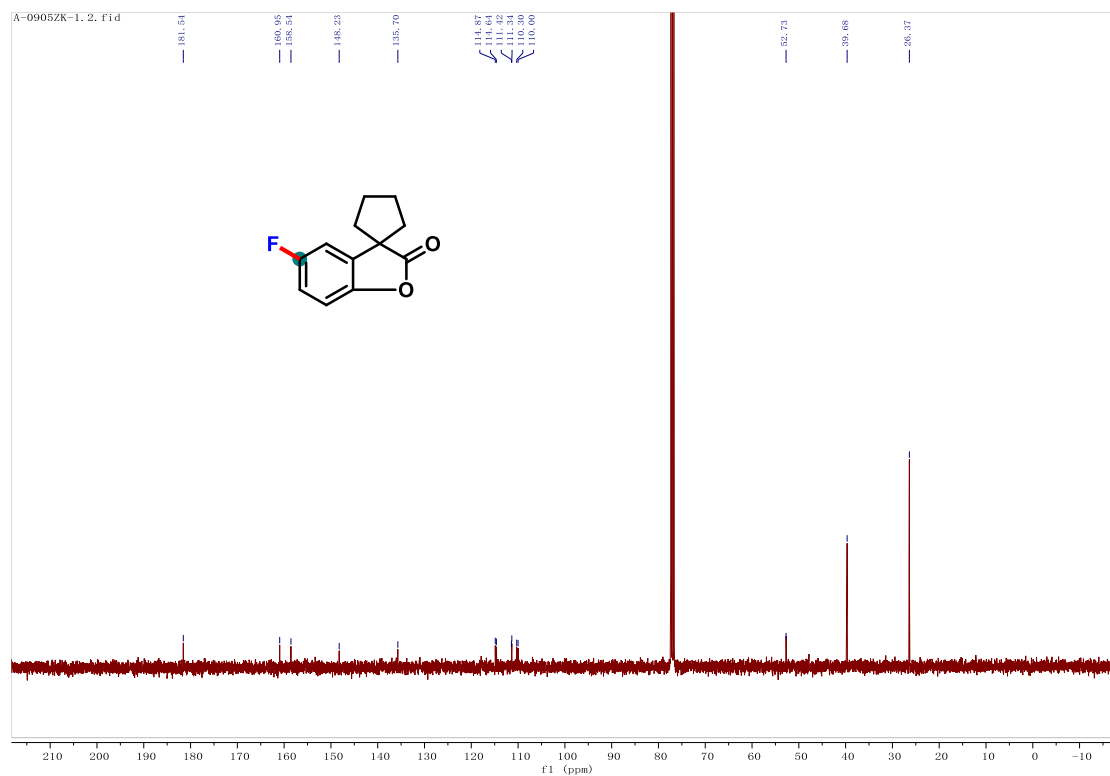

**$^{13}\text{C}$  NMR spectrum of 5c (101 MHz,  $\text{CDCl}_3$ )**

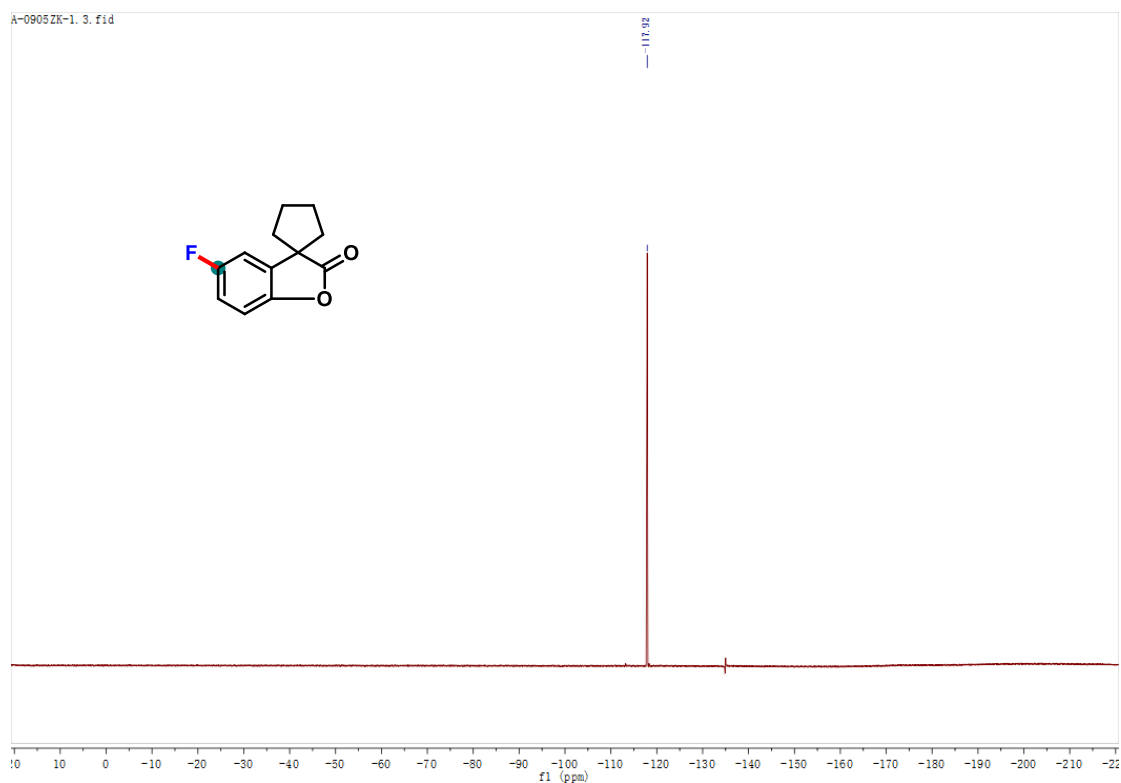

**$^{19}\text{F}$  NMR spectrum of 5c (376 MHz,  $\text{CDCl}_3$ )**

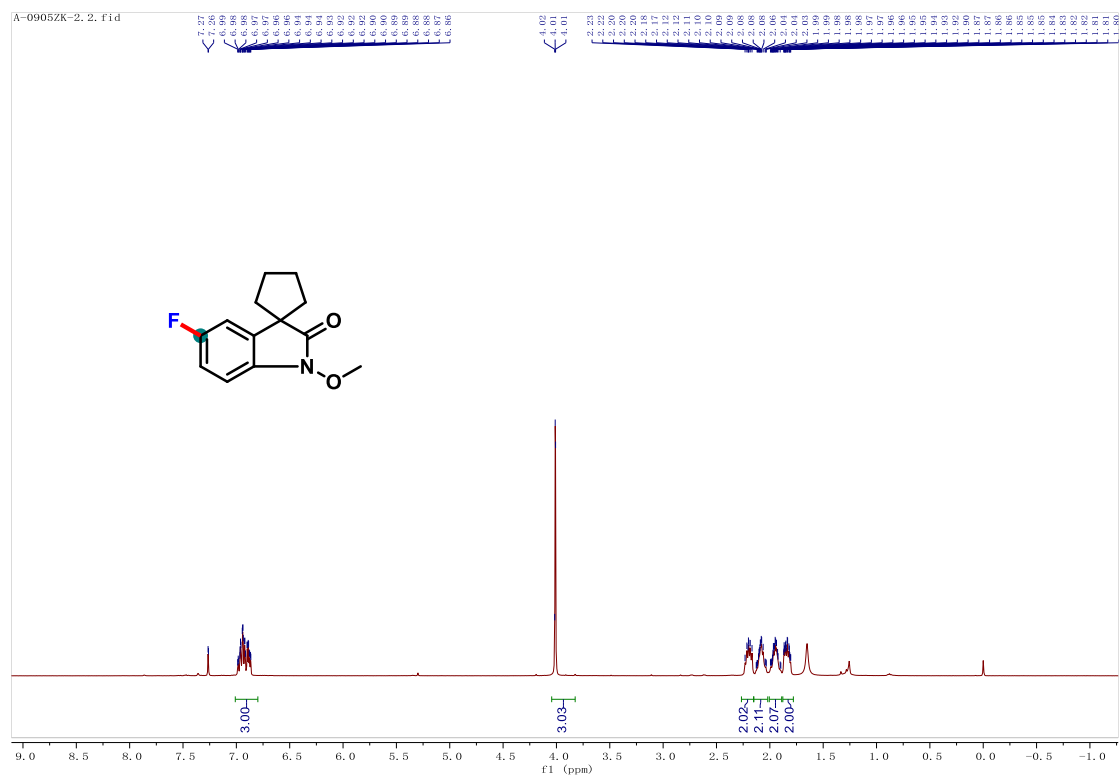

$^1\text{H}$  NMR spectrum of 5d (400 MHz,  $\text{CDCl}_3$ )

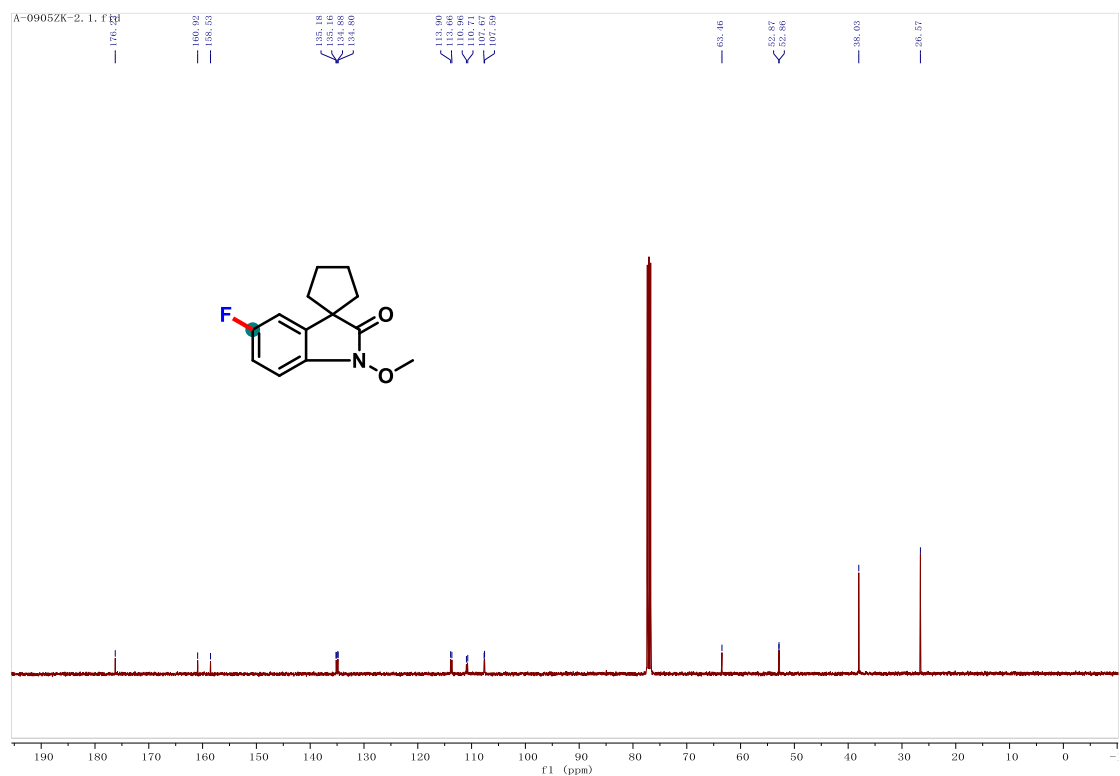

$^{13}\text{C}$  NMR spectrum of 5d (101 MHz,  $\text{CDCl}_3$ )

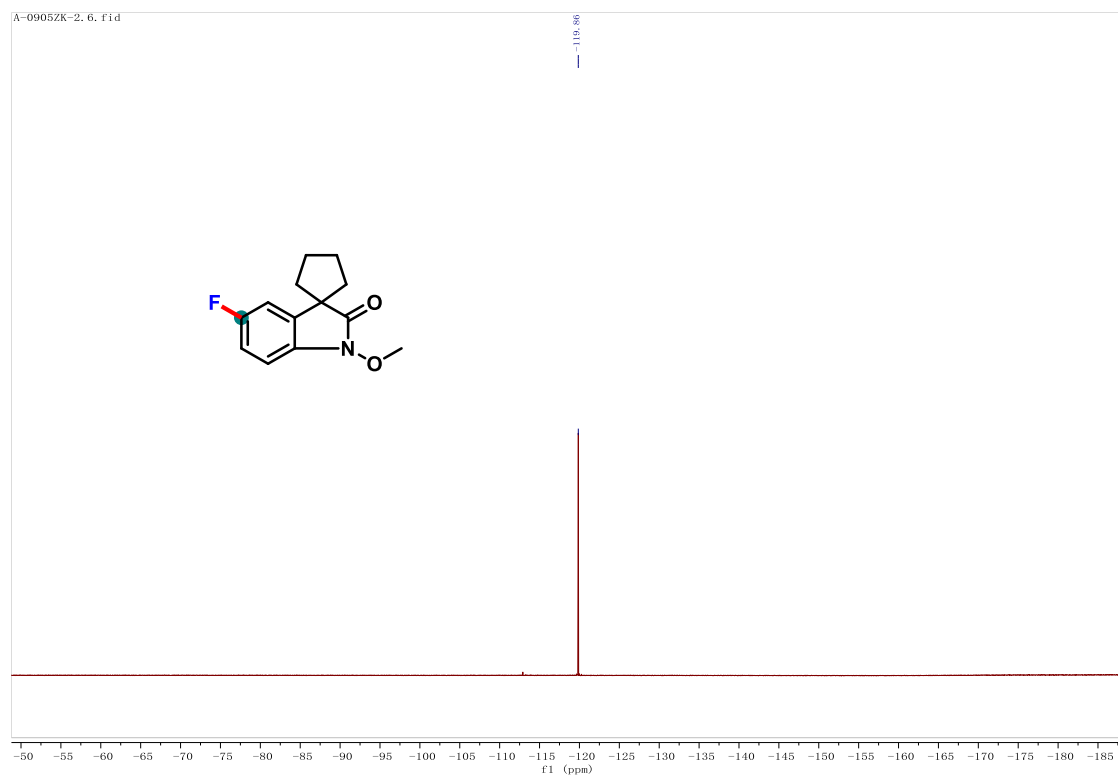

**<sup>19</sup>F NMR spectrum of 5d (376 MHz, CDCl<sub>3</sub>)**

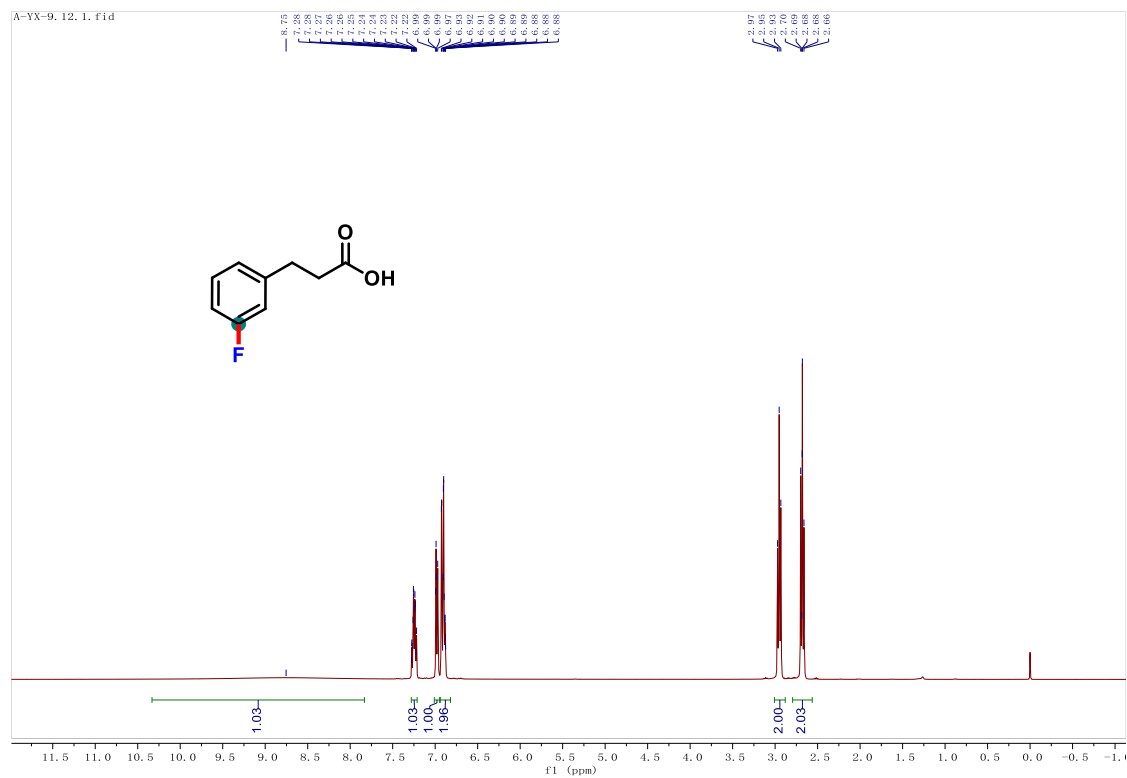

**<sup>1</sup>H NMR spectrum of 5e (400 MHz, CDCl<sub>3</sub>)**

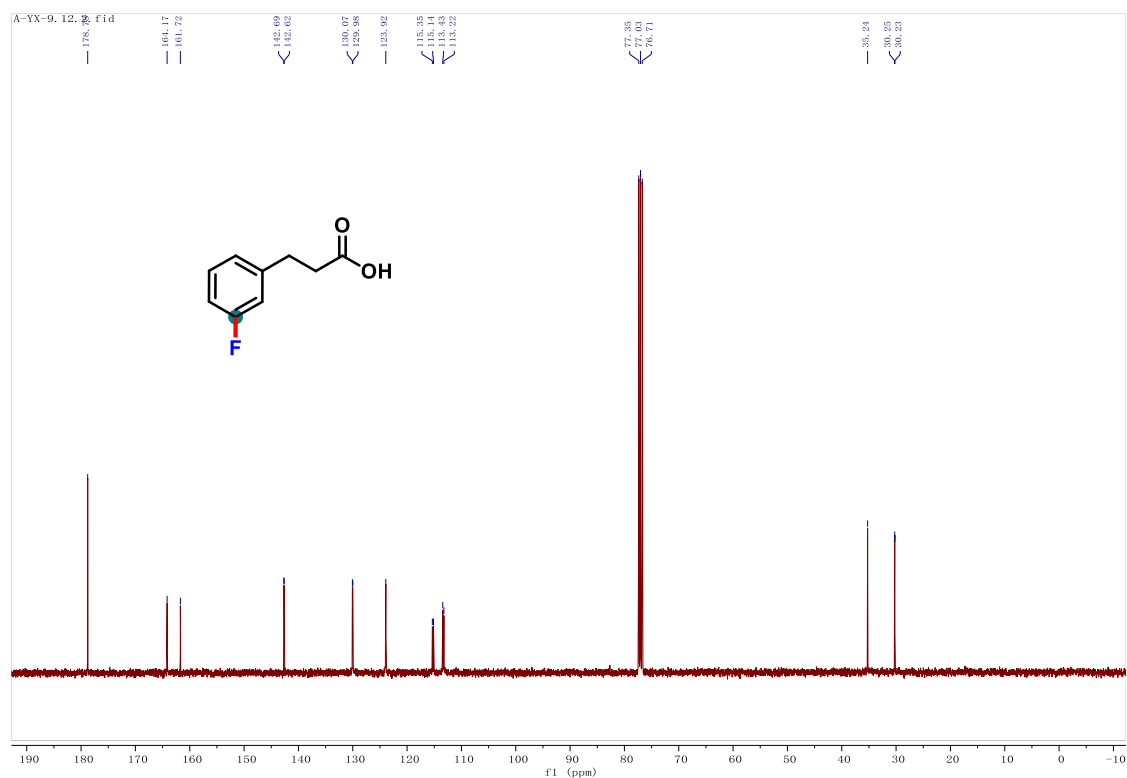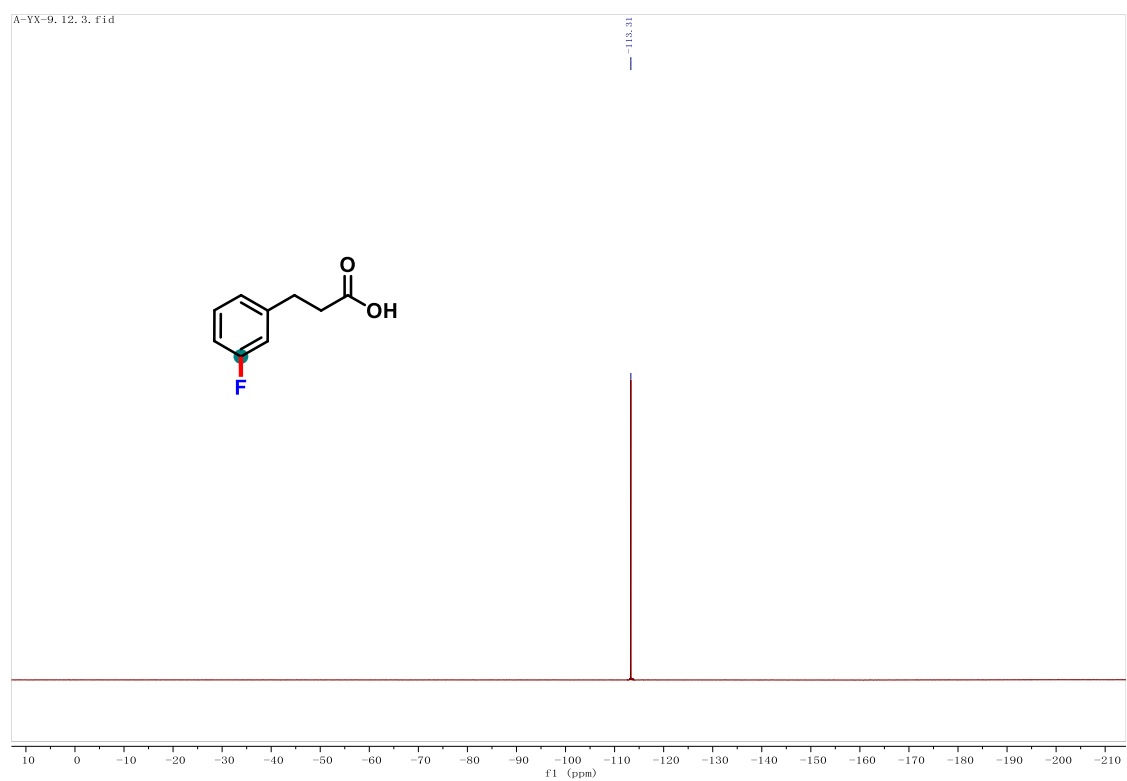

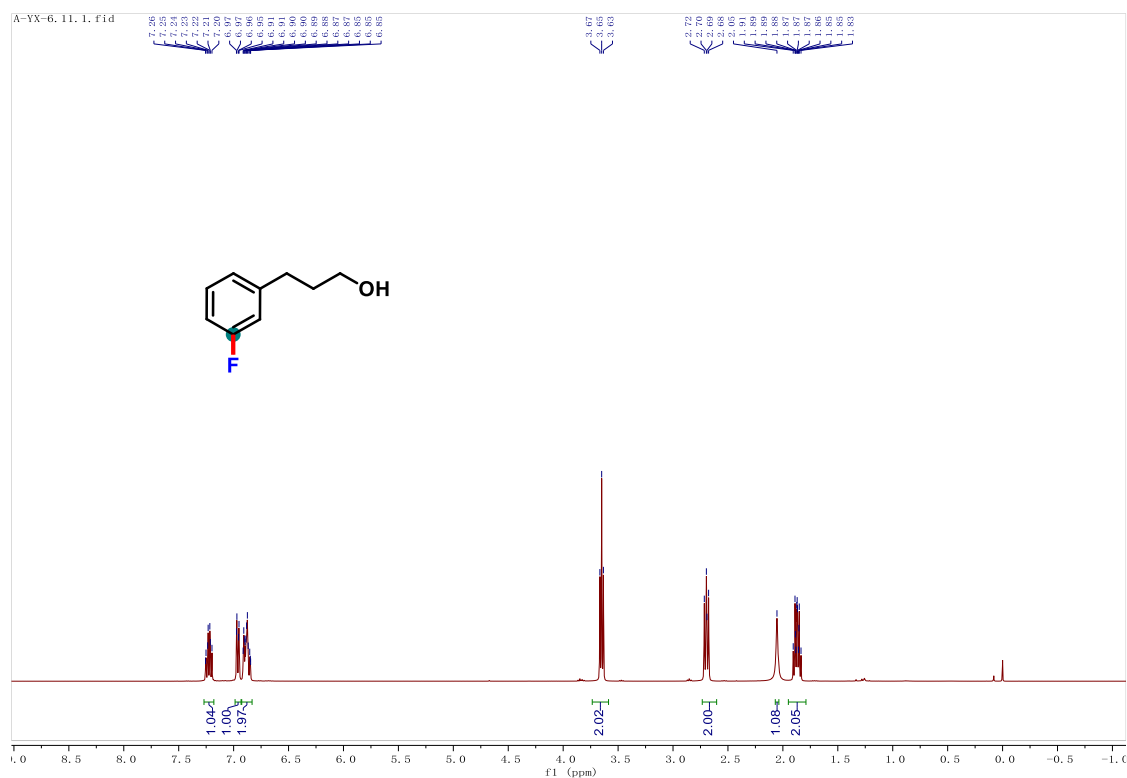

<sup>1</sup>H NMR spectrum of 5f (400 MHz, CDCl<sub>3</sub>)

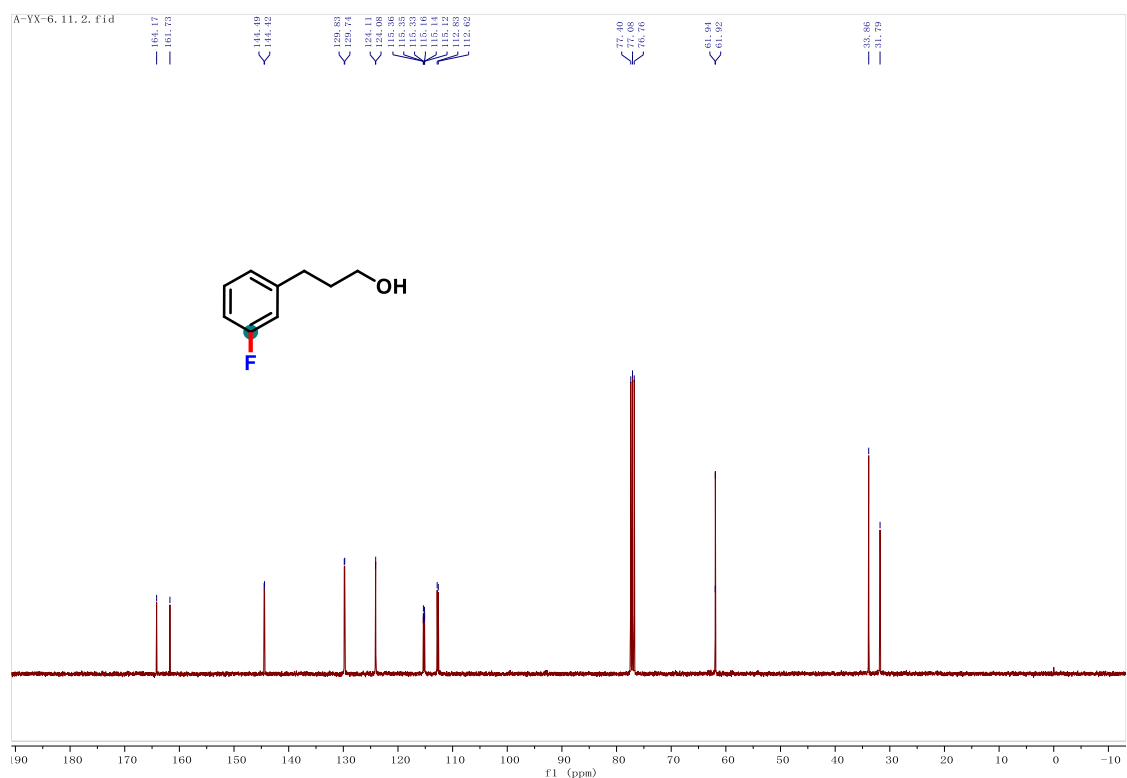

<sup>13</sup>C NMR spectrum of 5f (101 MHz, CDCl<sub>3</sub>)

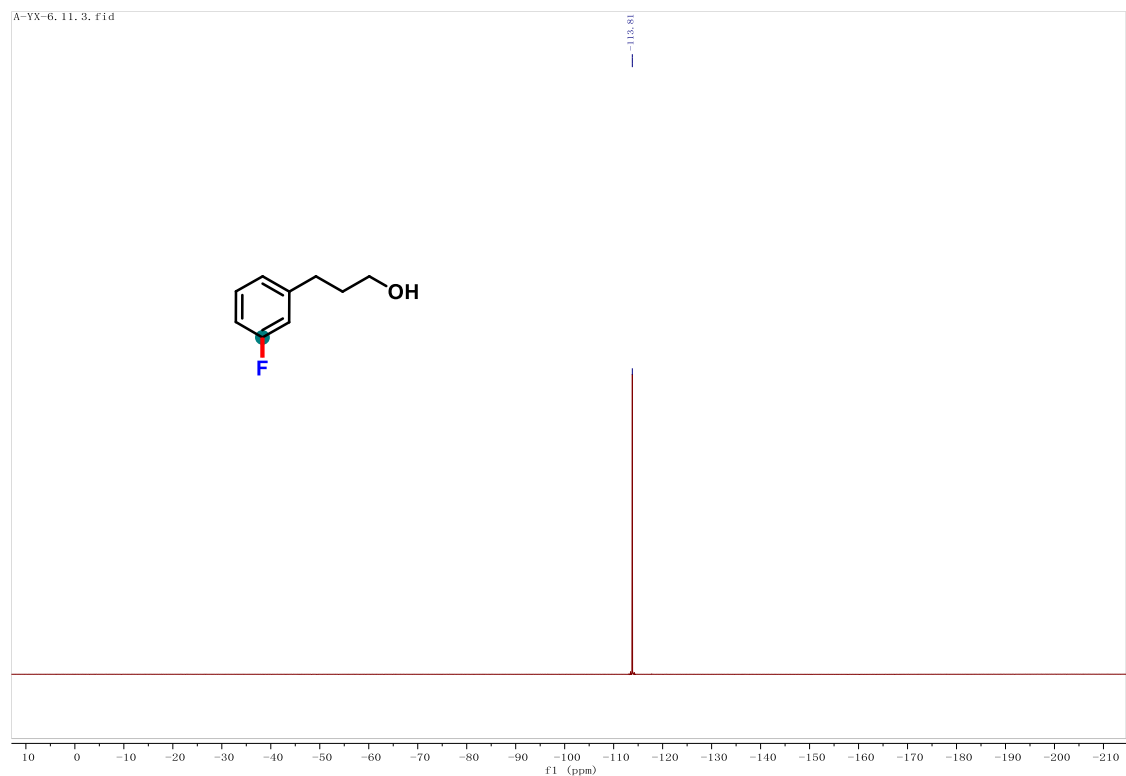

$^{19}\text{F}$  NMR spectrum of 5f (376 MHz,  $\text{CDCl}_3$ )

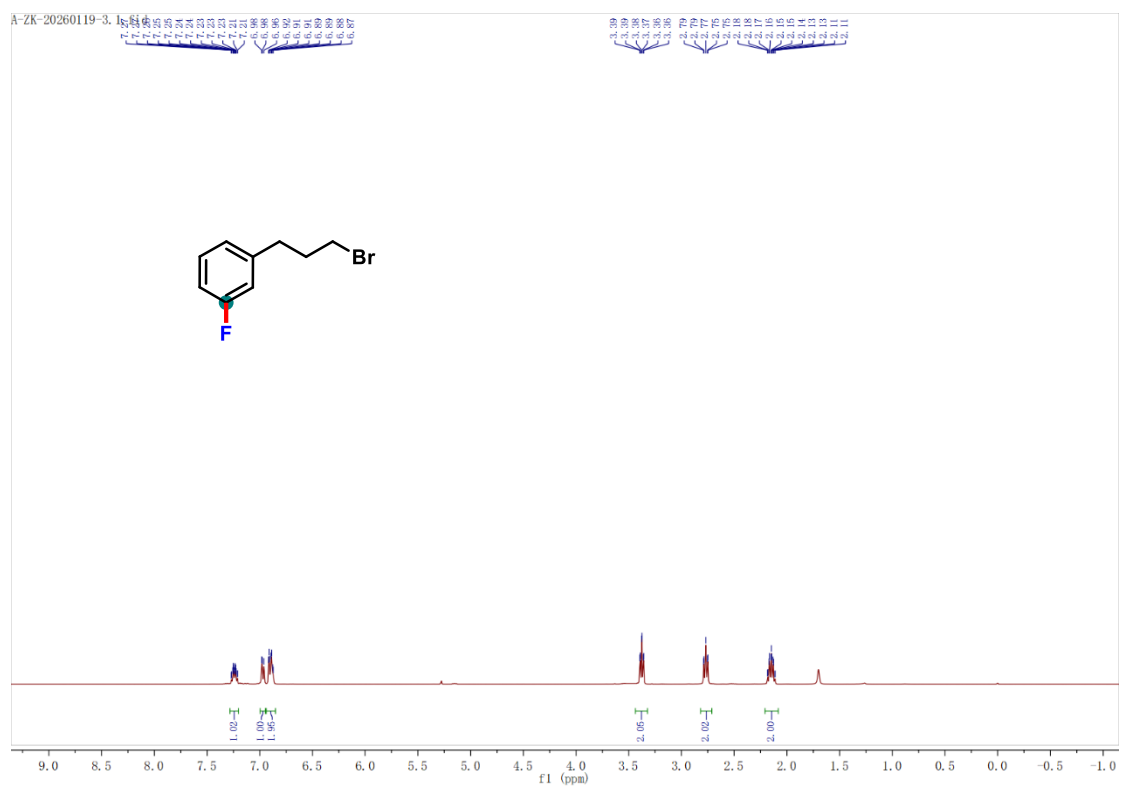

$^1\text{H}$  NMR spectrum of 5g (400 MHz,  $\text{CDCl}_3$ )

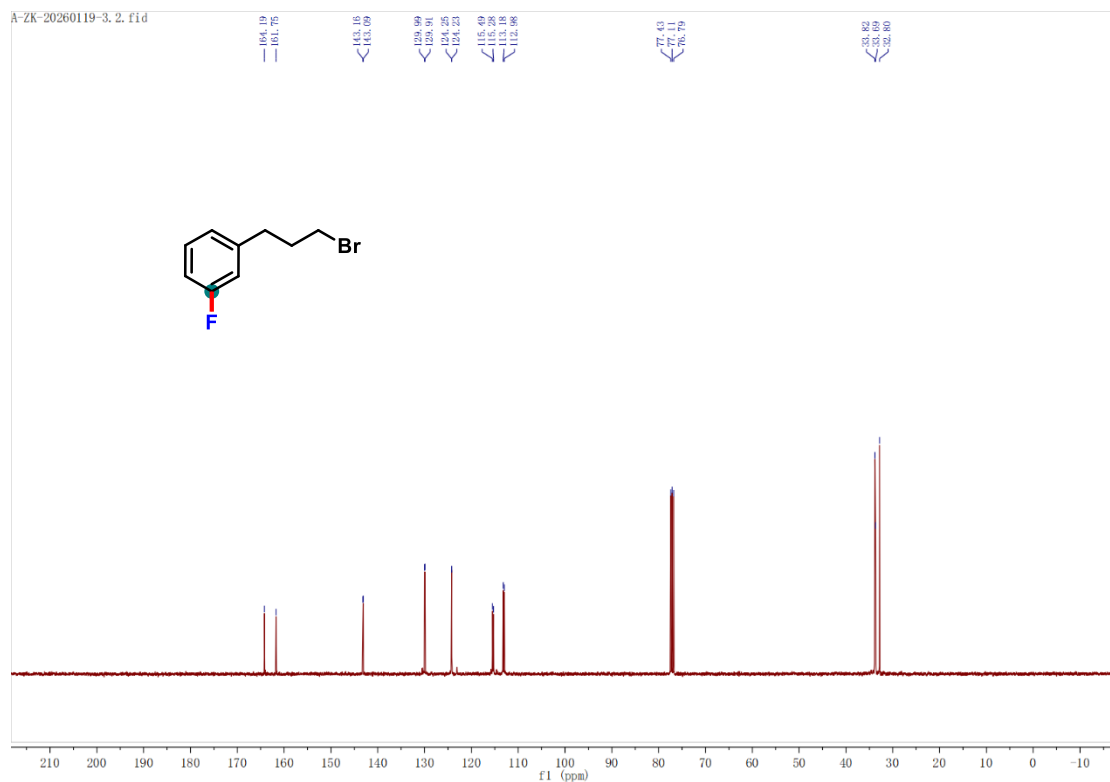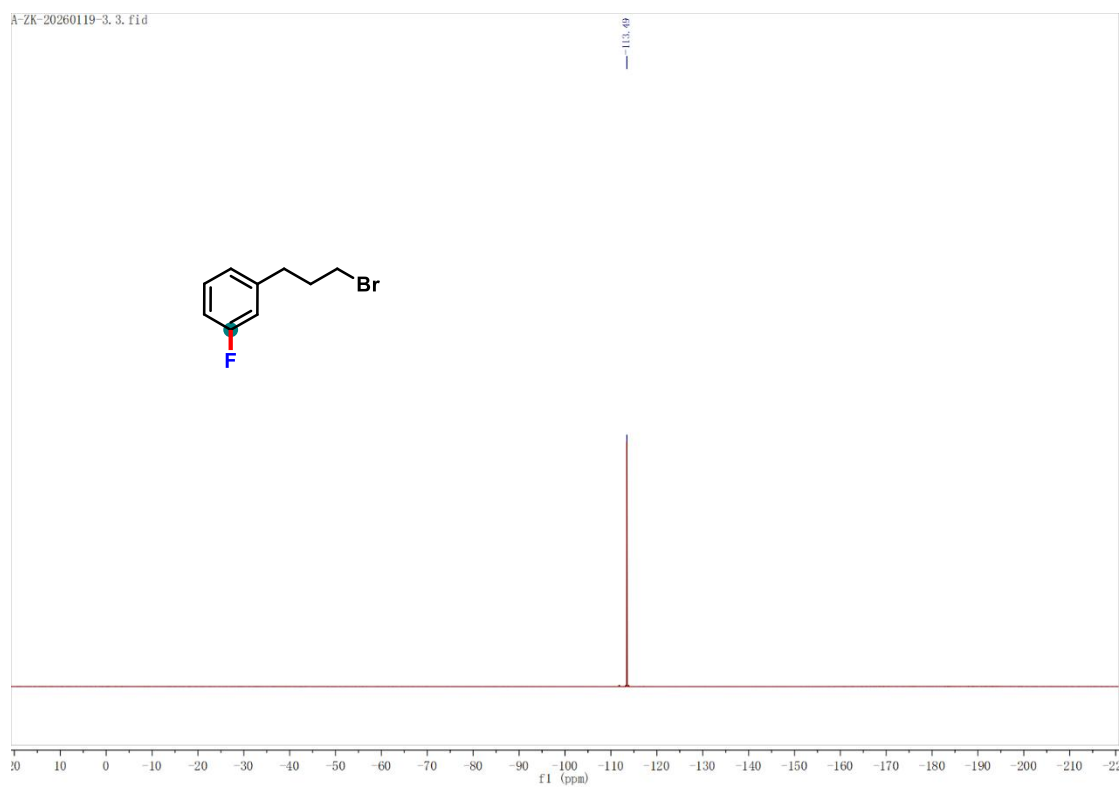

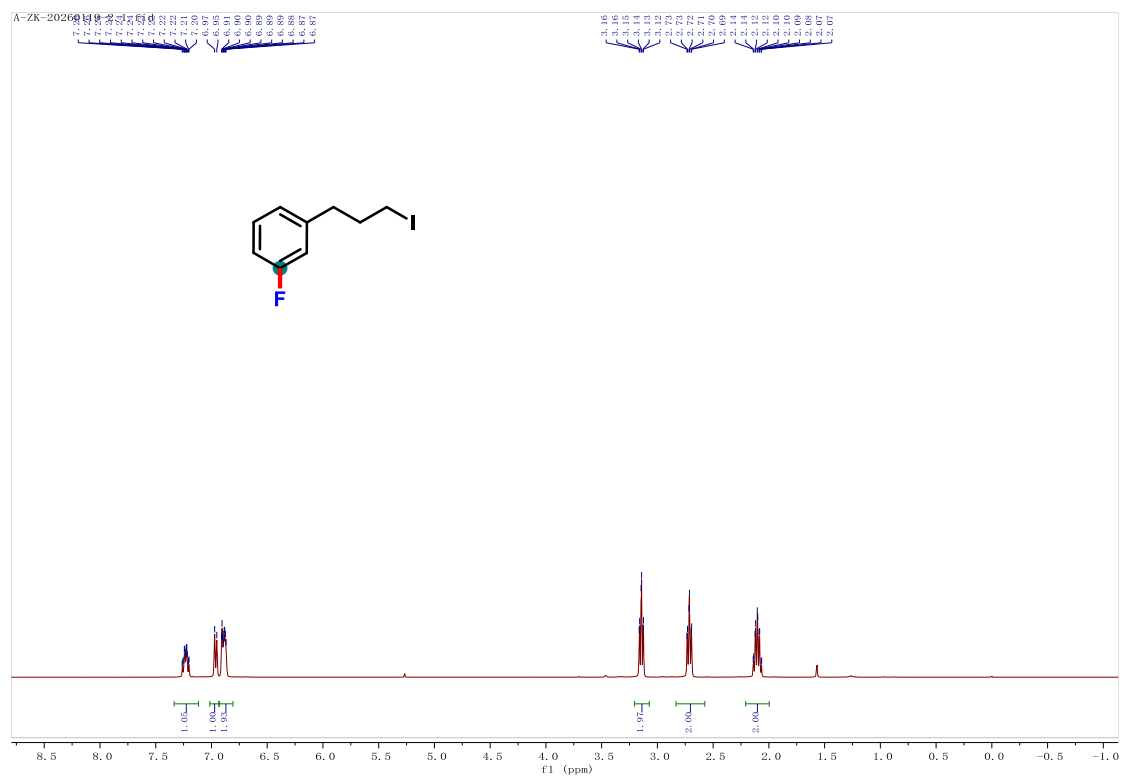

<sup>1</sup>H NMR spectrum of 5h (400 MHz, CDCl<sub>3</sub>)

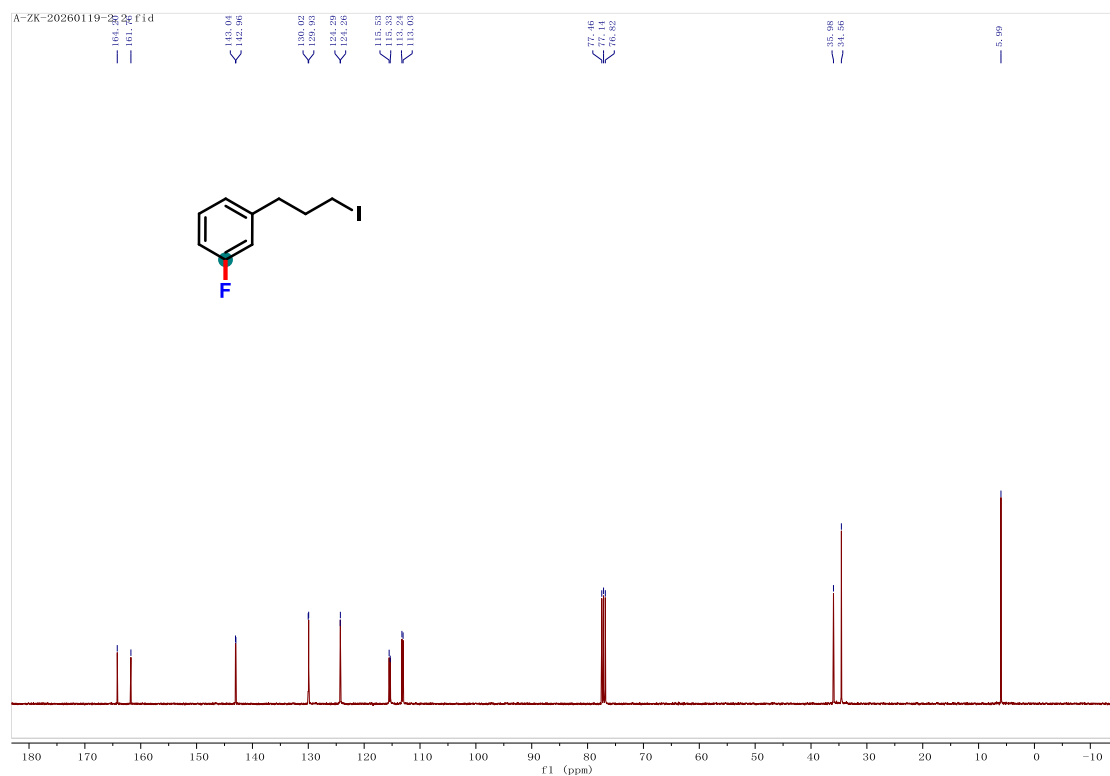

<sup>13</sup>C NMR spectrum of 5h (101 MHz, CDCl<sub>3</sub>)

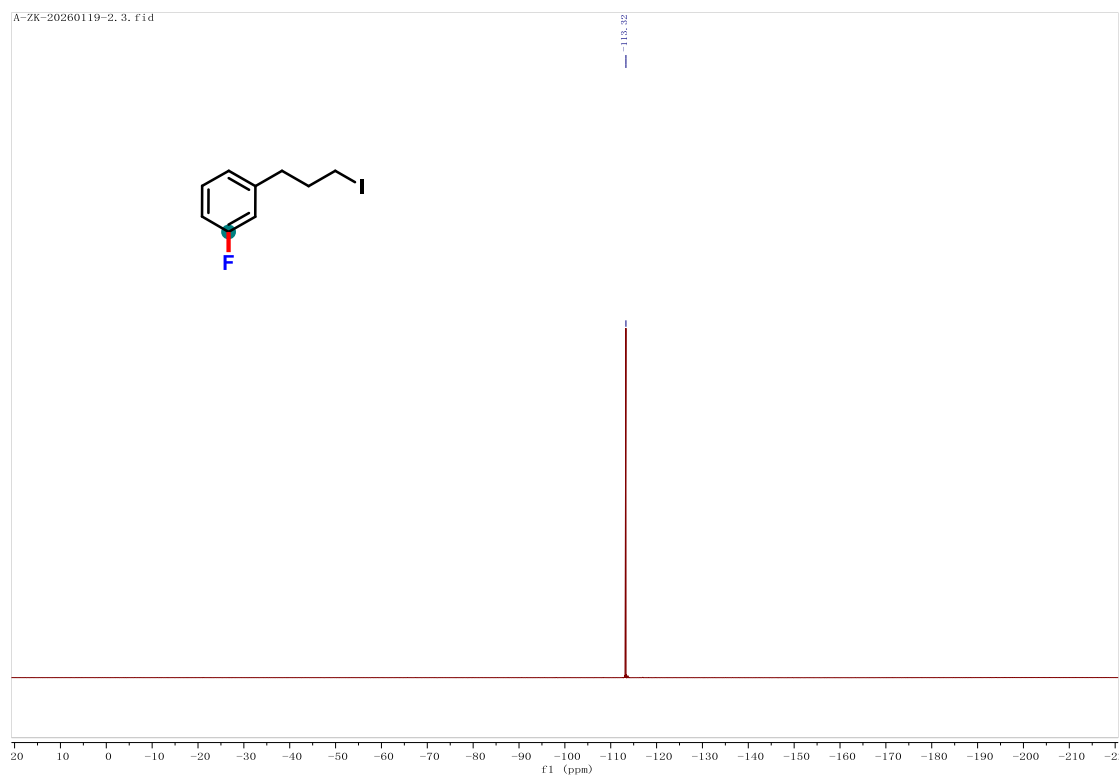

**<sup>19</sup>F NMR spectrum of 5h (376 MHz, CDCl<sub>3</sub>)**

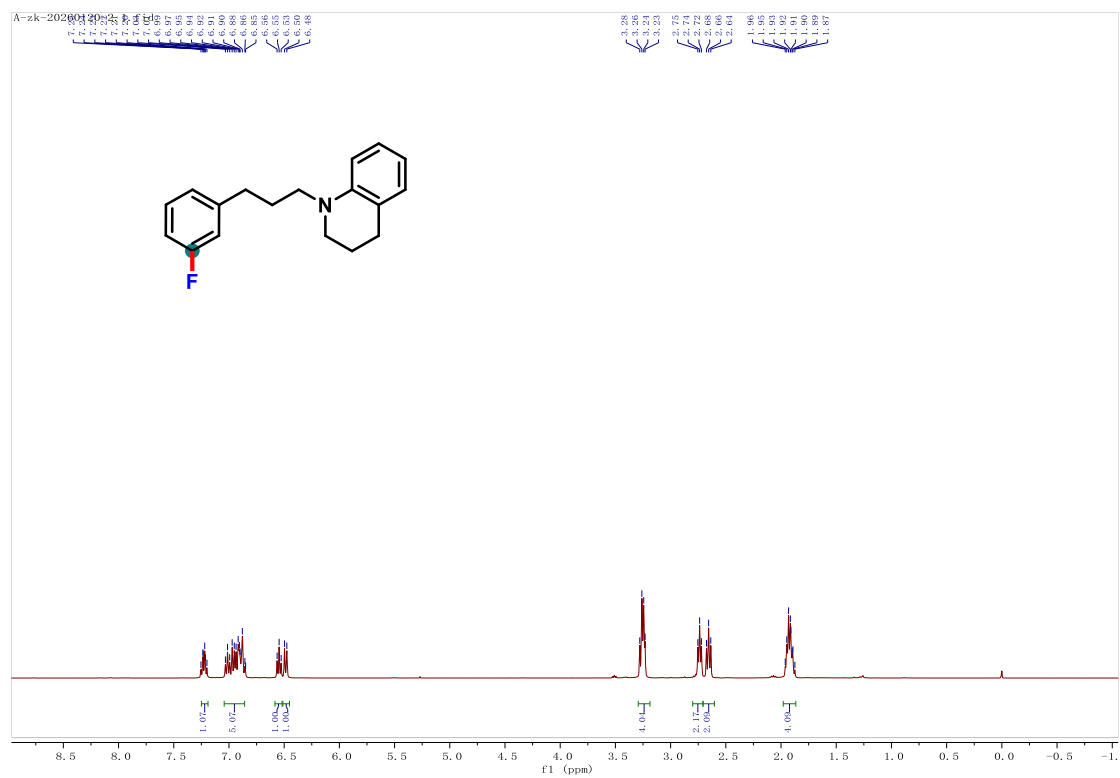

**<sup>1</sup>H NMR spectrum of 5i (400 MHz, CDCl<sub>3</sub>)**

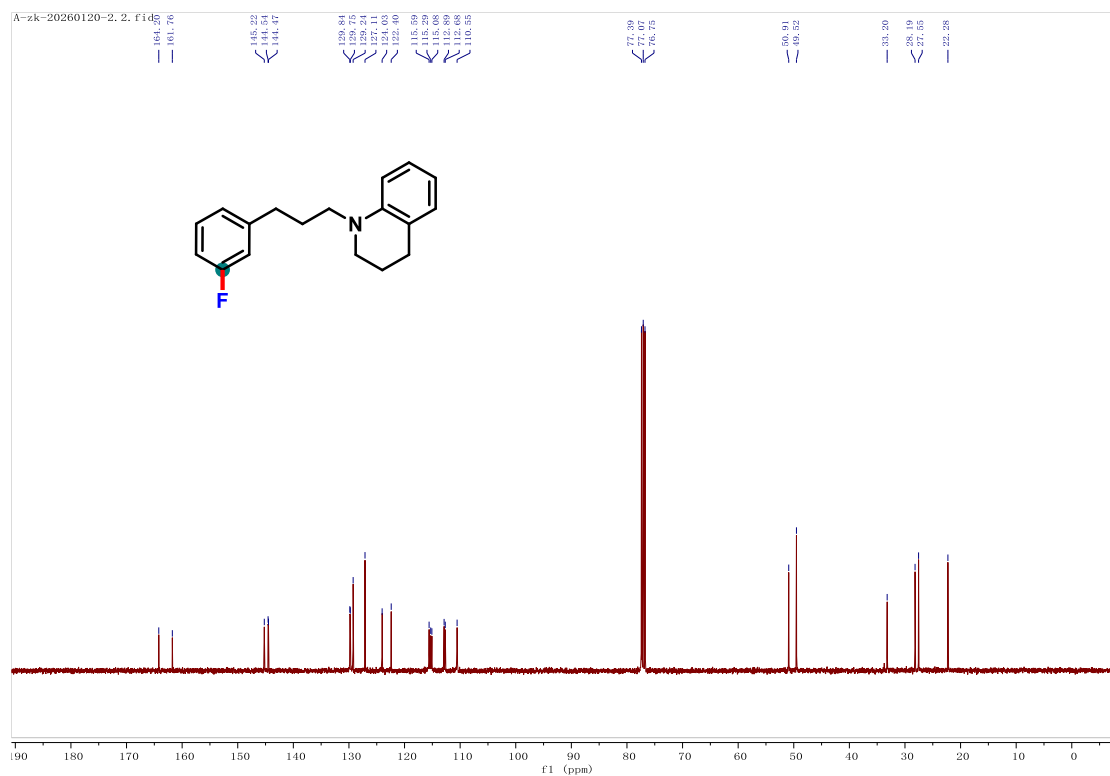

**<sup>13</sup>C NMR spectrum of 5i (101 MHz, CDCl<sub>3</sub>)**

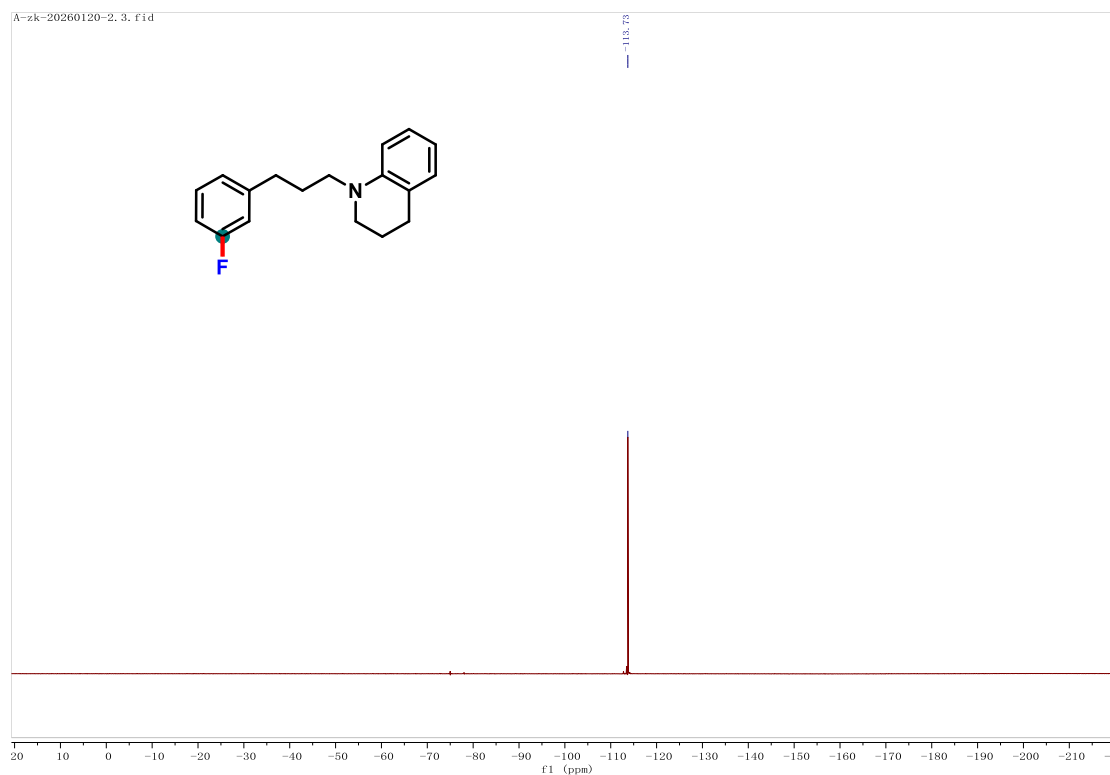

**<sup>19</sup>F NMR spectrum of 5i (376 MHz, CDCl<sub>3</sub>)**



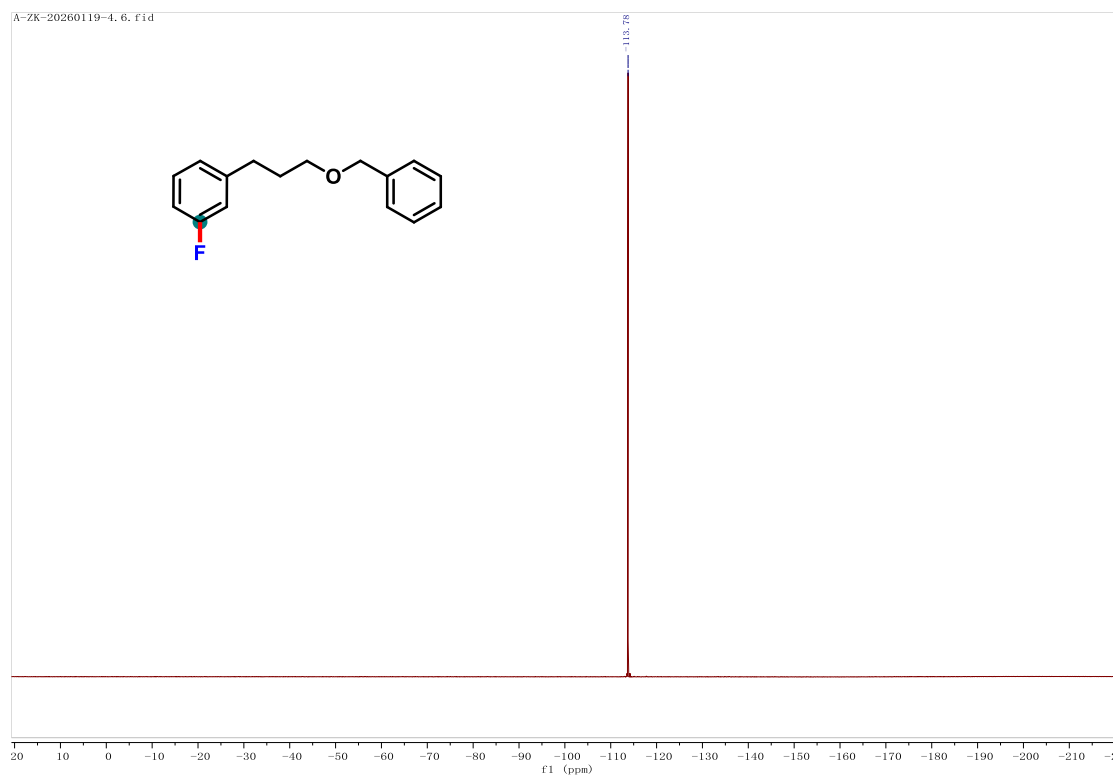

**$^{19}\text{F}$  NMR spectrum of 5j (376 MHz,  $\text{CDCl}_3$ )**

## 12. References

1. S. Bag, R. Jayarajan, U. Dutta, R. Chowdhury, R. Mondal and D. Maiti, *Angew. Chem., Int. Ed.*, 2017, **56**, 12538-12542.
2. M. A. Pena, J. Pérez Sestelo and L. A. Sarandeses, *J. Org. Chem.*, 2007, **72**, 1271-1275.
3. X.-F. Cheng, Y. Li, Y.-M. Su, F. Yin, J.-Y. Wang, J. Sheng, H. U. Vora, X.-S. Wang and J.-Q. Yu, *J. Am. Chem. Soc.*, 2013, **135**, 1236-1239.
4. Y. Liu, G.-H. Xue, Z. He, J.-P. Yue, M. Pan, L. Song, W. Zhang, J.-H. Ye and D.-G. Yu, *J. Am. Chem. Soc.*, 2024, **146**, 28350-28359.
5. X.-X. Wang, L. Li, T.-J. Gong, B. Xiao, X. Lu and Y. Fu, *Org. Lett.*, 2019, **21**, 4298-4302.
6. S. Geng, C. Jiang, Z. Li, H. Wang, Y. Gao, Z. Wang, Q. Liu, N. Jiao and S. Song, *CCS Chem.*, 2025, **0**, 1-12.
7. T. Kurita, K. Hattori, S. Seki, T. Mizumoto, F. Aoki, Y. Yamada, K. Ikawa, T. Maegawa, Y. Monguchi and H. Sajiki, *Chem. – Eur. J.*, 2008, **14**, 664-673.
8. A. Uttry, S. Mal and M. van Gemmeren, *J. Am. Chem. Soc.*, 2021, **143**, 10895-10901.
9. J. Han, H. Yu and W. Zi, *Org. Lett.*, 2022, **24**, 6154-6158.
